# Supplementary material for: Developing a core outcome set for interventions to improve discharge from mental health inpatient services: a survey, Delphi and consensus meeting with key stakeholder groups
Source: PubMed Central journal article supplement (PMC7228512; doi:10.1136/bmjopen-2019-034215), 2020-05-12
Supplement: bmjopen-2019-034215.draft_revisions.pdf [file bmjopen-2019-034215.draft_revisions.pdf]

# BMJ Open

BMJ Open is committed to open peer review. As part of this commitment we make the peer review history of every article we publish publicly available.

When an article is published we post the peer reviewers' comments and the authors' responses online. We also post the versions of the paper that were used during peer review. These are the versions that the peer review comments apply to.

The versions of the paper that follow are the versions that were submitted during the peer review process. They are not the versions of record or the final published versions. They should not be cited or distributed as the published version of this manuscript.

BMJ Open is an open access journal and the full, final, typeset and author-corrected version of record of the manuscript is available on our site with no access controls, subscription charges or pay-per-view fees (<http://bmjopen.bmj.com>).

If you have any questions on BMJ Open's open peer review process please email [info.bmjopen@bmj.com](mailto:info.bmjopen@bmj.com)

# BMJ Open

## **Interventions to Improve Discharge from Acute Adult Mental Health Inpatient Care to the Community: Development of a Core Outcome Set.**

|                               |                                                                                                                                                                                                                                                         |
|-------------------------------|---------------------------------------------------------------------------------------------------------------------------------------------------------------------------------------------------------------------------------------------------------|
| Journal:                      | <i>BMJ Open</i>                                                                                                                                                                                                                                         |
| Manuscript ID                 | bmjopen-2019-034215                                                                                                                                                                                                                                     |
| Article Type:                 | Original research                                                                                                                                                                                                                                       |
| Date Submitted by the Author: | 15-Sep-2019                                                                                                                                                                                                                                             |
| Complete List of Authors:     | Tyler, Natasha; The University of Manchester, NIHR Greater Manchester Patient Safety Translational Research Centre<br>Wright, Nicola; University of Nottingham<br>Waring, Justin ; University of Birmingham<br>Grundy, Andrew; University of Nottingham |
| Keywords:                     | MENTAL HEALTH, Core Outcome Set, Discharge, Care Transitions, Acute Adult Mental Health Services                                                                                                                                                        |
|                               |                                                                                                                                                                                                                                                         |

SCHOLARONE™  
Manuscripts

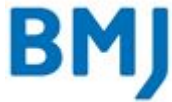

I, the Submitting Author has the right to grant and does grant on behalf of all authors of the Work (as defined in the below author licence), an exclusive licence and/or a non-exclusive licence for contributions from authors who are: i) UK Crown employees; ii) where BMJ has agreed a CC-BY licence shall apply, and/or iii) in accordance with the terms applicable for US Federal Government officers or employees acting as part of their official duties; on a worldwide, perpetual, irrevocable, royalty-free basis to BMJ Publishing Group Ltd ("BMJ") its licensees and where the relevant Journal is co-owned by BMJ to the co-owners of the Journal, to publish the Work in this journal and any other BMJ products and to exploit all rights, as set out in our [licence](#).

The Submitting Author accepts and understands that any supply made under these terms is made by BMJ to the Submitting Author unless you are acting as an employee on behalf of your employer or a postgraduate student of an affiliated institution which is paying any applicable article publishing charge ("APC") for Open Access articles. Where the Submitting Author wishes to make the Work available on an Open Access basis (and intends to pay the relevant APC), the terms of reuse of such Open Access shall be governed by a Creative Commons licence – details of these licences and which [Creative Commons](#) licence will apply to this Work are set out in our licence referred to above.

Other than as permitted in any relevant BMJ Author's Self Archiving Policies, I confirm this Work has not been accepted for publication elsewhere, is not being considered for publication elsewhere and does not duplicate material already published. I confirm all authors consent to publication of this Work and authorise the granting of this licence.

1  
2  
3 Title: Interventions to Improve Discharge from Acute Adult Mental Health Inpatient Care  
4 to the Community: Development of a Core Outcome Set.  
5  
6  
7

8 Authors:  
9

10 Corresponding Author: Natasha Tyler (Greater Manchester Patient Safety Translational  
11 Research Centre, University of Manchester, Manchester, UK,  
12 [Natasha.tyler@manchester.ac.uk](mailto:Natasha.tyler@manchester.ac.uk), 0161 275 7620)  
13

14 Nicola Wright (University of Nottingham, Nottingham, UK)  
15

16 Justin Waring (Health Services Management Centre, University of Birmingham,  
17 Birmingham, UK)  
18

19 Andrew Grundy (University of Nottingham, Nottingham, UK)  
20  
21  
22  
23  
24  
25  
26  
27  
28  
29  
30  
31  
32  
33  
34  
35  
36  
37  
38  
39  
40  
41  
42  
43  
44  
45  
46  
47  
48  
49  
50  
51  
52  
53  
54  
55  
56  
57  
58  
59  
60

## Abstract

### Objective

To develop a core set of outcomes to be used in all future studies into discharge from acute mental health services to increase homogeneity of outcome reporting.

### Design

We used a cross-sectional online survey with qualitative responses to derive a comprehensive list of outcomes, followed by two online Delphi rounds and a face-to-face consensus meeting.

### Setting

The setting the core outcome set applies to is acute adult mental health.

### Participants

Ninety-three participants in total completed the questionnaire, 69 in Delphi round one, 68 in round two, with relatively even representation of groups. Eleven participants attended the consensus meeting. Participants were from five stakeholder groups: service-users, families and carers, researchers, healthcare professionals and policy makers.

### Interventions

The core outcome set is intended for all interventions that aim to improve discharge from acute mental health services to the community.

### Results

Service-users, healthcare professionals, researchers, carers/families and end-users of research agreed on a four-item core outcome set: Readmission, Suicide completed, Service-user reported psychological distress and Quality of life.

### Conclusion

Implementation of the core outcome set in future trials research will provide a framework to achieve standardisation, facilitate selection of outcome measures, allow between-study comparisons, and ultimately enhance the relevance of trial or research findings to healthcare professionals, researchers, policy makers and service users.

## Article Summary

### Strengths and Limitations

- This the first initiative to reduce heterogeneity in outcome reporting for interventions that focus on discharge from acute mental health services.
- We achieved a high level of consensus amongst 69 service users, families/carers, healthcare professionals, researchers and policy makers.
- Although the stakeholder group included international researchers, service users and healthcare professionals were from the UK

## Funding

This work was funded by the National Institute for Health Research (NIHR) Greater Manchester Patient Safety Translational Research Centre (NIHR Greater Manchester PSTRC). The views expressed are those of the author(s) and not necessarily those of the NHS, the NIHR or the Department of Health and Social Care.

## Competing Interests

The authors report no competing interests.

## Key Words

- Acute Adult Mental Health Services
- Core Outcome Set
- Mental Health
- Discharge
- Care Transitions

## Background

Care transitions (when patient care is transferred from one team, department or organisation to another) are widely recognised as a vulnerable and high-risk stage in the care pathway [1–3]. Safety issues may be intensified in acute mental health services, where care transitions are described as chaotic [3]. For example, suicide risk increases post-discharge from acute mental health services [4,5]. A growing body of research describes these risks either directly in terms of identified ‘safety’ events or indirectly in terms of broader ‘problems’, including for example treatment non-adherence, inappropriate readmissions, increased risk of self-injury or suicide attempts [3,6–8].

Internationally, researchers have attempted to find solutions to the problems or threats to safety associated with discharge from acute mental health services by developing interventions that aim to improve different aspects of discharge planning, transitions, continuity of care, and follow-up care. There are various types of discharge intervention presented in the literature [9]. Some interventions aim to improve discharge by introducing new roles, for example a discharge co-ordinator, that co-ordinates care and provides and single point of contact to help navigate the complex system [10]. Others focus on increasing contact between clinical staff and service users, for example using letters, videoconferencing or telephone follow-up [11–13]. Many ‘successful’ interventions in reducing readmission, bridged the boundaries between ward and community by providing types of ward-based care in the community [14,15] or where community teams lead discharge planning on the wards [16], with a focus on the early development of therapeutic relationships. Other successful interventions aim to solve a particular problem for a smaller group of acute service users, for example those at risk of homelessness, by providing financial and social support [17,18].

There has been little attempt to compare these diverse interventions. Existing reviews have included either a narrow range of studies addressing a single outcome or focus on a specific

1  
2  
3 time frame in an attempt to synthesise results [8,19]. Comparison and meta-synthesis of  
4 effectiveness of interventions has reported limited success. Across the papers included in our  
5 systematic review and those by other researchers [1,20], variation in the outcomes reported is  
6 substantial. This limits between study comparability and delays advancement in evidence  
7 collection. Furthermore, outcomes in these trials were not necessarily representative of the  
8 measures that service users would consider important at discharge. Both matters can  
9 potentially be addressed with the development of a 'core outcome set', defined as "an agreed,  
10 standardised collection of outcomes which should be measured and reported, as a minimum,  
11 in all trials for a specific clinical area" [21].  
12  
13

14  
15 The development and use of 'core outcome sets' has been endorsed as a means to reduce  
16 outcome heterogeneity in research, and to increase the relevance of research through the  
17 involvement of key stakeholders in its development [22]. There is an emerging body of  
18 literature highlighting the difficulties of defining and assessing outcomes in a mental health  
19 population [23]. There is also evidence of a lack of agreement amongst key groups about  
20 what should be measured and in what capacity and an evident tension between the population  
21 health perspective and provision of individualised care [19,23]. One aforementioned  
22 previous review identified the need for consensus on outcome definitions in discharge  
23 planning interventions [19], similarly a recent Kings Fund report suggested broader  
24 consensus upon the outcomes that matter is imperative for advancement [23]. Therefore,  
25 generating agreement amongst healthcare professionals, service users, policy makers and  
26 researchers is a difficult but imperative task, to enable the useful direction of healthcare  
27 services [23]. The difficulties are further exemplified when applied to care transitions, a  
28 multi-agency, multi-stage, complex period of the care pathway [3,24]. This paper outlines  
29 the development of a core outcome set for research of interventions to improve discharge  
30 from acute mental health wards to the community.  
31  
32  
33  
34

## 35 **Methods**

### 36 **Study overview**

37  
38 The scope of the core outcome set was defined according to the criteria recommended by  
39 Core Outcome Measures in Effectiveness Trials (COMET) [25]. The health condition was  
40 functional conditions (mental disorders other than dementia, and includes severe mental  
41 illness such as schizophrenia). The population was adults aged 18-65, the intervention was  
42 any interventions that aimed to improve discharge from an acute mental health setting to the  
43 community. The core outcome set was developed using four stages, including service users  
44 and healthcare professionals at each stage: (1) a long list of outcomes was generated through  
45 systematic review [1] and qualitative survey; (2) the resulting long outcome list was used to  
46 populate an online Delphi process; and (3) the results of the Delphi survey were appraised at  
47 a consensus meeting and the final core outcome set was established. After the development of  
48 the core outcome set a final stage (4), engaged stakeholders to make recommendations for the  
49 measurement of the core outcomes. The process included a series of core research team  
50 meetings at every stage, the team comprised of a researcher and core outcome set developer,  
51 an associate professor in mental health and mental health nurse, a researcher and expert by  
52 lived experience of acute services and an expert in patient safety.  
53  
54  
55  
56

### 57 **Participants**

1  
2  
3 For the online questionnaires, groups of participants were recruited in various ways in  
4 December 2018 to January 2019. Academic researchers were recruited if their research had  
5 been included in our systematic review or if they were known researchers in the field  
6 identified by the team. End-users of research (policy makers, NGOs, NHS management,  
7 commissioners, advocates etc.) were recruited via searching for publicly available contact  
8 details or using our team's professional networks or social media. Service users and  
9 healthcare professionals were recruited through social media. Twitter was nominated as the  
10 primary platform for distribution due to its ability to reach into the specific communities of  
11 interest we required: mental health professionals, service users and families/carers. Using  
12 social media has been reported as a cost-effective and efficient way to recruit those from  
13 potentially stigmatised groups [26]. Further, the peer network structures of social media  
14 platforms enable users to recruit other users through sharing links within their networks. In  
15 order to reduce attrition in round 3 those who dropped out after the first questionnaire were  
16 invited to re-join the panel.

17  
18  
19  
20 Participants did not fit into distinct homogeneous groups, for example mental health  
21 professionals were sometimes also past service users or family members of service users.  
22 Similarly researchers had personal experience of inpatient mental health services. Therefore,  
23 wherever possible we considered the group as whole and tried not to compare categories.

24  
25  
26 For the consensus meeting, UK participants were asked in the final round to indicate whether  
27 they would be interested in a face-to-face meeting. We invited a random sample of interested  
28 participants to attend, that ensured representative of the stakeholder groups. If a participant  
29 declined the invite a similarly matched participant was invited.

### 30 31 32 **Stage 1: Gathering information**

33  
34 In addition to the outcomes extracted from the systematic review [1], outcomes of importance  
35 to service users, health care professionals, families, researchers and end-users of research  
36 were identified through qualitative surveys. Additional file 1, outlines the questions asked to  
37 each group, if an individual was associated with numerous stakeholder groups they would be  
38 presented with question sets relevant to each group. Informed consent was obtained before  
39 questionnaires were answered. Outcomes were identified both indirectly, by extrapolating  
40 from service users' experiences (e.g. What would make discharge from an acute mental  
41 health ward safe in your opinion?), and directly, by asking specifically about outcomes (e.g.  
42 Can you think of any important outcomes to measure in research assessing discharge  
43 interventions?). We used open questions that were developed to elicit potential additional  
44 outcomes. The questions were loosely modelled on questions developed for a large scale  
45 outcome generation study for a depression core outcome set which were developed with  
46 service users and healthcare professionals [27]. The question format was mirrored for a  
47 mental health discharge theme and the views of a PPI (patient and public involvement, n=5)  
48 group sought to confirm appropriateness of questions and instructions.

49  
50  
51  
52 Qualitative data was coded to identify outcomes and thematically synthesised [28]. This  
53 involved line-by-coding of text and development of descriptive themes, the final stage  
54 involved generating analytical themes, which were converted into potential outcomes where  
55 applicable. Outcomes from the systematic review [1] and qualitative surveys were combined  
56 to generate a long list of outcomes. This list, along with relevant quotes from the qualitative  
57 data, was discussed by the core research team in a structured meeting. For each outcome, the  
58 group decided whether it should be a stand-alone outcome, combined with other codes of a  
59  
60



1  
2  
3 similar thematic nature or removed from the process due to being of limited importance for a  
4 core outcome set. For example, we agreed to merge closely related items (e.g. *family*  
5 *relations* and *quality of interpersonal relationships*) and to exclude outcomes considered to  
6 be of limited importance (e.g., too specific to a particular group: *Autistic life*; or intervention  
7 *Antipsychotic Politherapy*). Unless there was a unanimous decision to merge or remove an  
8 outcome, it remained as a stand-alone outcome. The group decisions about each outcome are  
9 documented in additional file 2. The final outcome list was used to populate the Delphi  
10 questionnaire. The outcomes list and instructions for the questionnaires were reviewed for  
11 face validity, understanding, and acceptability by a PPI group and modified according to  
12 feedback. The round was open for 6 weeks beginning December 10<sup>th</sup> 2018.  
13  
14

## 15 16 **Stage 2: Delphi survey**

17 We ran the Delphi survey manually using Qualtrics: a secure online hosting platform [29].  
18 Only participants that responded to the questionnaire in stage 1, were invited to take part in  
19 first round of the Delphi (stage 2). The Delphi process was conducted across two rounds. In  
20 each round, participants were asked whether the items should become part of a core outcome  
21 set on a 1–7 scale described as: Strongly Agree (1), Agree (2), Slightly Agree (3), Neither  
22 Agree nor disagree (4), Slightly Disagree (5), Disagree (6), Strongly Disagree (7). There was  
23 a free-text comments box and participants were encouraged to provide comments that would  
24 be fed-back anonymously to the group. Participants could suggest additional outcomes at the  
25 end of round one, which were reviewed by the core research team. Any outcome not already  
26 represented was added to round two. A link to the survey was sent via email. Each round  
27 remained open for 14 days and participants received two follow-up reminder emails. Round  
28 one was open from late February 2019 to early March 2019, round two was late March to  
29 early April.  
30  
31

32  
33 In round two median group scores for each outcome and anonymous comments for and  
34 against from the previous round were presented and participants were asked to reflect on the  
35 information presented and score each outcome again. The percentage of participant  
36 agreement with each outcome on a scale of 1–7 was calculated from the scores obtained  
37 during round one and again in round two.  
38  
39

40 Literature suggests that consensus levels should be set a priori at a minimum of 70 percent  
41 [25,30]. We unanimously chose a 75% consensus level, slightly higher than the minimum to  
42 increase sensitivity, but to still allow for a varied pool of applicable outcomes given the  
43 tension in the literature around disagreement between service-user, health professional and  
44 policy-makers opinions of mental health outcomes [23]. Consensus criteria were defined a  
45 priori: outcomes scored as Agree or Strongly Agree (1-2) by 75% or more of the group  
46 reached consensus for inclusion and were included in the provisional core outcome set.  
47 Outcomes scored as Disagree or Strongly Disagree (6–7) by 75% or more were defined as  
48 having reached consensus for exclusion and were excluded. Outcomes not fulfilling criteria  
49 for consensus inclusion or exclusion were defined as not having reached consensus and were  
50 re-presented in round two.  
51  
52  
53

54 As no outcomes met the original criteria for having reached consensus for exclusion after  
55 round one, it was agreed by the research team to redefine the criteria for having reached  
56 consensus for exclusion if 50% or less of participants scored the item as Strongly Agree or  
57 Agree (6-7). Reducing exclusion criteria after round one has been used effectively in past  
58 core outcome set research [30].  
59  
60

### Stage 3: Consensus meeting

The results of the Delphi survey were presented at a consensus meeting, the main goal of the consensus meeting was to decide which items will be included in the final core outcome set. The format of the consensus meeting comprised of a short overview of the study, a summary of the results of how each stakeholder group had scored each outcome, beginning with the outcomes that met consensus [31]. This was chaired by an independent researcher, with expertise in consensus methodology, and who was not a member of the core research team. Participants were sampled to achieve a balanced representation of service users, health-care professionals, researchers and end-users of research. We aimed to have a small representative group of between 9 and 12 to enable meaningful small group discussions, similar to consensus meetings chaired by the facilitator in other fields [32,33]. International participation was restricted because of budgetary constraints. Outcomes identified in round one and two of the Delphi as having reached consensus for inclusion were presented and participants were asked if there were any fundamental reasons why these should not be included in the core outcome set. Divergent views were actively sought and the chair ensured everyone had opportunity to participate in discussions before voting commenced. Outcomes from the preliminary core outcome set were discussed in terms of feasibility and voted upon. Voting was conducted anonymously using cards in an envelope with bivariate response options (include/exclude). Voting and consensus criteria followed the same format as in the Delphi (75% for inclusion). Results were presented after the voting of all outcomes had finished. Outcomes deemed to be having reached consensus for exclusion or with no consensus in the Delphi were reviewed and participants were asked if there were any fundamental reasons why these should be included in the core outcome set, with individual outcomes being discussed and voted on, only if proposed as being important by a meeting participant. Outcomes meeting criteria for consensus were included in the core outcome set; all other items excluded. The meeting finished with the presentation and ratification (a final review and discussion) of the four-item core outcome set.

### Stage 4: Preliminary Measurement Recommendations

After the core outcome set was agreed in the consensus meeting, we invited all participants from the three rounds to recommend measures and time markers in a final online questionnaire. Participants were invited to participate if they had been involved in any of the previous online rounds. The invitation made it clear that the questionnaire is most relevant to researchers, but that other groups with an opinion or interest are welcome to contribute. This was due to the specific knowledge of instruments required to complete this round.

In this questionnaire participants were presented with the four core outcomes. For each core outcome they were presented with any measures used to assess that outcome in our systematic review studies [1] and any additional measures that had been recommended to the team during the process. Participants were asked to choose the one most appropriate, (don't know, other, new instrument, no instrument were also options). A second question also asked which time markers would be recommended, with options to select all applicable. These options were also developed based on time markers used in the systematic review [1].

### Ethics and registration

1  
2  
3 Our findings are reported in line with the Core Outcome Set-Standards for Reporting (COS-  
4 STAR) guidance [31]. The study was prospectively registered with the COMET initiative.  
5 The study was approved by the University of Nottingham Business School ethics committee.  
6  
7

### 8 **Role of the funding source**

9

10 The funding source was not involved in study design; in the collection, analysis, and  
11 interpretation of data; in the writing of the report; and in the decision to submit the paper for  
12 publication  
13

## 14 **Results**

15

### 16 **Stage 1: Information gathering**

17

18  
19 Our systematic review has been described in detail elsewhere [1]. In summary 69 outcome  
20 categories were identified from 45 studies. Ninety-three participants from 12 countries  
21 completed the information gathering questionnaire, including 27 identified as service users,  
22 17 family/carers, 39 health-care professionals, 15 end-user of research and 37 researchers. As  
23 noted above, many chose multiple categories. Additional file 3 presents participants  
24 demographics. Qualitative questionnaires revealed an additional 45 outcomes that were not  
25 identified in the literature (for example, outcomes concerning involvement in discharge  
26 planning, see additional file 2). After discussion within the research team, 82 standardised  
27 outcome terms were taken forward into the Delphi process; 19 outcomes were  
28 combined/collapsed and 13 were removed, see additional file 2.  
29  
30  
31

### 32 **Stage 2: Delphi process**

33

34 Sixty-nine participants completed round one of the Delphi (22 service users, families and  
35 carers, 26 researchers and 21 healthcare professionals and decision makers) and 68  
36 participants completed round two (30 researchers, 18 service users and families and 20  
37 healthcare professionals and decision makers). Whilst 5 participants dropped out after round  
38 one, 4 new participants joined the panel in round two. Attrition rate from first questionnaire  
39 to round one of the Delphi was 25.8%, there was 1.4% attrition between round one and two  
40 of the Delphi. Seven additional outcomes were proposed during round one, of which two  
41 were added into round two after a core team discussion. The full list of Delphi items is  
42 available in additional file 4.  
43  
44

45  
46 After round one, 14 outcomes met the criteria for consensus inclusion, these were: Service  
47 user involvement in discharge planning; Functioning; Mental health and illness; Personal  
48 Recovery; Service user understanding of discharge plan; Quality of life; Suicide Completed;  
49 Readmission; Service user involvement in decision making; Service user satisfaction with  
50 information provision at discharge; Service user knowledge of how to access community  
51 support; Recurrence; Suicide Attempted; Discharge to appropriate accommodation (see table  
52 1). Twenty outcomes met the revised criteria for having reached consensus for exclusion.  
53 Forty-eight outcomes did not meet consensus criteria and were re-presented to the group in  
54 round two. Therefore, 50 outcomes were presented in round two, only one outcome met the  
55 criteria for consensus after this round: meaningful activity. No outcomes met criteria for  
56 exclusion and 49 did not meet consensus. Additional file 4 shows consensus levels for each  
57 outcome in each round.  
58  
59  
60

Table 1: The Preliminary Core Outcome Set at the end of the online Delphi.

|                                                                                                                      | Percentage agreement | Percentage Disagreement | Median | Researchers | Service users and families | HCPs and DMs |
|----------------------------------------------------------------------------------------------------------------------|----------------------|-------------------------|--------|-------------|----------------------------|--------------|
| Service user involvement in discharge planning (inc. feeling listened to)                                            | 87%                  | 4%                      | 7      | 65%         | 100%                       | 95%          |
| Functioning (health, social, etc.)                                                                                   | 83%                  | 3%                      | 6      | 69%         | 100%                       | 81%          |
| Mental health and illness (symptom/psychological distress)                                                           | 83%                  | 3%                      | 6      | 73%         | 91%                        | 86%          |
| Personal Recovery                                                                                                    | 82%                  | 1%                      | 6      | 75%         | 86%                        | 86%          |
| Service user understanding of discharge plan                                                                         | 81%                  | 3%                      | 6      | 65%         | 91%                        | 86%          |
| Quality of life                                                                                                      | 81%                  | 1%                      | 6.5    | 65%         | 90%                        | 86%          |
| Suicide Completed                                                                                                    | 80%                  | 4%                      | 7      | 80%         | 90%                        | 68%          |
| Readmission                                                                                                          | 80%                  | 6%                      | 6      | 77%         | 77%                        | 86%          |
| Service user involvement in decision making (shared decision making)                                                 | 77%                  | 4%                      | 7      | 50%         | 95%                        | 86%          |
| Service user satisfaction with information provision at discharge (e.g. regarding medication, risk, crisis planning) | 77%                  | 6%                      | 6      | 65%         | 86%                        | 81%          |
| Service user knowledge of how to access community support (i.e. in an emergency)                                     | 77%                  | 3%                      | 6      | 58%         | 91%                        | 86%          |
| Recurrence (i.e. relapse)                                                                                            | 75%                  | 1%                      | 6      | 58%         | 91%                        | 76%          |
| Suicide Attempted                                                                                                    | 75%                  | 4%                      | 6      | 62%         | 86%                        | 81%          |

|                                           |     |    |   |     |     |     |
|-------------------------------------------|-----|----|---|-----|-----|-----|
| Discharge to appropriate accommodation    | 75% | 3% | 6 | 69% | 91% | 67% |
| Meaningful Activity (included in Round 2) |     |    |   | 73% | 80% | 79% |

### Stage 3: Consensus Meeting

Eleven participants attended the consensus meeting, as in previous rounds these categories were not exclusive, six participants were researchers, three identified as service users, three as healthcare professionals and three end-users of research, see table 2. Table 3 shows the quantitative results of the meeting.

The preliminary 15-item core outcome set was considered individually and discussions indicated that many of the outcomes were elements of an ideal discharge, and process outcomes/variables, but probably not measurable outcomes that should be included in a core outcome set. After these discussions and independent and anonymous voting, five items no longer met consensus criteria for inclusion. First, 'service user involvement' in discharge planning, and the associated items 'Service user understanding of discharge plan', 'Service user involvement in decision making', 'Service user satisfaction with information provision at discharge'; and 'Service user knowledge of how to access community support'. There was a tremendous agreement amongst the group that these are very important elements of a successful discharge, but not core outcomes due to issues surrounding validity and meaning. In the discussion we present these five outcomes as a potential additional important self-reported measure of service user satisfaction and involvement.

'Mental Health and illness' was initially close to consensus with 73% consensus to include, however those that chose to exclude found it to be too vague, and articulated that they were most interested in measuring acute psychological distress, rather than mental health and illness. The service user representatives in the group interpreted "recovery" to mean a complete amelioration of symptoms and even when in "recovery" individuals described continuing to experience distress and difficulties with their mental health. We chose to therefore separate the broader mental health and illness outcome into self-reported psychological distress and clinician reported mental health. The granular outcome of self-reported psychological distress resulted in 100% consensus to include. On the contrary clinician reported mental health did not meet consensus criteria (45%). Similar discussions happened around the recurrence (relapse) outcome, whereby its inclusion in a core outcome set, would ultimately necessitate buy-in to criteria model, which suggested that mental health problems could and should be completely resolved.

Discussions around the 'suicide attempted' outcome indicated that participants felt that suicide attempts or self-harm had diverse motivations and definitions and they discussed the issues of delineating the boundaries of self-harm and suicide attempts and how this is documented. After the consensus meeting this outcome no-longer meet consensus criteria to include. Discussions surrounding personal recovery, functioning and meaningful activity indicated that participants considered these outcomes too vague and subjective to be a component of a core outcome set. There was consensus to exclude meaningful activity and recovery, and no consensus to include personal recovery. There was consensus to exclude

discharge to appropriate accommodation, discussion indicated this was primarily because this spanned the health and social care boundaries and may not be applicable to every intervention.

On completion of the meeting, only four outcomes met consensus criteria for inclusion, see figure 1. A core outcome set of four was ratified and participants agreed that the following should be included: readmission, quality of life, suicide completed and service user reported psychological distress. Readmission was the most frequently used outcome in past research, and despite limitations, participants felt it was one of the only proxy measures of appropriate discharge. Quality of life and psychological distress were considered important ways of quantitatively assessing the psycho-social elements of discharge; which are of primary importance. Suicide completed was considered rare but imperative data to capture given the research highlighting the relationship between acute mental health discharge and suicide highlighted by a growing body of literature [5,34]. Figure 2 shows the process undertaken to reach the core outcome set.

<Insert Figure 1>

Table 2: Participants that attended consensus meeting

| PP Number | Researcher | Service User | Healthcare Professional | End-user of Research |
|-----------|------------|--------------|-------------------------|----------------------|
| 1         | X          |              |                         |                      |
| 2         | X          |              |                         |                      |
| 3         | X          |              |                         |                      |
| 4         | X          |              | x                       |                      |
| 5         | x          | X            |                         |                      |
| 6         | x          |              |                         | X                    |
| 7         |            |              | x                       |                      |
| 8         |            |              | x                       | x                    |
| 9         |            | X            |                         |                      |
| 10        |            | X            |                         |                      |
| 11        |            |              |                         | x                    |
| Total     | 6          | 3            | 3                       | 3                    |

Table 3: Outcomes of consensus meeting, levels of consensus in anonymous voting

|                                              | Include | Exclude | Percentage |
|----------------------------------------------|---------|---------|------------|
| Readmission                                  | 10      | 1       | 91%        |
| Service user reported psychological distress | 11      | 0       | 100%       |
| Suicide completed                            | 9       | 2       | 82%        |
| QoL                                          | 9       | 2       | 82%        |
| Reoccurrence                                 | 4       | 7       | 36%        |



|                                                                   |   |    |     |
|-------------------------------------------------------------------|---|----|-----|
| Mental Health and Illness                                         | 8 | 3  | 73% |
| Service user involvement in decision making                       | 7 | 4  | 64% |
| Personal Recovery                                                 | 6 | 5  | 55% |
| Meaningful Activity                                               | 1 | 10 | 9%  |
| Functioning                                                       | 1 | 10 | 9%  |
| Clinician Reported Mental Health                                  | 5 | 6  | 45% |
| Service User Satisfaction with information provision at discharge | 3 | 8  | 27% |
| Service user understanding of the discharge plan                  | 3 | 8  | 27% |
| Suicide Attempted                                                 | 3 | 8  | 27% |
| Service User Involvement in Discharge Planning                    | 6 | 5  | 55% |
| Knowledge of how to access support in a crisis                    | 5 | 6  | 45% |
| Discharge to appropriate accommodation                            | 0 | 11 | 0%  |

<insert figure 2>

#### Stage 4: Preliminary Measurement Recommendations

Forty-three of the 93 invited participants responded in the final round (15 service users, 8 family members/carers, 23 researchers, 10 healthcare professionals, 3 end users of research), although as in previous rounds these were not distinct categories. Fifty-three percent of the respondents were researchers, this was expected as in the email we suggested that this stage may be more meaningful or of interest to this group, but as a team we chose not to exclude other groups with opinions on measurement instruments. Twenty-three percent of participants were international researchers (from USA, Switzerland, Canada, and Australia). Table 4 shows the preliminary minimum measure recommendations and time markers, additional file 5 shows the results upon which the recommendations were based.

Table 4: Summary of Measurement Recommendations

| Core Outcome      | Instrument/Measure                          | Time Marker                 |
|-------------------|---------------------------------------------|-----------------------------|
| Readmission       | Retrospective review of administrative data | Within 28 days of discharge |
| Suicide Completed | Retrospective review of administrative data | Within 28 days of discharge |

|                        |                                      |                          |
|------------------------|--------------------------------------|--------------------------|
| Psychological Distress | Kessler Psychological Distress (K10) | One month post-discharge |
| Quality of Life        | ReQoL-10                             | One month post-discharge |

### 1. Readmission

A minimum recommendation of using retrospective review of administrative data for readmissions within a defined time period, the most agreed was 28 days. Participants indicated that routine data collection might cover slightly different time periods. Twenty-six of the 43 participants recommended a measure of around a month (1 month, 30 days or 28 days) with 28 days being this most popular. However, they also advise that this should be supplemented either by cross-checking with service-users, case managers or carers, where possible to improve quality of data. Those looking for more comprehensive data may also like to record 7 days, 3 months and 6 months as these were also popular recommendations.

### 2. Quality of Life

The participants recommended that researchers use the Recovering Quality of Life (ReQoL-10) at one month post-discharge [35]. This was the most recommended instrument by the group. However, many participants also voted for ReQoL 20, a large proportion of the group suggested this outcome. As this is a quality of life measure specific to mental health recovery they felt this is most appropriate. The one month time marker is in-keeping with the other COS time frames, making a more comprehensive and accessible core outcome set. Those using within-participant measures of quality of life may like to also measure a pre-discharge baseline. Researchers looking for more thorough assessment of quality of life may like to also measure at 7 days post-discharge and 3 months, as these were also highly recommended time markers or use the ReQoL 20 and report both scores for comparability.

### 3. Suicide Completed

The participants recommended retrospective review of administrative data, for suicide completed within 28 days of discharge. Retrospective review is in line with other outcomes and was marginally the highest suggestion. We chose within 28 days for consistency with readmission data. Researchers looking for more comprehensive data may want to use 7 days and 3 months as these were highly recommended also. They may also want to cross-check this information against other sources (carers/case managers) to ensure it is correct and reported, particularly as participants mentioned the impact of incorrect coroner's reports on such data.

### 4. Psychological Distress

The participants recommended Kessler Psychological Distress (K10) one month post-discharge [36]. For consistency with other outcomes we recommend measure at one month. Seven days and 3 months are also highly recommended, so we would recommend these for research that is more robust. Although there were very few votes for instruments for psychological distress and qualitative comments revealed that participants felt this is not measurable. The same amount of people who voted for K10 also voted for interviews or other measures and a similar amount recommended the development of a new measure, CORE-10 was similarly close [37]. Whilst we make this recommendation, we also



1  
2  
3 suggest that future researchers may look to develop something specific for Psychological  
4 Distress in this core outcome set. Interviews would not effectively facilitate the between  
5 study comparison, the key purpose of a COS.  
6  
7

## 8 **Discussion**

9  
10  
11 This study provides the first international consensus on outcomes for intervention studies  
12 concerning discharge from an acute adult mental health inpatient setting. We could not  
13 identify any other published core outcome sets for interventions concerning discharge from  
14 acute mental health services. Moreover, there are very few core outcome sets for mental  
15 health, despite recommendations for consensus in the literature [20,23]. All the included  
16 outcomes were identified as critically important by more than 75% of a group of relatively  
17 equally-represented service-users and family/carers, health-care professionals, researchers  
18 and end-user of research using consensus methods. We recommend that all future research  
19 studies evaluating interventions for discharge from acute adult mental health settings use this  
20 core outcome set as a framework for outcome selection, to compliment, rather than replace  
21 any other outcomes that are relevant to their research question. We suggest that researchers  
22 can and should chose other outcomes related to their own research question in addition to  
23 these four items. As discharge from acute services is a particularly challenging period for  
24 those experiencing mental health problems [3,34], it's important to understand what  
25 interventions work and more specifically which elements of an intervention improve which  
26 particular outcomes. This core outcome set provides a framework for between-study  
27 comparison, ultimately enabling researchers to articulate the theory of change that underpins  
28 interventions.  
29  
30  
31  
32

33 In our systematic review [1], we identified 22 studies that reported readmission rates as an  
34 outcome, yet almost all of them captured this in different ways: some used self-report data,  
35 some clinical case notes or some retrospective administrative data, others used case  
36 manager's reports. In addition the time markers were variable, some used country specific  
37 time markers in line with policy such as 28 days in the UK [38], whilst others chose a series  
38 of time markers such as within 1 month, 3 month and 6 months, but the time markers were  
39 rarely directly comparable. Similarly, six studies measured quality of life but, only two used  
40 the same measurement instrument (Lehman's Quality of Life) [16,39]. In the current study,  
41 we have developed consensus that Quality of Life and Readmission are important and  
42 feasible to measure, but we also make recommendations about how to measure them to  
43 improve heterogeneity of outcome reporting.  
44  
45  
46

47 There were some unexpected exclusions in the core outcome set, for example mental health  
48 symptoms and treatment adherence were quite frequently used in past research [1], but not  
49 included in the core outcome set. At the beginning of the paper we described the recent Kings  
50 Fund report that suggested generating agreement amongst healthcare professionals, service  
51 users, policy makers and researchers is a difficult but imperative task [23]. We found this  
52 reflected here and feel that the small four-item core outcome set represents the only outcomes  
53 that are unanimously agreed upon as essential, despite so many outcomes being of upmost  
54 importance to service-users and families. This research has further highlighted the importance  
55 of shared decision making and service-user and family involvement to all stakeholder groups  
56 [40]. This consensus study indicates a desire from all groups to monitor levels of service-users  
57 satisfaction and involvement in the process. Whilst such outcomes, were excluded in later  
58 stages, primarily on the basis of being process variables/outcomes, it does not reduce their  
59  
60

1  
2  
3 prospective importance in discharge interventions or provision of care at discharge. The five  
4 most agreed upon elements of service-user involvement and satisfaction in discharge were:  
5 Service user involvement in discharge planning; Service user understanding of discharge  
6 plan; Service user involvement in decision making; Service user satisfaction with information  
7 provision at discharge; Service user knowledge of how to access community support. We  
8 recommend that future policy makers and healthcare management consider incorporating all  
9 of these elements into local level initiatives as overriding principles of care rather than  
10 interventions/measures, if they are ever missing from current provision. Furthermore, work  
11 highlighting the importance of involving service users in mental health care planning is  
12 beginning to emerge, along with measures of such activity. Therefore, we suggest that future  
13 research wherever possible should include a service user reported outcome measure of  
14 involvement alongside the 4-item core outcome set and any other chosen measures. This  
15 could be measured in an existing instrument of service-user involvement care planning in  
16 mental health, such as the EQUIP PROM (Patient Reported Outcome Measure) [40], or use  
17 the 6 outcomes presented above to develop a self-reported Likert measure of service user  
18 involvement specifically in discharge planning, as these 6 items are developed from synthesis  
19 of academic literature, qualitative questionnaires and met criteria for consensus amongst  
20 experts, so from a psychometric perspective would arguably meet initial face and content  
21 validity criteria [41], see additional file 6.  
22  
23  
24  
25

26 The difficulties of developing a mental health core outcome set was further epitomised when  
27 applied to care transitions: a service-level (rather than specific clinical population) multi-  
28 agency, multi-stage, complex period of the care pathway [3,24]. Generating a set of  
29 meaningful applicable outcomes that span primary and secondary care, across multiple  
30 physical locations, that are relevant for every service user was imperative. For example, a  
31 great deal of past literature focuses on housing interventions [42–44], and whilst housing is a  
32 significant safety issue at discharge, it's not necessarily relevant to all service users. This  
33 multi-agency, multi-morbidity complexity was arguably one factor that resulted in the small  
34 set of generic outcomes, that arguably differs from narrowly defined clinical core outcome set  
35 reported in past literature of many more outcomes [45,46].  
36  
37  
38

39 This study had several strengths. Our method is based on recommendations from an  
40 international panel of experts [25]. Inclusion of service-users and health-care professionals at  
41 every stage ensured that outcomes in the final core set embody shared priorities. The  
42 comprehensive and laborious long-list process ensured all potential outcomes were  
43 considered in the course of the consensus process. However, there were some limitations to  
44 our study. The research was only conducted in English, due to budgetary constraints,  
45 although our online rounds included participants from 12 countries. The attrition rate between  
46 the first questionnaire and the first Delphi round could be considered relatively high, however  
47 there was little attrition between consensus rounds. The group with the highest level of  
48 attrition after round one were service users and families and their replacements in round two  
49 were primarily researchers; which could have impacted on the results in round two.  
50 Furthermore, in many consensus meetings additional outcomes are often added, the method  
51 infrequently serves as means of reducing the number of outcomes included in the preliminary  
52 core outcome set from the Delphi [30]. However, in our case we found that the group did not  
53 agree with many of the outcomes and it was reduced to a very small COS of 4 items. This is  
54 beneficial in some ways, as we hope it is easier for researchers to operationalise a four-item  
55 core outcome set. However, to ensure that the spectrum of perceptions of safety by each  
56 group is addressed we recommend using the COS alongside an additional service user  
57  
58  
59  
60

1  
2  
3 reported outcome measure (PROM) that encompasses the other outcomes that had high  
4 consensus in the Delphi.  
5

6 We have made preliminary recommendations of measures and time markers for the four core  
7 outcomes, however we recommend that future research tests the feasibility and effectiveness  
8 of these measures, with an expectation that they may be revised. The recommendations may  
9 be UK-centric, given that only 23% of the panel were international researchers and 28 day  
10 readmission rate is in line with UK policy [38]. We therefore invite international researchers  
11 to test or comment on the feasibility of this core outcome set outside of the UK. There was  
12 also no concrete consensus on any measure or time-marker, therefore we have made  
13 recommendations informed by the predominant opinions of experts to ensure that the core  
14 outcome set can be operationalised immediately. We acknowledge that it will often be  
15 necessary for outcomes and measures to be adapted or augmented in future research to  
16 include additional or complementary items, but feel the necessity for homogeneity in  
17 outcome reporting is imminent.  
18  
19  
20

21 The use of outcomes in mental health research and service, is becoming more contested in  
22 terms of what is meaningful and effective, it could be argued that core outcomes sets are less  
23 applicable to mental health populations than general health populations, given the complexity  
24 of mental health problems and the subjectivity of measuring it. However, as core outcomes  
25 sets are relatively uncommon in mental health, we believe (similar to other clinical  
26 populations) a small, agreed, feasible set of core outcomes will facilitate between study  
27 comparability and advancement in evidence collection [21,25].  
28  
29

### 30 **Future Directions**

31  
32  
33 Development of this core outcome set involved participation of stakeholders from 12  
34 different countries; (primarily researchers) however, we recommend that further work should  
35 be undertaken to validate this core outcome set more widely, particularly in non-English  
36 speaking populations. The two of the final four outcomes and many of the preliminary 15  
37 outcomes to emerge from the Delphi, are not necessarily specific to mental health care  
38 transitions. Some outcomes are comparable to a similar core outcome set for care transitions  
39 of adolescents and young adults with special healthcare needs [47]. Future research may  
40 consider a 'transitions of care' core outcome set, to reduce the number of similar core  
41 outcome sets.  
42  
43

### 44 **Conclusion**

45  
46  
47 The four outcomes included in our outcome set represent the consensus opinion of a group of  
48 service-users, health-care professionals, and international researchers and addresses an unmet  
49 necessity: assisting researchers in the design, implementation and reporting of interventions  
50 that aim to improve discharge from acute mental health settings. Ultimately, application of  
51 this core outcome set will enhance the relevance of future interventions to health-care  
52 professionals, the research community and service-users. If used, the core outcome set could  
53 provide more evidenced-based interventions, underpinned by theory of change outlining the  
54 relationships between the component of the intervention and the outcome it should  
55 improve[1,48]; which should increase service-user safety at this distressing time period.  
56  
57  
58  
59  
60

## Patients' consent and permission to publish

All participants gave informed consent to be involved in the study ahead of data collection.

## Author Contributions

NT conceived the design of the study; conducted the literature search, meta-synthesis and Delphi; analysed the data; and drafted the majority of the manuscript. JW and NW contributed equally and provided oversight of the study design, analysed and synthesised the data and contributed significantly to the drafting of the manuscript. AG analysed and synthesised data, provided an expert by lived experience opinion on decisions made in regards to wording, study design, PPI involvement, also an contributed adaptations to the manuscript.

## Conflicts of Interest

The authors report no conflicts of interest

## Ethics Committee Approval

This research received a favourable ethics opinion from Nottingham University Business School Ethics Committee.

## Role of Funding Source

This research is funded by the NIHR Greater Manchester Patient Safety Translational Research Centre, they had no role in the writing of manuscript or decision to submit.

## Data Statement

Data is available upon reasonable request

**Word Count:** 5858

## References

- [1] Tyler N, Wright N, Waring J. Interventions to Improve Discharge from Acute Adult Mental Health Inpatient Care to the Community: Systematic Review and Narrative Synthesis. PRE-PRINT (Version 1) n.d.
- [2] Waring J, McDonald R, Harrison S. Safety and complexity: Inter-departmental relationships as a threat to patient safety in the operating department. *J Heal Organ Manag* 2006. doi:10.1108/14777260610662753.
- [3] Wright N, Rowley E, Chopra A, Gregoriou K, Waring J. From admission to discharge in mental health services: a qualitative analysis of service user involvement. *Heal Expect* 2016;19:367–76. doi:10.1111/hex.12361.
- [4] Walter F, Carr MJ, Mok PLH, Astrup A, Antonsen S, Pedersen CB, et al. Premature Mortality Among Patients Recently Discharged From Their First Inpatient Psychiatric

- 1  
2  
3 Treatment. *JAMA PSYCHIATRY* 2017;74:485–92.  
4 doi:10.1001/jamapsychiatry.2017.0071.
- 5 [5] Burns J, Flynn S, Lowe R, Turnbull P, Baird A, Stones P, et al. The National  
6 Confidential Inquiry into Suicide and Homicide by People with Mental Illness. 2017.
- 7 [6] O. A, M.N. M, A.L. B, J. M, B.A. N. Assessing need for pharmacist involvement to  
8 improve care coordination for patients on LAI antipsychotics transitioning from  
9 hospital to home: A work system approach. *Res Social Adm Pharm* 2017;13:1004–13.  
10 doi:http://dx.doi.org/10.1016/j.sapharm.2017.02.006.
- 11 [7] Exbrayat S, Coudrot C, Gourdon X, Gay A, Sevos J, Pellet J, et al. Effect of telephone  
12 follow-up on repeated suicide attempt in patients discharged from an emergency  
13 psychiatry department: a controlled study. *BMC Psychiatry* 2017;17.  
14 doi:10.1186/s12888-017-1258-6.
- 15 [8] Vigod SN, Kurdyak PA, Dennis C-L, Leszcz T, Taylor VH, Blumberger DM, et al.  
16 Transitional interventions to reduce early psychiatric readmissions in adults:  
17 systematic review. *Br J Psychiatry* 2013;202:187–94. doi:10.1192/bjp.bp.112.115030.
- 18 [9] Waring J, Bishop S, Marshall F, Tyler N, Vickers R. An ethnographic study comparing  
19 approaches to inter-professional knowledge sharing and learning in discharge planning  
20 and care transitions. *J Heal Organ Manag* n.d.
- 21 [10] Walker SA, Naji SA, Howie FL, Andrew J, Cameron IM, Eagles JM. The  
22 effectiveness of psychiatric discharge coordinators. *Prim Care Psychiatry* 2000.  
23 doi:10.1185/135525700543370.
- 24 [11] Bennewith O, Evans J, Donovan J, Paramasivan S, Owen-Smith A, Hollingworth W,  
25 et al. A Contact-Based Intervention for People Recently Discharged from Inpatient  
26 Psychiatric Care: A Pilot Study. *Arch Suicide Res* 2014.  
27 doi:10.1080/13811118.2013.838196.
- 28 [12] D'souza R. Improving Treatment Adherence and Longitudinal Outcomes in Patients  
29 with a Serious Mental Illness by Using Telemedicine. *J Telemed Telecare* 2002.  
30 doi:10.1177/1357633X020080S251.
- 31 [13] Exbrayat S, Coudrot C, Gourdon X, Gay A, Sevos J, Pellet J, et al. Effect of telephone  
32 follow-up on repeated suicide attempt in patients discharged from an emergency  
33 psychiatry department: A controlled study. *BMC Psychiatry* 2017.  
34 doi:10.1186/s12888-017-1258-6.
- 35 [14] Forchuk C, Martin ML, Chan YL, Jensen E. Therapeutic relationships: From  
36 psychiatric hospital to community. *J Psychiatr Ment Health Nurs* 2005.  
37 doi:10.1111/j.1365-2850.2005.00873.x.
- 38 [15] Juven-Wetzler A, Bar-Ziv D, Cwikel-Hamzany S, Abudy A, Peri N, Zohar J. A pilot  
39 study of the “Continuation of Care” model in “revolving-door” patients. *Eur*  
40 *Psychiatry* 2012. doi:10.1016/j.eurpsy.2011.05.003.
- 41 [16] Jensen E, Chapman P, Davis A, Forchuk C, Seymour B, Witcher P, et al. An  
42 Evaluation of Community-Based Discharge Planning in Acute Mental Health Care.  
43 *Can J Community Ment Heal* 2010;29:111–24. doi:10.7870/cjcmh-2010-0038.
- 44 [17] Shaffer SL, Hutchison SL, Ayers AM, Goldberg RW, Herman D, Duch DA, et al.  
45 Brief critical time intervention to reduce psychiatric rehospitalization. *Psychiatr Serv*  
46 2015;66:1155–61. doi:http://dx.doi.org/10.1176/appi.ps.201400362.
- 47 [18] Tomita A, Herman DB. The Impact of Critical Time Intervention in Reducing  
48 Psychiatric Rehospitalization After Hospital Discharge. *Psychiatr Serv* 2012.  
49 doi:10.1176/appi.ps.201100468.
- 50 [19] Steffen S, Kösters M, Becker T, Puschner B. Discharge planning in mental health care:  
51 A systematic review of the recent literature. *Acta Psychiatr Scand* 2009;120:1–9.  
52 doi:10.1111/j.1600-0447.2009.01373.x.
- 53  
54  
55  
56  
57  
58  
59  
60



- 1  
2  
3 [20] S. S, M. K, T. B. Discharge planning in mental health care: A systematic review of the  
4 recent literature. *Acta Psychiatr Scand* 2009;120:1–9.  
5 doi:<http://dx.doi.org/10.1111/j.1600-0447.2009.01373.x>.  
6 [21] Williamson PR, Altman DG, Bagley H, Barnes KL, Blazeby JM, Brookes ST, et al.  
7 The COMET Handbook: Version 1.0. *Trials* 2017. doi:10.1186/s13063-017-1978-4.  
8 [22] Williamson PR, Altman DG, Blazeby JM, Clarke M, Devane D, Gargon E, et al.  
9 Developing core outcome sets for clinical trials: Issues to consider. *Trials* 2012.  
10 doi:10.1186/1745-6215-13-132.  
11 [23] Lang K. Outcomes for mental health services: what really matters? | HSR UK. 2019.  
12 [24] Waring J, Marshall F, Bishop S, Sahota O, Walker M, Currie G, et al. An ethnographic  
13 study of knowledge sharing across the boundaries between care processes, services and  
14 organisations: the contributions to ‘safe’ hospital discharge. *Heal Serv Deliv Res* 2014.  
15 doi:10.3310/hsdr02290.  
16 [25] Kirkham JJ, Davis K, Altman DG, Blazeby JM, Clarke M, Tunis S, et al. Core  
17 Outcome Set-STAndards for Development: The COS-STAD recommendations. *PLoS*  
18 *Med* 2017. doi:10.1371/journal.pmed.1002447.  
19 [26] Pedersen ER, Helmuth ED, Marshall GN, Schell TL, PunKay M, Kurz J. Using  
20 Facebook to Recruit Young Adult Veterans: Online Mental Health Research. *JMIR*  
21 *Res Protoc* 2015. doi:10.2196/resprot.3996.  
22 [27] CONTRIBUTED TALKS. *J Evid Based Med* 2019;12:24–7. doi:10.1111/jebm.12336.  
23 [28] Thomas J, Harden A. Methods for the thematic synthesis of qualitative research in  
24 systematic reviews. *BMC Med Res Methodol* 2008;8:45. doi:10.1186/1471-2288-8-45.  
25 [29] Qualtrics. Qualtrics: The World’s Leading Research & Insights Platform. Qualtrics  
26 2016. doi:10.3109/03639045.2013.790903.  
27 [30] Hsu C, Sandford B. The delphi technique: making sense of consensus. *Pract*  
28 *Assessment, Res Eval* 2007;12:1–8. doi:10.1016/S0169-2070(99)00018-7.  
29 [31] Kirkham JJ, Gorst S, Altman DG, Blazeby J, Clarke M, Devane D, et al. COS-STAR:  
30 A reporting guideline for studies developing core outcome sets (protocol). *Trials* 2015.  
31 doi:10.1186/s13063-015-0913-9.  
32 [32] Bell BG, Spencer R, Avery AJ, Campbell SM. Tools for measuring patient safety in  
33 primary care settings using the RAND/UCLA appropriateness method. *BMC Fam*  
34 *Pract* 2014;15:110. doi:10.1186/1471-2296-15-110.  
35 [33] Avery AJ, Dex GM, Mulvaney C, Serumaga B, Spencer R, Lester HE, et al.  
36 Development of prescribing-safety indicators for GPs using the RAND  
37 Appropriateness Method. *Br J Gen Pract* 2011;61:e526–36.  
38 doi:10.3399/bjgp11X588501.  
39 [34] Walter F, Carr MJ, Mok PLH, Antonsen S, Pedersen CB, Shaw J, et al. Suicide  
40 Methods and Specific Types of Accidental Death and Fatal Poisoning Among  
41 Discharged Psychiatric Patients: A National Cohort Study. *J Clin Psychiatry* 2018;79.  
42 doi:10.4088/JCP.17m11809.  
43 [35] Keetharuth AD, Brazier J, Connell J, Bjorner JB, Carlton J, Buck ET, et al. Recovering  
44 Quality of Life (ReQoL): A new generic self-reported outcome measure for use with  
45 people experiencing mental health difficulties. *Br J Psychiatry* 2018.  
46 doi:10.1192/bjp.2017.10.  
47 [36] Andrews G, Slade T. Interpreting scores on the Kessler Psychological Distress Scale  
48 (K10). *Aust N Z J Public Health* 2001. doi:10.1111/j.1467-842X.2001.tb00310.x.  
49 [37] Barkham M, Bewick B, Mullin T, Gilbody S, Connell J, Cahill J, et al. The CORE-10:  
50 A short measure of psychological distress for routine use in the psychological  
51 therapies. *Couns Psychother Res* 2013. doi:10.1080/14733145.2012.729069.  
52 [38] Ali AM, Bottle A. How do we interpret readmission rates? *BMJ* 2018.  
53  
54  
55  
56  
57  
58  
59  
60

- 1  
2  
3 doi:10.1136/bmj.k3104.
- 4 [39] Tomita A, Lukens EP, Herman DB. Mediation analysis of critical time intervention for  
5 persons living with serious mental illnesses: assessing the role of family relations in  
6 reducing psychiatric rehospitalization. *Psychiatr Rehabil J* 2014;37:4–10.  
7 doi:10.1037/prj0000015.
- 8 [40] Lovell K, Bee P, Brooks H, Cahoon P, Callaghan P, Carter L-A, et al. Embedding  
9 shared decision-making in the care of patients with severe and enduring mental health  
10 problems: The EQUIP pragmatic cluster randomised trial. *PLoS One*  
11 2018;13:e0201533. doi:10.1371/journal.pone.0201533.
- 12 [41] Falzarano M, health GZ-J of allied, 2013 undefined. Seeking consensus through the  
13 use of the Delphi technique in health sciences research. *IngentaconnectCom* n.d.
- 14 [42] C. F, G. R, S. K-M, K. T. From psychiatric ward to the streets and shelters. *J Psychiatr*  
15 *Ment Health Nurs* 2006;13:301–8. doi:http://dx.doi.org/10.1111/j.1365-  
16 2850.2006.00954.x.
- 17 [43] Forchuk C, Godin M, Hoch JS, Kingston-MacClure S, Jeng M (Mo) S, Puddy L, et al.  
18 Preventing Homelessness After Discharge from Psychiatric Wards: Perspectives of  
19 Consumers and Staff. *J Psychosoc Nurs Ment Health Serv* 2013;51:24–31.  
20 doi:10.3928/02793695-20130130-02.
- 21 [44] Tomita A, Herman DB. The Role of a Critical Time Intervention on the Experience of  
22 Continuity of Care Among Persons With Severe Mental Illness After Hospital  
23 Discharge. *J Nerv Ment Dis* 2015;203:65–70. doi:10.1097/NMD.0000000000000224.
- 24 [45] Fish R, Sanders C, Adams R, Brewer J, Brookes ST, DeNardo J, et al. A core outcome  
25 set for clinical trials of chemoradiotherapy interventions for anal cancer (CORMAC): a  
26 patient and health-care professional consensus. *Lancet Gastroenterol Hepatol* 2018.  
27 doi:10.1016/S2468-1253(18)30264-4.
- 28 [46] Boers M, Brooks P, Simon LS, Strand V, Tugwell P. OMERACT: An international  
29 initiative to improve outcome measurement in rheumatology. *Clin Exp Rheumatol*  
30 2005;23. doi:10.1186/1745-6215-8-38.
- 31 [47] Fair C, Cuttance J, Sharma N, Maslow G, Wiener L, Betz C, et al. International and  
32 Interdisciplinary Identification of Health Care Transition Outcomes. *JAMA Pediatr*  
33 2016;170:205. doi:10.1001/jamapediatrics.2015.3168.
- 34 [48] Davidoff F, Dixon-Woods M, Leviton L, Michie S. Demystifying theory and its use in  
35 improvement. *BMJ Qual Saf* 2015;24:228–38. doi:10.1136/bmjqs-2014-003627.
- 36  
37  
38  
39  
40  
41  
42  
43  
44  
45  
46  
47  
48  
49  
50  
51  
52  
53  
54  
55  
56  
57  
58  
59  
60

1  
2  
3  
4  
5  
6  
7  
8  
9  
10  
11  
12  
13  
14  
15  
16  
17  
18  
19  
20  
21  
22  
23  
24  
25  
26  
27  
28  
29  
30  
31  
32  
33  
34  
35  
36  
37  
38  
39  
40  
41  
42  
43  
44  
45  
46  
47  
48  
49  
50  
51  
52  
53  
54  
55  
56  
57  
58  
59  
60

Formatted: Font: (Default) Times New Roman

- Core Outcome Set
1. Readmission
  2. Quality of Life
  3. Suicide Completed
  4. Service User Reported Psychological Distress

For peer review only



1  
2  
3  
4  
5  
6  
7  
8  
9  
10  
11  
12  
13  
14  
15  
16  
17  
18  
19  
20  
21  
22  
23  
24  
25  
26  
27  
28  
29  
30  
31  
32  
33  
34  
35  
36  
37  
38  
39  
40  
41  
42  
43  
44  
45  
46  
47  
48  
49  
50  
51  
52  
53  
54  
55  
56  
57  
58  
59  
60

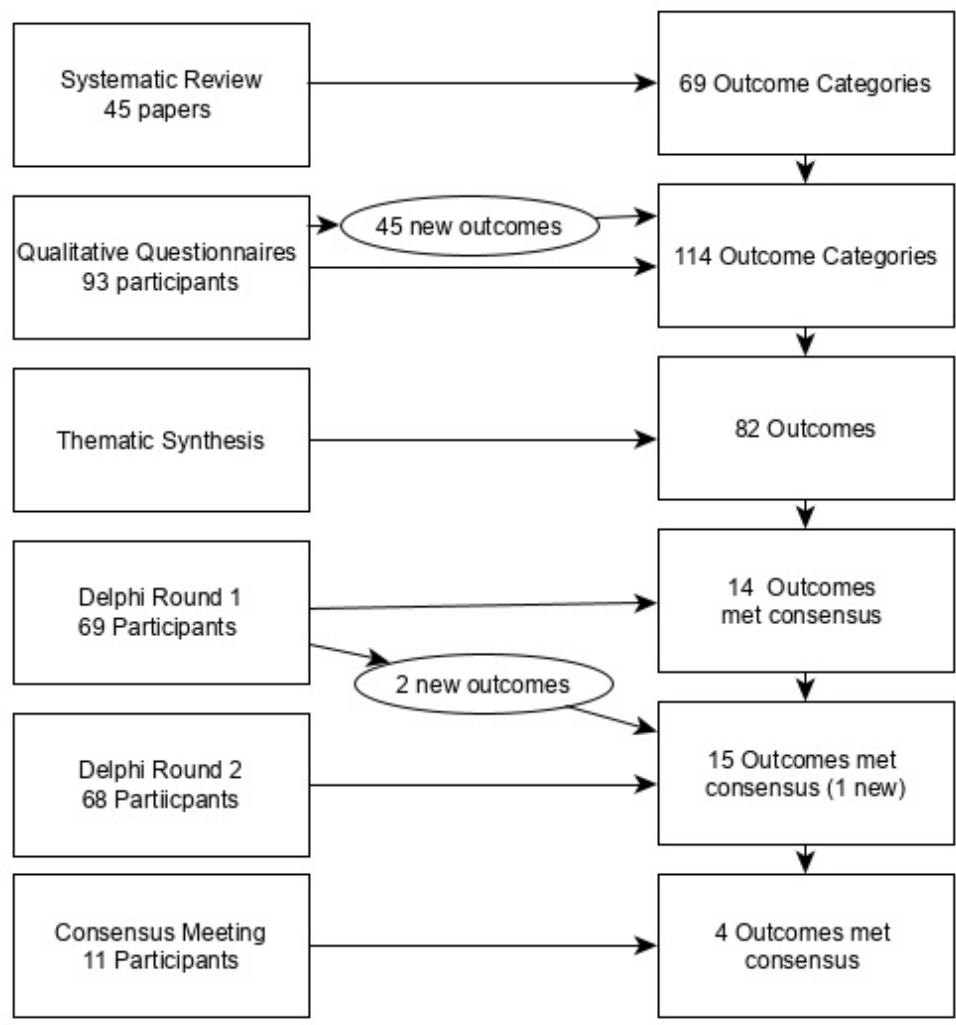

Process of reducing the outcomes to a set of four core outcomes

133x142mm (96 x 96 DPI)

## Supplementary Material

**File 1: Table of questions asked in qualitative questionnaire**

| Group                      | Question                                                                                                                                                      |
|----------------------------|---------------------------------------------------------------------------------------------------------------------------------------------------------------|
| All Participants           | What would make discharge from an acute mental health ward <b>safe</b> in your opinion?                                                                       |
| All Participants           | What would make discharge from an acute mental health ward <b>effective</b> in your opinion?                                                                  |
| All Participants           | What would you like to see prioritised for research into discharge from an acute ward?                                                                        |
| All Participants           | Can you think of any important outcomes to measure in research assessing discharge interventions?                                                             |
| Service User               | What do you think is the most difficult aspect of discharge from a mental health acute ward?                                                                  |
| Service User               | What might improve discharge from a mental health ward?                                                                                                       |
| Service User               | Was there any one person/group/intervention which really made a difference for you? If so what was it? What made it so powerful?                              |
| Service User               | Do you have any other feelings or concerns not addressed in previous questions?                                                                               |
| Family member/carer        | What do you consider to be the most difficult components of discharge for your family member/friend from an acute mental health ward?                         |
| Family member/carer        | What types of improvement would you expect to see in your family member/friend following a successful discharge from an acute mental health ward?             |
| Mental health professional | What do you consider to be the most difficult aspects of discharge from an acute unit for your service-users?                                                 |
| Mental health professional | Are there any changes/behaviours you would expect to see in a service-user during or following a safe and/or effective discharge?                             |
| Researchers                | If applicable, what outcomes did you measure in past research (of discharge interventions)?                                                                   |
| Researchers                | Are there any concepts that you think are important to measure, but chose not to, due to not having a suitable measurement instrument?                        |
| End users of research      | If you were looking to use research to inform changes to the discharge procedure within your professional role, what outcomes would you like to see reported? |
| End users of research      | In your opinion, what measurements would persuade you that a discharge intervention is effective?                                                             |

## File 2: Results of Meta-synthesis of Outcomes and data from questionnaire

### Clinical

| From Review                     | Additional from Meta-synthesis                                             |
|---------------------------------|----------------------------------------------------------------------------|
| Reoccurrence (i.e. Relapse)     | Stability                                                                  |
| Clinical Recovery               | Physical Health and Wellbeing                                              |
| Personal Recovery               | Iatrogenic harm (patient safety incidents- harm caused by the care system) |
| Substance Misuse (inc. alcohol) | Serious accidental injury                                                  |
| Self-injury (i.e. harm to self) | Mortality                                                                  |
| Suicide Risk                    | Mental health and illness (symptoms/psychological distress)                |
| Suicidal Ideation               |                                                                            |
| Suicide Attempted               |                                                                            |
| Suicide Completed               |                                                                            |
| Medication Knowledge            |                                                                            |
| Medication Adherence            |                                                                            |
| Medication Side Effects         |                                                                            |
| Medication Management           |                                                                            |
| Global Functioning              |                                                                            |

### Service

| From Review                                                  | Additional from Meta-synthesis                                            |
|--------------------------------------------------------------|---------------------------------------------------------------------------|
| Emergency department visits post discharge                   | Police intervention post discharge                                        |
| Readmission                                                  | Engagement with psychological intervention                                |
| Length of stay pre-discharge                                 | Engagement with community services                                        |
| Length of stay post-discharge (i.e. subsequent readmissions) | Availability of appropriate community support (i.e. allocated key worker) |
| Outpatient appointment/visit adherence                       | Length of time before follow up/aftercare                                 |
| Service use                                                  | Leaving the hospital against medical advice                               |
|                                                              | Service user involvement in decision making (shared decision making)      |
|                                                              | Serious incidents (i.e. serious incidents reported formally)              |

### Satisfaction

| From Review                                    | Additional from Meta-synthesis                                                                                       |
|------------------------------------------------|----------------------------------------------------------------------------------------------------------------------|
| Service user expectations of care              | Professionals/care teams satisfaction with information provision at discharge                                        |
| Service user satisfaction with discharge       | Service user satisfaction with information provision at discharge (e.g. regarding medication, risk, crisis planning) |
| Service user experience of discharge           |                                                                                                                      |
| Service user satisfaction with treatment       |                                                                                                                      |
| Carer/family/other satisfaction with discharge |                                                                                                                      |
| Staff satisfaction with discharge              |                                                                                                                      |

### Personal

| From Review                                              | Additional from Meta-synthesis                                                    |
|----------------------------------------------------------|-----------------------------------------------------------------------------------|
| Hopelessness                                             | Feelings of safety                                                                |
| Boredom                                                  | Feelings of support (from various groups- i.e. family, professionals and friends) |
| Loneliness                                               | Experience of stigma                                                              |
| Isolation                                                | Quality of interpersonal relationships (friends and family)                       |
| Coping skills                                            | Self-management                                                                   |
| Concern/anxiety about discharge                          |                                                                                   |
| Autonomy (e.g. independence, autonomous decision making) |                                                                                   |

|                                                |  |
|------------------------------------------------|--|
| Housing Stability                              |  |
| Discharge to appropriate accommodation         |  |
| Service user knowledge of own condition        |  |
| Quality of life                                |  |
| Community participation                        |  |
| Violence                                       |  |
| Aggression                                     |  |
| Victim of crime                                |  |
| Stable relationships with health professionals |  |
| Employment                                     |  |

### Discharge Planning

| From Review | Additional from Meta-synthesis                                                                                            |
|-------------|---------------------------------------------------------------------------------------------------------------------------|
|             | Service user involvement in discharge planning                                                                            |
|             | Family/carer involvement in discharge planning                                                                            |
|             | Advocate involvement in discharge planning                                                                                |
|             | Completion of planned care                                                                                                |
|             | Continuity of contact                                                                                                     |
|             | Service user readiness for discharge (incl. preparation)                                                                  |
|             | Clinical readiness for discharge                                                                                          |
|             | Experience of coercion at discharge (e.g. feeling forced to leave)                                                        |
|             | Provision of financial support (e.g. benefits advice, debt advice)                                                        |
|             | Delays in expected discharge                                                                                              |
|             | Service availability (e.g. availability of community services, CPN, follow-up, social worker, bed in residential service) |
|             | Family/carer/other readiness for discharge                                                                                |
|             | Staff understanding of safe and effective discharge                                                                       |
|             | Plan for community engagement                                                                                             |
|             | Is there a plan for care post discharge created                                                                           |
|             | Has the plan for care post-discharge been communicated with patient                                                       |
|             | Has information about the discharge been reported to other relevant services                                              |

### Changes/Combinations

| Outcomes from Review                  | Changes/Combinations                                                          |
|---------------------------------------|-------------------------------------------------------------------------------|
| Social Recovery                       | Combined into quality of interpersonal relationships                          |
| Relapse                               | PPI suggestion change to reoccurrence                                         |
| Self-harm                             | PPI suggestion change to self-injury                                          |
| Depression                            | Combined into symptoms                                                        |
| Anxiety                               | Combined into symptoms                                                        |
| Illegal drug use                      | Combined into substance misuse                                                |
| Alcohol use                           | Combined into substance misuse                                                |
| Addiction severity                    | Combined into substance misuse                                                |
| Crisis planning                       | Combined into information provision                                           |
| Risk communication                    | Combined into information provision                                           |
| Allocated worker                      | Combined into availability of appropriate community support                   |
| Better knowledge transfer             | Combined into information provision (professional)                            |
| Therapeutic alliance                  | Combined into stable relationships with HPs                                   |
| Contact with ambulatory care          | Combined into emergency visits                                                |
| Treatment adherence                   | Combined into medication adherence and engagement with psychological services |
| 7 day follow up                       | Changed to length of time before follow up for global audience                |
| Psychological distress                | Combined into symptoms                                                        |
| Family relations                      | Combined into quality of interpersonal relationships                          |
| Community integration and functioning | Combined into Community participation                                         |

### Outcomes Removed from Process

| Outcomes from Review      | Reason       |
|---------------------------|--------------|
| Antipsychotic Politherapy | Too specific |
| Autistic life             | Too specific |

|                                        |                           |
|----------------------------------------|---------------------------|
| Medication Problems                    | Too vague                 |
| Functional Recovery                    | Meaning not explicit      |
| Satisfaction with service in community | Not relevant for this COS |
| Global satisfaction with discharge     | Meaning not explicit      |
| Quality of care                        | Too vague                 |
| Treatment decision making              | Not relevant for this COS |
| Financial cost to provider             | Impossible to measure     |
| Number of beds                         | Too vague                 |
| Staff workload                         | Too vague                 |
| Freedom                                | Too vague                 |
| Self-activity                          | Too vague                 |

#### Carer outcomes

| Outcomes from Review               | Decision                 |
|------------------------------------|--------------------------|
| Caregiver Burden                   | Yes                      |
| Caregiver Health Status            | No (too specific)        |
| Caregiver Knowledge about illness  | Yes                      |
| <b>From Synthesis</b>              |                          |
| Carer support                      | No                       |
| Relationship between family and SU | No (probably a variable) |

File 3: Participant Demographics

| Categories |               |                     |                          |             |                       |            |            |            |       |               |                          |  |
|------------|---------------|---------------------|--------------------------|-------------|-----------------------|------------|------------|------------|-------|---------------|--------------------------|--|
| Group      | Service Users | Families and Carers | Healthcare Professionals | Researchers | End-users of Research |            |            |            |       |               |                          |  |
| <b>n</b>   | 27            | 17                  | 39                       | 37          | 15                    |            |            |            |       |               |                          |  |
| Gender     | Male          | Female              | Other                    |             |                       |            |            |            |       |               |                          |  |
| <b>n</b>   | 28            | 63                  | 0                        |             |                       |            |            |            |       |               |                          |  |
| Age        | 18-24         | 25-34               | 35-44                    | 45-54       | 55-64                 | 65-74      | 75-84      |            |       |               |                          |  |
| <b>n</b>   | 4             | 20                  | 30                       | 24          | 10                    | 4          | 1          |            |       |               |                          |  |
| Location   | International | East of England     | East Midlands            | London      | North West            | North East | South East | South West | Wales | West Midlands | Yorkshire and the Humber |  |
| <b>n</b>   | 24            | 2                   | 11                       | 7           | 16                    | 1          | 6          | 5          | 0     | 13            | 7                        |  |

Locations for International participants

| Country          | N |
|------------------|---|
| Australia        | 4 |
| Canada           | 2 |
| China            | 1 |
| France           | 1 |
| Germany          | 1 |
| Iran             | 1 |
| Italy            | 1 |
| Northern Ireland | 1 |
| South Africa     | 1 |
| Switzerland      | 4 |
| USA              | 7 |

File 4: Full list of Delphi outcomes, consensus levels, and round of inclusion/exclusion

|                                                                                                                      | R1 Percentage agreement | R1 Percentage Disagreement | Median | Researchers | Sus and carers | HCPs and DMs | Round 2 Status | Round 2 | Researcher | Sus and carers | HCP and DMs | Median |
|----------------------------------------------------------------------------------------------------------------------|-------------------------|----------------------------|--------|-------------|----------------|--------------|----------------|---------|------------|----------------|-------------|--------|
| Service user involvement in discharge planning (inc. feeling listened to)                                            | 87%                     | 4%                         | 7      | 65%         | 100%           | 95%          | Include        |         |            |                |             |        |
| Functioning (health, social, etc.)                                                                                   | 83%                     | 3%                         | 6      | 69%         | 100%           | 81%          | Include        |         |            |                |             |        |
| Mental health and illness (symptom/psychological distress)                                                           | 83%                     | 3%                         | 6      | 73%         | 91%            | 86%          | Include        |         |            |                |             |        |
| Personal Recovery                                                                                                    | 82%                     | 1%                         | 6      | 75%         | 86%            | 86%          | Include        |         |            |                |             |        |
| service user understanding of discharge plan                                                                         | 81%                     | 3%                         | 6      | 65%         | 91%            | 86%          | Include        |         |            |                |             |        |
| Quality of life                                                                                                      | 81%                     | 1%                         | 6.5    | 65%         | 90%            | 86%          | Include        |         |            |                |             |        |
| suicide Completed                                                                                                    | 80%                     | 4%                         | 7      | 80%         | 90%            | 68%          | Include        |         |            |                |             |        |
| Readmission                                                                                                          | 80%                     | 6%                         | 6      | 77%         | 77%            | 86%          | Include        |         |            |                |             |        |
| service user involvement in decision making (shared decision making)                                                 | 77%                     | 4%                         | 7      | 50%         | 95%            | 86%          | Include        |         |            |                |             |        |
| service user satisfaction with information provision at discharge (e.g. regarding medication, risk, crisis planning) | 77%                     | 6%                         | 6      | 65%         | 86%            | 81%          | Include        |         |            |                |             |        |
| service user knowledge of how to access community support (i.e. in an emergency)                                     | 77%                     | 3%                         | 6      | 58%         | 91%            | 86%          | Include        |         |            |                |             |        |
| Recurrence (i.e. relapse)                                                                                            | 75%                     | 1%                         | 6      | 58%         | 91%            | 76%          | Include        |         |            |                |             |        |
| Suicide Attempted                                                                                                    | 75%                     | 4%                         | 6      | 62%         | 86%            | 81%          | Include        |         |            |                |             |        |
| discharge to appropriate accommodation                                                                               | 75%                     | 3%                         | 6      | 69%         | 91%            | 67%          | Include        |         |            |                |             |        |
| service user satisfaction with treatment                                                                             | 74%                     | 7%                         | 6      | 58%         | 91%            | 71%          | Re-present     | 59%     | 43%        | 67%            | 70%         | 6      |
| service Availability (e.g. availability of community service, CPN, follow-up, social worker,                         | 74%                     | 7%                         | 6      | 46%         | 86%            | 95%          | Re-present     | 45%     | 27%        | 67%            | 50%         | 5      |

|                                                                                  |     |     |   |     |     |     |            |     |     |     |     |   |  |
|----------------------------------------------------------------------------------|-----|-----|---|-----|-----|-----|------------|-----|-----|-----|-----|---|--|
| bed in residential service)                                                      |     |     |   |     |     |     |            |     |     |     |     |   |  |
| Existence of a plan for community engagement/ care post discharge                | 74% | 4%  | 6 | 58% | 77% | 90% | Re-present | 72% | 57% | 83% | 90% | 6 |  |
| Feeling of support (from various group i.e. family, professional, friends)       | 72% | 4%  | 6 | 65% | 77% | 71% | Re-present | 43% | 33% | 50% | 50% | 5 |  |
| Suicide Risk                                                                     | 71% | 3%  | 6 | 58% | 77% | 81% | Re-present | 42% | 43% | 56% | 25% | 5 |  |
| Family/carer/other involvement in discharge planning (inc. feeling listened too) | 71% | 6%  | 6 | 65% | 77% | 75% | Re-present | 58% | 50% | 67% | 65% | 6 |  |
| service user readiness for discharge (incl. preparation)                         | 71% | 6%  | 6 | 58% | 77% | 81% | Re-present | 35% | 27% | 50% | 30% | 5 |  |
| Feeling of safety                                                                | 70% | 7%  | 6 | 65% | 73% | 71% | Re-present | 36% | 37% | 56% | 25% | 5 |  |
| service user satisfaction with discharge                                         | 69% | 4%  | 6 | 50% | 76% | 86% | Re-present | 45% | 40% | 50% | 50% | 5 |  |
| Physical Health and Wellbeing                                                    | 68% | 3%  | 6 | 50% | 77% | 81% | Re-present | 49% | 43% | 61% | 45% | 5 |  |
| service user experience of discharge                                             | 68% | 10% | 6 | 46% | 86% | 76% | Re-present | 29% | 23% | 44% | 30% | 5 |  |
| Housing stability                                                                | 68% | 3%  | 6 | 62% | 77% | 67% | Re-present | 41% | 37% | 39% | 40% | 5 |  |
| Coping skills                                                                    | 68% | 6%  | 6 | 50% | 77% | 80% | Re-present | 39% | 40% | 50% | 35% | 5 |  |
| Continuity of contact                                                            | 68% | 6%  | 6 | 64% | 77% | 62% | Re-present | 65% | 63% | 72% | 60% | 6 |  |
| Mortality                                                                        | 67% | 7%  | 6 | 68% | 76% | 57% | Re-present | 42% | 43% | 50% | 30% | 5 |  |
| self management                                                                  | 67% | 4%  | 6 | 46% | 86% | 71% | Re-present | 29% | 23% | 39% | 20% | 5 |  |
| Length of time before follow up/aftercare                                        | 65% | 6%  | 6 | 46% | 77% | 76% | Re-present | 58% | 43% | 83% | 65% | 6 |  |
| Isolation                                                                        | 65% | 9%  | 6 | 46% | 73% | 81% | Re-present | 55% | 50% | 72% | 45% | 6 |  |
| Availability of appropriate community support (i.e. allocated key worker)        | 64% | 9%  | 6 | 38% | 82% | 76% | Re-present | 52% | 27% | 72% | 70% | 6 |  |
| service user knowledge of own condition                                          | 64% | 6%  | 6 | 42% | 91% | 62% | Re-present | 36% | 30% | 50% | 35% | 4 |  |
| service user expectation of care                                                 | 63% | 3%  | 6 | 35% | 76% | 81% | Re-present | 28% | 20% | 28% | 40% | 4 |  |
| Hopelessness                                                                     | 63% | 9%  | 6 | 54% | 67% | 71% | Re-present | 46% | 47% | 44% | 45% | 5 |  |
| suicidal Ideation                                                                | 62% | 7%  | 6 | 46% | 77% | 67% | Re-present | 51% | 50% | 61% | 45% | 6 |  |



1  
2  
3  
4  
5  
6  
7  
8  
9  
10  
11  
12  
13  
14  
15  
16  
17  
18  
19  
20  
21  
22  
23  
24  
25  
26  
27  
28  
29  
30  
31  
32  
33  
34  
35  
36  
37  
38  
39  
40  
41  
42  
43  
44  
45  
46  
47

|                                                                             |     |     |   |     |     |     |            |     |     |     |     |   |
|-----------------------------------------------------------------------------|-----|-----|---|-----|-----|-----|------------|-----|-----|-----|-----|---|
| Medication Adherence                                                        | 62% | 4%  | 6 | 50% | 82% | 52% | Re-present | 45% | 47% | 44% | 40% | 5 |
| Loneliness                                                                  | 62% | 10% | 6 | 42% | 68% | 81% | Re-present | 41% | 37% | 56% | 30% | 5 |
| Information about the discharge reported to other relevant service          | 62% | 9%  | 6 | 50% | 73% | 71% | Re-present | 48% | 37% | 78% | 40% | 5 |
| service user experience of coercion at discharge                            | 61% | 6%  | 6 | 46% | 77% | 63% | Re-present | 43% | 40% | 67% | 35% | 5 |
| Clinical readiness for discharge                                            | 60% | 6%  | 6 | 48% | 67% | 67% | Re-present | 36% | 30% | 39% | 40% | 5 |
| Medication side Effects                                                     | 59% | 7%  | 6 | 38% | 77% | 67% | Re-present | 41% | 30% | 61% | 35% | 5 |
| Emergency department visit post discharge                                   | 59% | 6%  | 6 | 58% | 68% | 52% | Re-present | 62% | 63% | 67% | 60% | 6 |
| Quality of interpersonal relationship (friend and family)                   | 59% | 7%  | 6 | 50% | 77% | 52% | Re-present | 46% | 40% | 72% | 35% | 5 |
| Iatrogenic harm (patient safety incident or harm caused by the care system) | 59% | 4%  | 6 | 40% | 64% | 71% | Re-present | 51% | 37% | 72% | 50% | 6 |
| Completion of planned care                                                  | 59% | 7%  | 6 | 50% | 76% | 52% | Re-present | 39% | 40% | 56% | 30% | 5 |
| Concern/anxiety about discharge                                             | 58% | 9%  | 6 | 31% | 73% | 76% | Re-present | 26% | 17% | 33% | 35% | 4 |
| Autonomy (e.g. independence, autonomous decision making)                    | 57% | 3%  | 6 | 35% | 73% | 70% | Re-present | 36% | 27% | 50% | 30% | 5 |
| staff understanding of safe and effective discharge                         | 57% | 10% | 6 | 40% | 68% | 67% | Re-present | 41% | 30% | 67% | 35% | 4 |
| self injury (i.e. harm to self)                                             | 57% | 6%  | 6 | 50% | 64% | 52% | Re-present | 49% | 53% | 61% | 35% | 5 |
| Financial support (e.g. benefit advice, debt advice)                        | 57% | 9%  | 6 | 38% | 82% | 57% | Re-present | 46% | 40% | 72% | 30% | 5 |
| stable relationship with health professional                                | 55% | 4%  | 6 | 38% | 71% | 58% | Re-present | 33% | 37% | 50% | 20% | 5 |
| Medication Management                                                       | 54% | 3%  | 6 | 42% | 71% | 52% | Re-present | 42% | 37% | 61% | 40% | 5 |
| Carer/family/other satisfaction with discharge                              | 54% | 9%  | 6 | 35% | 68% | 57% | Re-present | 36% | 27% | 61% | 35% | 4 |
| Clinical Recovery                                                           | 53% | 7%  | 6 | 60% | 55% | 43% | Re-present | 36% | 33% | 50% | 30% | 5 |
| service use                                                                 | 52% | 4%  | 6 | 46% | 50% | 63% | Re-present | 30% | 33% | 39% | 15% | 4 |
| Violence                                                                    | 52% | 9%  | 6 | 46% | 60% | 48% | Re-present | 29% | 33% | 33% | 15% | 4 |
| Victim of crime                                                             | 52% | 12% | 6 | 38% | 68% | 48% | Re-present | 28% | 30% | 44% | 10% | 4 |
| Experience of stigma                                                        | 52% | 7%  | 6 | 42% | 59% | 57% | Re-present | 30% | 20% | 50% | 25% | 4 |

|                                                                                |                                 |     |     |     |     |     |                |         |     |     |        |     |   |
|--------------------------------------------------------------------------------|---------------------------------|-----|-----|-----|-----|-----|----------------|---------|-----|-----|--------|-----|---|
| Engagement with psychological intervention                                     | 51%                             | 4%  | 6   | 35% | 45% | 76% | Re-present     | 33%     | 30% | 67% | 5%     | 4   |   |
| Cancellation or change to follow up meeting                                    | 51%                             | 12% | 6   | 19% | 82% | 57% | Re-present     | 42%     | 23% | 67% | 40%    | 5   |   |
| serious incident (i.e. serious incident reported formally)                     | 50%                             | 6%  | 5.5 | 44% | 45% | 62% | Exclude        |         |     |     |        |     |   |
| Employment                                                                     | 50%                             | 7%  | 5.5 | 58% | 48% | 38% | Exclude        |         |     |     |        |     |   |
| Medication Knowledge                                                           | 49%                             | 9%  | 5   | 35% | 64% | 52% | Exclude        |         |     |     |        |     |   |
| Engagement with community service                                              | 49%                             | 4%  | 5   | 35% | 50% | 71% | Exclude        |         |     |     |        |     |   |
| Length of stay pre-discharge                                                   | 46%                             | 10% | 5   | 38% | 55% | 48% | Exclude        |         |     |     |        |     |   |
| Family/carer/other readiness for discharge                                     | 46%                             | 9%  | 5   | 42% | 55% | 43% | Exclude        |         |     |     |        |     |   |
| Leaving the hospital against medical advice                                    | 45%                             | 14% | 5   | 46% | 55% | 33% | Exclude        |         |     |     |        |     |   |
| Outpatient appointment/visit adherence                                         | 44%                             | 4%  | 5   | 54% | 57% | 24% | Exclude        |         |     |     |        |     |   |
| Aggression                                                                     | 44%                             | 10% | 5   | 42% | 43% | 48% | Exclude        |         |     |     |        |     |   |
| Delay in expected discharge                                                    | 43%                             | 13% | 5   | 12% | 67% | 57% | Exclude        |         |     |     |        |     |   |
| substance Misuse (incl. alcohol)                                               | 41%                             | 9%  | 5   | 28% | 50% | 48% | Exclude        |         |     |     |        |     |   |
| serious accidental injury                                                      | 40%                             | 12% | 5   | 25% | 36% | 62% | Exclude        |         |     |     |        |     |   |
| Community participation                                                        | 39%                             | 6%  | 5   | 35% | 36% | 48% | Exclude        |         |     |     |        |     |   |
| stability                                                                      | 38%                             | 4%  | 5   | 13% | 59% | 47% | Exclude        |         |     |     |        |     |   |
| Advocate involvement in discharge planning                                     | 37%                             | 12% | 5   | 24% | 45% | 45% | Exclude        |         |     |     |        |     |   |
| Professional/care team satisfaction with information provision at discharge    | 36%                             | 13% | 5   | 19% | 45% | 48% | Exclude        |         |     |     |        |     |   |
| Primary Care/Community service/Nongovernmental or Charity service satisfaction | 35%                             | 16% | 5   | 15% | 50% | 48% | Exclude        |         |     |     |        |     |   |
| Police intervention post discharge                                             | 34%                             | 16% | 5   | 35% | 32% | 35% | Exclude        |         |     |     |        |     |   |
| staff satisfaction with discharge                                              | 28%                             | 16% | 5   | 19% | 36% | 29% | Exclude        |         |     |     |        |     |   |
| Boredom                                                                        | 26%                             | 25% | 4   | 12% | 36% | 33% | Exclude        |         |     |     |        |     |   |
| Meaningful Activity (i.e. employment, studying, volunteering)                  | New outcome proposed in round 1 |     |     |     |     |     |                | Include | 77% | 73% | 83.33% | 80% | 6 |
| Resilience                                                                     | New outcome proposed in round 1 |     |     |     |     |     | Do not present |         |     |     |        |     |   |
| Dual harm (i.e. a person harms themselves and others)                          | New outcome proposed in round 1 |     |     |     |     |     |                | Exclude | 32% | 23% | 55.56% | 30% | 4 |

1  
2  
3  
4  
5  
6  
7  
8  
9  
10  
11  
12  
13  
14  
15  
16  
17  
18  
19  
20  
21  
22  
23  
24  
25  
26  
27  
28  
29  
30  
31  
32  
33  
34  
35  
36  
37  
38  
39  
40  
41  
42  
43  
44  
45  
46  
47

|                                                              |                                 |                |  |  |  |  |  |  |  |
|--------------------------------------------------------------|---------------------------------|----------------|--|--|--|--|--|--|--|
| Annual admissions                                            | New outcome proposed in round 1 | Do not present |  |  |  |  |  |  |  |
| Harm to others (violence, criminal or risk-taking behaviour) | New outcome proposed in round 1 | Do not present |  |  |  |  |  |  |  |
| Levels of patient confidentiality                            | New outcome proposed in round 1 | Do not present |  |  |  |  |  |  |  |
| Personal learning                                            | New outcome proposed in round 1 | Do not present |  |  |  |  |  |  |  |

For peer review only

**File 5: Outcome Measure Recommendation Results****Outcome 1: Readmission**

| Measure                                                                    | Number of votes | Important comments                                                                                                                                                                         |
|----------------------------------------------------------------------------|-----------------|--------------------------------------------------------------------------------------------------------------------------------------------------------------------------------------------|
| Interviews with SUs                                                        | 12              | <ul style="list-style-type: none"> <li>In some countries... there is no easily accessible data on readmission rates... in our experience self-reported in the most reliable way</li> </ul> |
| Retrospective review of administrative data                                | 13              | <ul style="list-style-type: none"> <li>Might not show people who need admission but don't because there's no bed</li> </ul>                                                                |
| Extracted from case-managers notes and cross-checked with hospital records | 10              | <ul style="list-style-type: none"> <li>Might be easier to gather administrative data, but worth cross-checking to improve quality of information</li> </ul>                                |
| Self-reported questionnaire                                                | 1               |                                                                                                                                                                                            |
| Other- carer interview                                                     | 2               |                                                                                                                                                                                            |
| Total                                                                      | 38              |                                                                                                                                                                                            |

**Conclusion:** A minimum recommendation of using retrospective review of administrative data. This will allow for various studies with diverse time and financial limits to use the COS. However, we also advise that this should be supplemented either by cross-checking with service-users, case managers or carers, where possible to improve quality of data.

**Time Markers**

| Time marker          | Number of Votes |
|----------------------|-----------------|
| Within 2 days        | 3               |
| Within 3 days        | 2               |
| Within 7 days        | 17              |
| Within 28 days       | 12              |
| Within 30 days       | 7               |
| Within 1 month       | 7               |
| Within 6 weeks       | 4               |
| Within 12 weeks      | 7               |
| Within 3 months      | 11              |
| Within 6 months      | 14              |
| Other (1yr and 3yrs) | 1               |
|                      |                 |
| Around 3 days        | 5               |
| Around a month       | 26              |
| Around 3 months      | 18              |

**Conclusion:** The minimum recommendation to record readmission within 28 days. 26 of the 43 participants recommended a measure of around a month (1 month, 30 days or 28 days) with 28 being this most popular. Those looking for higher quality or more comprehensive data may also like to record 7 days, 3 months and 6 months as these were also popular recommendations.

**Outcome 2: Quality of Life**

| Instrument                                          | Number of votes | Comments                                                                                                                                                                                                                                   |
|-----------------------------------------------------|-----------------|--------------------------------------------------------------------------------------------------------------------------------------------------------------------------------------------------------------------------------------------|
| ReQoL- 10                                           | 9               | 'I think ReQoL would be best for patients in MH services as I understand it was validated for CMHT patients but if someone didn't have contact with MH services before and isn't under a CMHT afterwards another measure might be better.' |
| ReQoL- 20                                           | 3               |                                                                                                                                                                                                                                            |
| Quality of Life Brief Version (Lehman)              | 2               |                                                                                                                                                                                                                                            |
| WHO Quality of Life Scale                           | 5               |                                                                                                                                                                                                                                            |
| Manchester Short Assessment Quality of Life (MANSA) | 1               |                                                                                                                                                                                                                                            |

|                                         |    |                                                                                                |
|-----------------------------------------|----|------------------------------------------------------------------------------------------------|
| Satisfaction with Life Scale (SWLS)     | 1  |                                                                                                |
| SF12                                    | 2  |                                                                                                |
| EQ5D                                    | 0  |                                                                                                |
| AQoL-8D                                 | 0  |                                                                                                |
| Other (ICECAP)                          | 1  |                                                                                                |
| Develop a new tool                      | 2  |                                                                                                |
| No instrument (interviews etc. instead) | 7  | I think the use of tools should be complemented with interviews with service users and carers. |
| Total                                   | 33 |                                                                                                |
| ReQoL combined (10+20)                  | 12 |                                                                                                |

**Conclusion:** We recommend that researchers use ReQoL-10. This was the most voted for instrument. If we also combine the scores with those who voted for ReQoL 20, a large proportion of the group suggested this outcome. As this is a quality of life measure specific to mental health recovery we feel this is most appropriate.

#### Time markers

| Time Point                                     | Number of votes |
|------------------------------------------------|-----------------|
| Within 2 days                                  | 3               |
| Within 3 days                                  | 2               |
| Within 7 days                                  | 16              |
| Within 28 days                                 | 11              |
| Within 30 days                                 | 6               |
| Within 1 month                                 | 9               |
| Within 6 weeks                                 | 3               |
| Within 12 weeks                                | 5               |
| Within 3 months                                | 21              |
| Within 6 months                                | 11              |
| Other (within 9 months, 12 months and 3 years) | 2               |
| Pre-discharge                                  | 9               |
| Around 3 days                                  | 5               |
| Around 1 month                                 | 26              |
| Around 3 months                                | 26              |

**Conclusion:** We recommend a minimum measure of QoL at one month post-discharge in RCTs. This is in keeping with the readmission time frames, making a more comprehensive and accessible core outcome set. Those using within-participant measures of quality of life may like to also measure a pre-discharge baseline. Those looking for more thorough assessment of QoL may like to also measure at 7 days post-discharge and 3 months, as these were also highly recommended time markers.

#### Core Outcome 3: Suicide completed

| Measure                                                              | Number of votes |
|----------------------------------------------------------------------|-----------------|
| Retrospective review of administrative data                          | 18              |
| Extracted from case managers and cross-checked with hospital records | 17              |
| Extracted from clinical case notes                                   | 14              |
| Other                                                                |                 |
| Extracted from serious incident reporting                            |                 |
| From family and friends                                              | 4               |
| Total                                                                | 53              |

**Conclusion:** Retrospective review of administrative data. To keep in line with other outcomes and was marginally highest measure.

| Time Marker    | Number of votes |
|----------------|-----------------|
| Within 2 days  | 2               |
| Within 3 days  | 2               |
| Within 7 days  | 20              |
| Within 28 days | 12              |

|                 |    |
|-----------------|----|
| Within 30 days  | 4  |
| Within 1 month  | 9  |
| Within 6 weeks  | 0  |
| Within 12 weeks | 4  |
| Within 3 months | 14 |
| Within 6 months | 13 |
| Other           | 2  |
|                 |    |
| Around 3 days   | 4  |
| Around 1 month  | 25 |
| Around 3 months | 18 |

**Conclusion.** Within 28 days for consistency with other outcomes. Other researchers may want to use 7 days and 3 months as these were highly recommended also.

#### Outcome 4: Psychological Distress

| Instrument                                                    | Number of votes |
|---------------------------------------------------------------|-----------------|
| Kessler Psychological Distress (K10)                          | 6               |
| CORE-10                                                       | 5               |
| Brief Psychiatric Rating Scale (BPRS)                         | 3               |
| Brief Symptom Inventory (BSI)                                 | 1               |
| The positive and negative symptom scale                       | 1               |
| The Discharge List (DL) – 20 item scale                       | 2               |
| Clinical Global Impression to Assess illness severity         | 0               |
| ASI (Psychiatric problem subscale)                            | 0               |
| PSYRAT (Psychological Distress subscale)                      | 1               |
| Develop a new self-assessment tool for psychological distress | 5               |
| Other                                                         | 1               |
| No instrument (interview or other method instead)             | 6               |
| Total                                                         | 31              |

**Conclusion:** We recommend Kessler Psychological Distress (K10). Although there were very few votes for measures. The same amount of people who voted for K10 also voted for interviews or other measures and a similar amount recommended the development of a new measure, CORE-10 was similarly close. Whilst we make this recommendation, we also suggest that future researchers may look to develop something specific for this core outcome set. Interviews would not allow for easy comparison of scores so would not be relevant for a core outcome set.

#### Time Markers

| Time Marker                           | Number of votes |
|---------------------------------------|-----------------|
| Within 2 days                         | 2               |
| Within 3 days                         | 4               |
| Within 7 days                         | 22              |
| Within 28 days                        | 8               |
| Within 30 days                        | 4               |
| Within 1 month                        | 14              |
| Within 6 weeks                        | 3               |
| Within 12 weeks                       | 4               |
| Within 3 months                       | 15              |
| Within 6 months                       | 14              |
| Other                                 | 3               |
| Pre-discharge baseline measure at ... | 5               |
|                                       |                 |
| Around 3 days                         | 6               |
| Around 1 month                        | 26              |
| Around 3 months                       | 19              |

**Conclusion:** The minimum recommendation is one month post-discharge. For consistency with other outcomes we recommend measure at one month. 7 days and 3 months are also highly recommended, so we would recommend these for more thorough research.

**File 6: Proposed potential service user discharge experience PROM that includes items of most importance to stakeholders in addition to the core outcome set**

| Item                                                                 | Strongly Agree | Agree | Neither Agree nor Disagree | Disagree | Strongly Disagree |
|----------------------------------------------------------------------|----------------|-------|----------------------------|----------|-------------------|
| 1. I felt involved in my discharge planning                          |                |       |                            |          |                   |
| 2. I understood my discharge plan                                    |                |       |                            |          |                   |
| 3. I know how to access support in the community                     |                |       |                            |          |                   |
| 4. I was frequently involved in decisions about my care at discharge |                |       |                            |          |                   |
| 5. I was discharged to appropriate accommodation                     |                |       |                            |          |                   |
| 6. I was satisfied with the information provided to me at discharge  |                |       |                            |          |                   |

1  
2  
3  
4  
5  
6  
7  
8  
9  
10  
11  
12  
13  
14  
15  
16  
17  
18  
19  
20  
21  
22  
23  
24  
25  
26  
27  
28  
29  
30  
31  
32  
33  
34  
35  
36  
37  
38  
39  
40  
41  
42  
43  
44  
45  
46  
47  
48  
49  
50  
51  
52  
53  
54  
55  
56  
57  
58  
59  
60

For peer review only



1  
2  
3  
4  
5  
6  
7  
8  
9  
10  
11  
12  
13  
14  
15  
16  
17  
18  
19  
20  
21  
22  
23  
24  
25  
26  
27  
28  
29  
30  
31  
32  
33  
34  
35  
36  
37  
38  
39  
40  
41  
42  
43  
44  
45  
46  
47  
48  
49  
50  
51  
52  
53  
54  
55  
56  
57  
58  
59  
60

For peer review only

# BMJ Open

## Developing a Core Outcome Set for Interventions to Improve Discharge from Acute Mental Health Inpatient Services: A Survey, Delphi and Consensus Meeting with Key Stakeholder Groups.

|                                 |                                                                                                                                                                                                                                                         |
|---------------------------------|---------------------------------------------------------------------------------------------------------------------------------------------------------------------------------------------------------------------------------------------------------|
| Journal:                        | <i>BMJ Open</i>                                                                                                                                                                                                                                         |
| Manuscript ID                   | bmjopen-2019-034215.R1                                                                                                                                                                                                                                  |
| Article Type:                   | Original research                                                                                                                                                                                                                                       |
| Date Submitted by the Author:   | 06-Jan-2020                                                                                                                                                                                                                                             |
| Complete List of Authors:       | Tyler, Natasha; The University of Manchester, NIHR Greater Manchester Patient Safety Translational Research Centre<br>Wright, Nicola; University of Nottingham<br>Grundy, Andrew; University of Nottingham<br>Waring, Justin ; University of Birmingham |
| <b>Primary Subject Heading</b>: | Mental health                                                                                                                                                                                                                                           |
| Secondary Subject Heading:      | Health services research                                                                                                                                                                                                                                |
| Keywords:                       | MENTAL HEALTH, Core Outcome Set, Discharge, Care Transitions, Acute Adult Mental Health Services                                                                                                                                                        |
|                                 |                                                                                                                                                                                                                                                         |

SCHOLARONE™  
Manuscripts



I, the Submitting Author has the right to grant and does grant on behalf of all authors of the Work (as defined in the below author licence), an exclusive licence and/or a non-exclusive licence for contributions from authors who are: i) UK Crown employees; ii) where BMJ has agreed a CC-BY licence shall apply, and/or iii) in accordance with the terms applicable for US Federal Government officers or employees acting as part of their official duties; on a worldwide, perpetual, irrevocable, royalty-free basis to BMJ Publishing Group Ltd ("BMJ") its licensees and where the relevant Journal is co-owned by BMJ to the co-owners of the Journal, to publish the Work in this journal and any other BMJ products and to exploit all rights, as set out in our [licence](#).

The Submitting Author accepts and understands that any supply made under these terms is made by BMJ to the Submitting Author unless you are acting as an employee on behalf of your employer or a postgraduate student of an affiliated institution which is paying any applicable article publishing charge ("APC") for Open Access articles. Where the Submitting Author wishes to make the Work available on an Open Access basis (and intends to pay the relevant APC), the terms of reuse of such Open Access shall be governed by a Creative Commons licence – details of these licences and which [Creative Commons](#) licence will apply to this Work are set out in our licence referred to above.

Other than as permitted in any relevant BMJ Author's Self Archiving Policies, I confirm this Work has not been accepted for publication elsewhere, is not being considered for publication elsewhere and does not duplicate material already published. I confirm all authors consent to publication of this Work and authorise the granting of this licence.

1  
2  
3 Title: Developing a Core Outcome Set for Interventions to Improve Discharge from Acute  
4 Mental Health Inpatient Services: A Survey, Delphi and Consensus Meeting with Key  
5 Stakeholder Groups.  
6  
7  
8

9  
10 Authors:

11 Corresponding Author: Natasha Tyler (Greater Manchester Patient Safety Translational  
12 Research Centre, University of Manchester, Manchester, UK,  
13 [Natasha.tyler@manchester.ac.uk](mailto:Natasha.tyler@manchester.ac.uk), 0161 275 7620)  
14

15  
16 Nicola Wright (University of Nottingham, Nottingham, UK)  
17

18 Andrew Grundy (University of Nottingham, Nottingham, UK)  
19

20 Justin Waring (Health Services Management Centre, University of Birmingham,  
21 Birmingham, UK)  
22  
23  
24  
25  
26  
27  
28  
29  
30  
31  
32  
33  
34  
35  
36  
37  
38  
39  
40  
41  
42  
43  
44  
45  
46  
47  
48  
49  
50  
51  
52  
53  
54  
55  
56  
57  
58  
59  
60

## Abstract

### Objective

To develop a core set of outcomes to be used in all future studies into discharge from acute mental health services to increase homogeneity of outcome reporting.

### Design

We used a cross-sectional online survey with qualitative responses to derive a comprehensive list of outcomes, followed by two online Delphi rounds and a face-to-face consensus meeting.

### Setting

The setting the core outcome set applies to is acute adult mental health.

### Participants

Participants were recruited from five stakeholder groups: service-users, families and carers, researchers, healthcare professionals and policy makers.

### Interventions

The core outcome set is intended for all interventions that aim to improve discharge from acute mental health services to the community.

### Results

Ninety-three participants in total completed the questionnaire, 69 in Delphi round 1, and 68 in round 2, with relatively even representation of groups. Eleven participants attended the consensus meeting. Service-users, healthcare professionals, researchers, carers/families and end-users of research agreed on a four-item core outcome set: Readmission, Suicide completed, Service-user reported psychological distress and Quality of life.

### Conclusion

Implementation of the core outcome set in future trials research will provide a framework to achieve standardisation, facilitate selection of outcome measures, allow between-study comparisons, and ultimately enhance the relevance of trial or research findings to healthcare professionals, researchers, policy makers and service users.

## Article Summary

### Strengths and Limitations

- This is the first initiative to reduce heterogeneity in outcome reporting for interventions that improve discharge from acute mental health services.
- We achieved a high level of consensus amongst 69 service users, families/carers, healthcare professionals, researchers and policy makers.
- Although the stakeholder group included international researchers, service users and healthcare professionals were from the UK

## Funding

This work was funded by the National Institute for Health Research (NIHR) Greater Manchester Patient Safety Translational Research Centre (NIHR Greater Manchester PSTRC). The views expressed are those of the author(s) and not necessarily those of the NIHR or the Department of Health and Social Care.

## Competing Interests

The authors report no competing interests.

## Key Words

- Acute Adult Mental Health Services
- Core Outcome Set
- Mental Health
- Discharge
- Care Transitions

## Background

Care transitions (when patient care is transferred from one team, department or organisation to another) are widely recognised as a vulnerable and high-risk stage in the care pathway [1–3]. Safety issues may be intensified in acute mental health services, where care transitions are described as chaotic [3]. For example, suicide risk increases post-discharge from acute mental health services [4,5]. A growing body of research describes these risks either directly in terms of identified ‘safety’ events or indirectly in terms of broader ‘problems’, including for example treatment non-adherence, inappropriate readmissions, increased risk of self-injury or suicide attempts [3,6–8].

Internationally, researchers have attempted to find solutions to the problems or threats to safety associated with discharge from acute mental health services by developing interventions that aim to improve different aspects of discharge planning, transitions, continuity of care, and follow-up care. There are various types of discharge intervention presented in the literature [9]. Some interventions aim to improve discharge by introducing new roles, for example a discharge co-ordinator, that co-ordinates care and provides and single point of contact to help navigate the complex system [10]. Others focus on increasing contact between clinical staff and service users, for example using letters, videoconferencing or telephone follow-up [11–13]. Many ‘successful’ interventions in reducing readmission, bridged the boundaries between ward and community by providing types of ward-based care in the community [14,15] or where community teams lead discharge planning on the wards [16], with a focus on the early development of therapeutic relationships. Other successful interventions aim to solve a particular problem for a smaller group of acute service users, for example those at risk of homelessness, by providing financial and social support [17,18].

1  
2  
3 There has been little attempt to compare these diverse interventions. Existing reviews have  
4 included either a narrow range of studies addressing a single outcome or focus on a specific  
5 time frame in an attempt to synthesise results [8,19]. Comparison and meta-synthesis of  
6 effectiveness of interventions has reported limited success. Across the papers included in our  
7 systematic review and those by other researchers [1,20], variation in the outcomes reported is  
8 substantial. This limits between study comparability and delays advancement in evidence  
9 collection. Furthermore, outcomes in these trials were not necessarily representative of the  
10 measures that service users would consider important at discharge. Both matters can  
11 potentially be addressed with the development of a 'core outcome set', defined as "an agreed,  
12 standardised collection of outcomes which should be measured and reported, as a minimum,  
13 in all trials for a specific clinical area" [21].  
14  
15

16  
17 The development and use of 'core outcome sets' has been endorsed as a means to reduce  
18 outcome heterogeneity in research, and to increase the relevance of research through the  
19 involvement of key stakeholders in its development [22]. There is an emerging body of  
20 literature highlighting the difficulties of defining and assessing outcomes in a mental health  
21 population [23]. There is also evidence of a lack of agreement amongst key groups about  
22 what should be measured and in what capacity and an evident tension between the population  
23 health perspective and provision of individualised care [19,23]. One aforementioned  
24 previous review identified the need for consensus on outcome definitions in discharge  
25 planning interventions [19], similarly a recent Kings Fund report suggested broader  
26 consensus upon the outcomes that matter is imperative for advancement [23]. Therefore,  
27 generating agreement amongst healthcare professionals, service users, policy makers and  
28 researchers is a difficult but imperative task, to enable the useful direction of healthcare  
29 services [23]. The difficulties are further exemplified when applied to care transitions, a  
30 multi-agency, multi-stage, complex period of the care pathway [3,24]. This paper outlines  
31 the development of a core outcome set for research of interventions to improve discharge  
32 from acute mental health wards to the community.  
33  
34  
35  
36

## 37 **Methods**

### 38 **Study overview**

39  
40 The scope of the core outcome set was defined according to the criteria recommended by  
41 Core Outcome Measures in Effectiveness Trials (COMET) [25]. The health condition was  
42 functional conditions (mental disorders other than dementia, and includes severe mental  
43 illness such as schizophrenia). The population was adults aged 18-65, the intervention was  
44 any interventions that aimed to improve discharge from an acute mental health setting to the  
45 community. The core outcome set was developed using four stages, including service users  
46 and healthcare professionals at each stage: (1) a long list of outcomes was generated through  
47 a systematic review [1] and qualitative survey; (2) the resulting long outcome list was used to  
48 populate an online Delphi process (2 rounds); and (3) the results of the Delphi survey were  
49 appraised at a consensus meeting and the final core outcome set was established. After the  
50 development of the core outcome set a final stage (4), engaged stakeholders to make  
51 recommendations for the measurement of the core outcomes. The process included a series of  
52 core research team meetings at every stage, the team comprised of a researcher and core  
53 outcome set developer, an associate professor in mental health and mental health nurse, a  
54 researcher and expert by lived experience of acute services and an expert in patient safety.  
55 Participants did not fit into distinct homogeneous groups, for example mental health  
56 professionals were sometimes also past service users or family members of service users.  
57  
58  
59  
60

1  
2  
3 Similarly researchers had personal experience of inpatient mental health services. Therefore,  
4 wherever possible we considered the group as whole and tried not to compare categories.  
5

## 6 **Participants**

7  
8  
9 Participants were recruited in a number of ways in December 2018 to January 2019.  
10 Academic researchers were recruited if their research had been included in our systematic  
11 review or if they were known researchers in the field identified by the team. End-users of  
12 research (policy makers, NGOs, NHS management, commissioners, advocates etc.) were  
13 recruited via searching for publicly available contact details or using our team's professional  
14 networks or social media. Service users and healthcare professionals were recruited through  
15 social media. Twitter was nominated as the primary platform for recruitment due to its ability  
16 to reach into the specific communities of interest we required: mental health professionals,  
17 service users and families/carers. Using social media has been reported as a cost-effective and  
18 efficient way to recruit those from potentially stigmatised groups [26]. Further, the peer  
19 network structures of social media platforms enable users to recruit other users through  
20 sharing links within their networks.  
21  
22

23  
24 The same participant group was used throughout the iterative research process, therefore, in  
25 order to reduce attrition, those who dropped out in early rounds were invited to re-join the  
26 panel in subsequent rounds. Participants were recruited for the consensus meeting during the  
27 Delphi, UK participants were asked to indicate whether they would be interested in a face-to-  
28 face meeting. We invited a random sample of interested participants to attend, that ensured  
29 representative of the stakeholder groups. If a participant declined the invite a similarly  
30 matched participant was invited from the Delphi panel principally, or the teams wider  
31 network.  
32  
33

## 34 **Stage 1: Gathering information**

35  
36 In addition to the outcomes extracted from the systematic review [1], outcomes of importance  
37 to each stakeholder group were identified through qualitative surveys. For the main body of  
38 the questionnaire, we used open questions that were developed to elicit potential additional  
39 outcomes. The questions were loosely modelled on questions developed for a large scale  
40 outcome generation study for a depression core outcome set which were developed with  
41 service users and healthcare professionals [27]. The question format was mirrored, but  
42 adapted for a mental health discharge theme. The views of a PPI (patient and public  
43 involvement), group sought to confirm appropriateness of questions and instructions (n=5).  
44  
45  
46

47  
48 After reading a participant information sheet and giving informed consent (by ticking a box),  
49 participants selected their stakeholder group (s) and watched a video that describes core  
50 outcome sets to non-experts. All participants were then presented with four open-ended  
51 questions relating to safe and effective discharge (see additional file 1). Participants were  
52 later presented with 3-5 questions specifically developed for their stakeholder group,  
53 additional file 1 outlines all of the questions. If a participant were a member of more than one  
54 group, they answered questions relevant to multiple groups. Participants also answered a  
55 number of demographic questions: years of experience, country of residence, area of UK (if  
56 applicable), gender, age and email address for follow-up. The round was open for 6 weeks  
57 beginning December 10<sup>th</sup> 2018.  
58  
59  
60



1  
2  
3  
4 Qualitative data was coded to identify outcomes and thematically synthesised [28]. This  
5 involved line-by-line coding of text and development of descriptive themes, the final stage  
6 involved generating analytical themes, which were converted into potential outcomes where  
7 applicable. Outcomes two were identified both indirectly, by extrapolating from service  
8 users' experiences (e.g. What would make discharge from an acute mental health ward safe in  
9 your opinion?), and directly, by asking specifically about outcomes (e.g. Can you think of  
10 any important outcomes to measure in research assessing discharge interventions?).  
11  
12

13  
14 Outcomes from the systematic review [1] and qualitative surveys were combined to generate  
15 a long list of outcomes. This list, along with relevant quotes from the qualitative data, was  
16 discussed by the core research team in a structured meeting. Each outcome was considered in  
17 turn and each member had the opportunity to present arguments for or against inclusion. For  
18 each outcome, the group decided whether it should be a stand-alone outcome, combined with  
19 other codes of a similar thematic nature or removed from the process due to being of limited  
20 importance for a core outcome set. For example, we agreed to merge closely related items  
21 (e.g. *family relations* and *quality of interpersonal relationships*) and to exclude outcomes  
22 considered to be of limited importance (e.g., specific to a specialised area of care: *Autistic*  
23 *life*; or intervention *Antipsychotic Politherapy*). Unless there was a unanimous decision to  
24 merge or remove an outcome, it remained as a stand-alone outcome. The group decisions  
25 about each outcome are documented in additional file 2.  
26  
27  
28  
29

## 30 **Stage 2: Delphi survey**

31  
32 The Delphi technique is a research method aimed at generating consensus. It solicits opinions  
33 from stakeholders groups in an iterative process of answering questions. After each round the  
34 responses are summarised and redistributed for discussion in the next round. We chose to  
35 have two rounds of Delphi in this study. The final outcome list that was decided upon after  
36 the group discussion in stage 1 was used to develop the first Delphi questionnaire. Any  
37 outcomes without consensus after the first round, were re-presented in round 2. The outcome  
38 list and instructions for the questionnaires were reviewed for face validity, understanding, and  
39 acceptability by a PPI group (n=5) and modified according to feedback.  
40  
41

42 A link to the survey was sent via email. Each round remained open for 14 days and  
43 participants received two follow-up reminder emails. Round 1 was open from late February  
44 2019 to early March 2019, round 2 was late March 2019 to early April 2019. We ran the  
45 Delphi survey manually using Qualtrics: a secure online hosting platform [29]. In each  
46 round, participants were asked whether the items should become part of a core outcome set.  
47 A 7-point Likert scale was used, described as: Strongly Agree (1), Agree (2), Slightly Agree  
48 (3), Neither Agree nor disagree (4), Slightly Disagree (5), Disagree (6), Strongly Disagree  
49 (7). There is no definitive research indicating the optimal number of points to have on a  
50 Likert scale but scales between 5 and 9 points have been suggested as having the best  
51 reliability, so we chose a 7 point scale [30]. There was a free-text comments box and  
52 participants were encouraged to provide comments that would be fed-back anonymously to  
53 the group. Participants could suggest additional outcomes at the end of round 1, which were  
54 reviewed by the core research team. Any outcome not already represented was added to  
55 round 2.  
56  
57  
58  
59  
60

1  
2  
3 In round 2 median group scores for each outcome and anonymous comments for and against  
4 from the previous round were presented and participants were asked to reflect on the  
5 information presented and score each outcome again. The percentage of participant  
6 agreement with each outcome on a scale of 1–7 was calculated from the scores obtained  
7 during round 1 and again in round 2.  
8  
9

10 Literature suggests that consensus levels should be set a priori at a minimum of 70 percent  
11 [25,31]. We unanimously chose a 75% consensus level, slightly higher than the minimum to  
12 increase sensitivity, but to still allow for a varied pool of applicable outcomes given the  
13 tension in the literature around disagreement between service-user, health professional and  
14 policy-makers opinions of mental health outcomes [23]. Consensus criteria were defined a  
15 priori: outcomes scored as Agree or Strongly Agree (6-7) by 75% or more of the group  
16 reached consensus for inclusion and were included in the provisional core outcome set.  
17 Outcomes scored as Disagree or Strongly Disagree (1-2) by 75% or more were defined as  
18 having reached consensus for exclusion and were excluded. Outcomes not fulfilling criteria  
19 for consensus inclusion or exclusion were defined as not having reached consensus and were  
20 re-presented in round 2.  
21  
22  
23

24 As no outcomes met the original criteria for having reached consensus for exclusion after  
25 round 1, it was agreed by the research team to redefine the criteria for having reached  
26 consensus for exclusion if 50% or less of participants scored the item as Strongly Agree or  
27 Agree (6-7). Reducing exclusion criteria after round 1 has been used effectively in past core  
28 outcome set research [30].  
29  
30  
31

### 32 **Stage 3: Consensus meeting**

33  
34 The results of the Delphi survey were presented at a consensus meeting. The main goal of the  
35 consensus meeting was to decide which items will be included in the final core outcome set.  
36 This was chaired by an independent researcher with expertise in consensus methodology, and  
37 who was not a member of the core research team. Participants were sampled to achieve a  
38 balanced representation of service users, health-care professionals, researchers and end-users  
39 of research. We aimed to have a small representative group of between 9 and 12 to enable  
40 meaningful small group discussions, similar to consensus meetings chaired by the facilitator  
41 in other fields [32,33]. International participation was restricted because of budgetary  
42 constraints.  
43  
44  
45

46 The format of the consensus meeting comprised of a) a short overview of the study and b) a  
47 summary of the Delphi results sorted by stakeholder group, beginning with the outcomes that  
48 met consensus [34]. Outcomes identified in round 1 and 2 of the Delphi as having reached  
49 consensus for inclusion were presented first. Participants were asked if there were any  
50 fundamental reasons why these should not be included in the core outcome set. Divergent  
51 views were actively sought and the chair ensured everyone had opportunity to participate in  
52 discussions before voting commenced. Outcomes from the preliminary core outcome set were  
53 discussed in terms of feasibility and voted upon. Voting was conducted anonymously using  
54 cards in an envelope with bivariate response options (include/exclude). Voting and  
55 consensus criteria followed the same format as in the Delphi (75% for inclusion). Results  
56 were presented after the voting of all outcomes had finished. Outcomes deemed to be having  
57 reached consensus for exclusion or with no consensus in the Delphi were reviewed and  
58 participants were asked if there were any fundamental reasons why these should be included  
59  
60

1  
2  
3 in the core outcome set. Individual outcomes were discussed only if proposed as being  
4 important by a meeting participant. Outcomes meeting criteria for consensus were included in  
5 the core outcome set; all other items excluded. The meeting finished with the presentation  
6 and a final review and discussion of the core outcome set.  
7

## 8 9 **Patient and Public Involvement**

10  
11 Five patient representatives worked with researchers to develop the online questionnaires.  
12 Patients were represented alongside professionals and researchers in the consensus panel.  
13 One member of the research team (and co-author) is an expert by lived experience and was  
14 involved in all design and analysis decisions.  
15

## 16 17 **Ethics and registration**

18 Our findings are reported in line with the Core Outcome Set-Standards for Reporting (COS-  
19 STAR) guidance [34]. The study was prospectively registered with the COMET initiative.  
20 The study was approved by the University of Nottingham Business School ethics committee.  
21

## 22 23 **Role of the funding source**

24  
25 The funding source was not involved in study design; in the collection, analysis, and  
26 interpretation of data; in the writing of the report; and in the decision to submit the paper for  
27 publication  
28

## 29 30 31 **Results**

### 32 33 **Stage 1: Information gathering**

34  
35 Our systematic review has been described in detail elsewhere [1]. In summary 69 outcome  
36 categories were identified from 45 studies. Ninety-three participants in total, from 12  
37 countries completed the information gathering questionnaire. However, as aforementioned,  
38 many identified with more than one stakeholder group, therefore we do not have absolute  
39 homogenous stakeholder group numbers, 27 identified as service users, 17 family/carers, 39  
40 health-care professionals, 15 end-user of research and 37 researchers. Additional file 3  
41 presents participants demographics. Qualitative questionnaires revealed an additional 45  
42 outcomes that were not identified in the literature (for example, outcomes concerning  
43 involvement in discharge planning, see additional file 2). After discussion within the research  
44 team, 82 standardised outcome terms were taken forward into the Delphi process; 19  
45 outcomes were combined/collapsed and 13 were removed, see additional file 2.  
46  
47  
48

### 49 50 **Stage 2: Delphi process**

51  
52 Sixty-nine participants completed round 1 of the Delphi (22 service users, families and  
53 carers, 26 researchers and 21 healthcare professionals and decision makers) and 68  
54 participants completed round 2 (30 researchers, 18 service users and families and 20  
55 healthcare professionals and decision makers). Whilst 5 participants dropped out after round  
56 1, 4 participants joined the panel in round 2 (this individuals participated the qualitative  
57 questionnaire but not round 1). There was a 1.4% attrition between round 1 and 2 of the  
58 Delphi. Seven additional outcomes were proposed by participants during round 1, of which  
59  
60

two were added into round 2 after a core team discussion. The full list of Delphi items is available in additional file 4.

After round 1, 14 outcomes met the criteria for consensus inclusion (75% or more agreed/strongly agree with that outcome), these were: Service user involvement in discharge

|                                                                           | Percentage agreement | Percentage Disagreement | Median | Researchers | Service users and families | HCPs and DMs |
|---------------------------------------------------------------------------|----------------------|-------------------------|--------|-------------|----------------------------|--------------|
| Service user involvement in discharge planning (inc. feeling listened to) | 87%                  | 4%                      | 7      | 65%         | 100%                       | 95%          |
| Functioning (health, social, etc.)                                        | 83%                  | 3%                      | 6      | 69%         | 100%                       | 81%          |
| Mental health and illness (symptom/psychological distress)                | 83%                  | 3%                      | 6      | 73%         | 91%                        | 86%          |
| Personal Recovery                                                         | 82%                  | 1%                      | 6      | 75%         | 86%                        | 86%          |
| Service user understanding of discharge plan                              | 81%                  | 3%                      | 6      | 65%         | 91%                        | 86%          |
| Quality of life                                                           | 81%                  | 1%                      | 6.5    | 65%         | 90%                        | 86%          |
| Suicide Completed                                                         | 80%                  | 4%                      | 7      | 80%         | 90%                        | 68%          |
| Readmission                                                               | 80%                  | 6%                      | 6      | 77%         | 77%                        | 86%          |
| Service user involvement in decision making (shared decision making)      | 77%                  | 4%                      | 7      | 50%         | 95%                        | 86%          |

planning; Functioning; Mental health and illness; Personal Recovery; Service user understanding of discharge plan; Quality of life; Suicide Completed; Readmission; Service user involvement in decision making; Service user satisfaction with information provision at discharge; Service user knowledge of how to access community support; Recurrence; Suicide Attempted; Discharge to appropriate accommodation (see table 1). Twenty outcomes met the revised criteria for having reached consensus for exclusion (50% or less of participants agreed/strongly agreed with that outcome). Forty-eight outcomes did not meet consensus criteria for inclusion or exclusion and were re-presented to the group in round 2. Therefore, 50 outcomes were presented in round 2, only one outcome met the criteria for consensus after this round: meaningful activity. No outcomes met criteria for exclusion and 49 did not meet consensus. Additional file 4 shows consensus levels for each outcome in each round.

*Table 1: The Preliminary Core Outcome Set at the end of the online Delphi.*

|                                                                                                                      |     |    |   |     |     |     |
|----------------------------------------------------------------------------------------------------------------------|-----|----|---|-----|-----|-----|
| Service user satisfaction with information provision at discharge (e.g. regarding medication, risk, crisis planning) | 77% | 6% | 6 | 65% | 86% | 81% |
| Service user knowledge of how to access community support (i.e. in an emergency)                                     | 77% | 3% | 6 | 58% | 91% | 86% |
| Recurrence (i.e. relapse)                                                                                            | 75% | 1% | 6 | 58% | 91% | 76% |
| Suicide Attempted                                                                                                    | 75% | 4% | 6 | 62% | 86% | 81% |
| Discharge to appropriate accommodation                                                                               | 75% | 3% | 6 | 69% | 91% | 67% |
| Meaningful Activity (included in Round 2)                                                                            |     |    |   | 73% | 80% | 79% |

### Stage 3: Consensus Meeting

Eleven participants attended the consensus meeting, as in previous rounds these categories were not exclusive, six participants were researchers, three identified as service users, three as healthcare professionals and three end-users of research, see table 3. Table 4 shows the quantitative results of the meeting.

The preliminary 15-item core outcome set was considered individually and discussions indicated that many of the outcomes were elements of an ideal discharge, and process outcomes/variables, but probably not measurable outcomes that should be included in a core outcome set. After these discussions and independent and anonymous voting, five items no longer met consensus criteria for inclusion. First, 'service user involvement' in discharge planning, and the associated items 'Service user understanding of discharge plan', 'Service user involvement in decision making', 'Service user satisfaction with information provision at discharge'; and 'Service user knowledge of how to access community support'. There was a discussion that these are very important elements of a successful discharge, but not core outcomes due to issues surrounding validity and meaning. In the discussion of this paper, we present these five outcomes as a potential self-reported measure of service user satisfaction and involvement, which could be used in addition to the core outcome set.

'Mental health and illness' was initially close to consensus with 73% consensus to include, however those that chose to exclude found it to be too vague, and articulated that they were most interested in measuring acute psychological distress, rather than mental health and illness. The service user representatives in the group interpreted "recovery" to mean a complete amelioration of symptoms and even when in "recovery" individuals described continuing to experience distress and difficulties with their mental health. We chose to therefore separate the broader mental health and illness outcome into self-reported

psychological distress and clinician reported mental health. The granular outcome of self-reported psychological distress resulted in 100% consensus to include. On the contrary clinician reported mental health did not meet consensus criteria (45%). Similar discussions happened around the recurrence (relapse) outcome, whereby its inclusion in a core outcome set, would ultimately necessitate buy-in to criteria model, which suggested that mental health problems could and should be completely resolved.

Discussions around the ‘suicide attempted’ outcome indicated that participants felt that suicide attempts or self-harm had diverse motivations and definitions and they discussed the issues of delineating the boundaries of self-harm and suicide attempts and how this is documented. After the consensus meeting this outcome no-longer meet consensus criteria to include. Discussions surrounding personal recovery, functioning and meaningful activity indicated that participants considered these outcomes too vague and subjective to be a component of a core outcome set. There was consensus to exclude meaningful activity and recovery, and no consensus to include personal recovery. There was consensus to exclude discharge to appropriate accommodation, discussion indicated this was primarily because this spanned the health and social care boundaries and may not be applicable to every intervention.

On completion of the meeting, only four outcomes met consensus criteria for inclusion, see Table 2. A core outcome set of four was agreed, participants agreed that the following should be included: readmission, quality of life, suicide completed and service user reported psychological distress. Readmission was the most frequently used outcome in past research, and despite limitations, participants felt it was one of the only proxy measures of appropriate discharge. Quality of life and psychological distress were considered important ways of quantitatively assessing the psycho-social elements of discharge; which are of primary importance. Suicide completed was considered rare but imperative data to capture given the research highlighting the relationship between acute mental health discharge and suicide highlighted by a growing body of literature [5,35]. Figure 1 shows the process undertaken to reach the core outcome set.

Table 2: The final core outcome set

| Final Core Outcome Set |                                              |
|------------------------|----------------------------------------------|
| 1                      | Readmission                                  |
| 2                      | Quality of Life                              |
| 3                      | Suicide Completed                            |
| 4                      | Service User Reported Psychological Distress |

Table 3: Participants that attended consensus meeting

| PP Number | Researcher | Service User | Healthcare Professional | End-user of Research |
|-----------|------------|--------------|-------------------------|----------------------|
| 1         | X          |              |                         |                      |
| 2         | X          |              |                         |                      |



|       |   |   |   |   |
|-------|---|---|---|---|
| 3     | X |   |   |   |
| 4     | X |   | X |   |
| 5     | X | X |   |   |
| 6     | X |   |   | X |
| 7     |   |   | X |   |
| 8     |   |   | X | X |
| 9     |   | X |   |   |
| 10    |   | X |   |   |
| 11    |   |   |   | X |
| Total | 6 | 3 | 3 | 3 |

Table 4: Outcomes of consensus meeting, levels of consensus in anonymous voting

|                                                                   | Include | Exclude | Percentage |
|-------------------------------------------------------------------|---------|---------|------------|
| Readmission                                                       | 10      | 1       | 91%        |
| Service user reported psychological distress                      | 11      | 0       | 100%       |
| Suicide completed                                                 | 9       | 2       | 82%        |
| QoL                                                               | 9       | 2       | 82%        |
| Reoccurrence                                                      | 4       | 7       | 36%        |
| Mental Health and Illness                                         | 8       | 3       | 73%        |
| Service user involvement in decision making                       | 7       | 4       | 64%        |
| Personal Recovery                                                 | 6       | 5       | 55%        |
| Meaningful Activity                                               | 1       | 10      | 9%         |
| Functioning                                                       | 1       | 10      | 9%         |
| Clinician Reported Mental Health                                  | 5       | 6       | 45%        |
| Service User Satisfaction with information provision at discharge | 3       | 8       | 27%        |
| Service user understanding of the discharge plan                  | 3       | 8       | 27%        |
| Suicide Attempted                                                 | 3       | 8       | 27%        |
| Service User Involvement in Discharge Planning                    | 6       | 5       | 55%        |
| Knowledge of how to access support in a crisis                    | 5       | 6       | 45%        |

|                                        |   |    |    |
|----------------------------------------|---|----|----|
| Discharge to appropriate accommodation | 0 | 11 | 0% |
|----------------------------------------|---|----|----|

<insert figure 1>

## Discussion

This study provides the first international consensus on outcomes for intervention studies concerning discharge from an acute adult mental health inpatient setting. We could not identify any other published core outcome sets for interventions concerning discharge from acute mental health services. Moreover, there are very few core outcome sets for mental health, despite recommendations for consensus in the literature [20,23]. All the included outcomes were agreed upon by more than 75% of a group of relatively equally-represented service-users and family/carers, health-care professionals, researchers and end-user of research using consensus methods. We recommend that all future research studies evaluating interventions for discharge from acute adult mental health settings use this core outcome set as a framework for outcome selection, to compliment, rather than replace any other outcomes that are relevant to their research question. As discharge from acute services is a particularly challenging period for those experiencing mental health problems [3,35], it's important to understand what interventions work and more specifically which elements of an intervention improve which particular outcomes. This core outcome set provides a framework for between-study comparison, ultimately enabling researchers to articulate the theory of change that underpins interventions.

In our systematic review [1], we identified 22 studies that reported readmission rates as an outcome, yet almost all of them captured this in different ways: some used self-report data, some clinical case notes or some retrospective administrative data, others used case manager's reports. In addition the time markers were variable, some used country specific time markers in line with policy such as 28 days in the UK [36], whilst others chose a series of time markers such as within 1 month, 3 month and 6 months, but the time markers were rarely directly comparable. Similarly, six studies measured quality of life but, only two used the same measurement instrument (Lehman's Quality of Life) [16,37]. In the current study, we have developed consensus that Quality of Life and Readmission are important and feasible to measure, but we also make recommendations about how to measure them to improve heterogeneity of outcome reporting.

There were some unexpected exclusions in the core outcome set, for example mental health symptoms and treatment adherence were quite frequently used in past research [1], but not included in the core outcome set. At the beginning of the paper we described the recent Kings Fund report that suggested generating agreement amongst healthcare professionals, service users, policy makers and researchers is a difficult but imperative task [23]. We also found this, and feel that the small four-item core outcome set represents the only outcomes that are unanimously agreed upon, despite so many outcomes being of upmost importance to service-users and families. This research has further highlighted the importance of shared decision making and service-user and family involvement to all stakeholder groups [38]. This consensus study indicates a desire from all groups to monitor levels of service-users satisfaction and involvement in the process. Whilst such outcomes, were excluded in later stages, primarily on the basis of being process variables/outcomes, it does not reduce their



1  
2  
3 prospective importance in discharge interventions or provision of care at discharge. The five  
4 most agreed upon elements of service-user involvement and satisfaction in discharge were:  
5 Service user involvement in discharge planning; Service user understanding of discharge  
6 plan; Service user involvement in decision making; Service user satisfaction with information  
7 provision at discharge; Service user knowledge of how to access community support. We  
8 recommend that future policy makers and healthcare management consider incorporating all  
9 of these elements into local level initiatives as overriding principles of care rather than  
10 interventions/measures, if they are ever missing from current provision. Furthermore, work  
11 highlighting the importance of involving service users in mental health care planning is  
12 beginning to emerge, along with measures of such activity. Therefore, we suggest that future  
13 research wherever possible should include a service user reported outcome measure of  
14 involvement alongside the 4-item core outcome set and any other chosen measures. This  
15 could be measured in an existing instrument of service-user involvement care planning in  
16 mental health, such as the EQUIP PROM (Patient Reported Outcome Measure) [38], or use  
17 the 6 outcomes presented above to develop a self-reported Likert measure of service user  
18 involvement specifically in discharge planning, as these 6 items are developed from synthesis  
19 of academic literature, qualitative questionnaires and met criteria for consensus amongst  
20 experts, so from a psychometric perspective would arguably meet initial face and content  
21 validity criteria [39], see additional file 5.  
22  
23  
24  
25

26 The difficulties of developing a mental health core outcome set was further epitomised when  
27 applied to care transitions: a service-level (rather than specific clinical population) multi-  
28 agency, multi-stage, complex period of the care pathway [3,24]. Generating a set of  
29 meaningful applicable outcomes that span primary and secondary care, across multiple  
30 physical locations, that are relevant for every service user was imperative. For example, a  
31 great deal of past literature focuses on housing interventions [40–42], and whilst housing is a  
32 significant safety issue at discharge, it's not necessarily relevant to all service users. This  
33 multi-agency, multi-morbidity complexity was arguably one factor that resulted in the small  
34 set of generic outcomes, that arguably differs from narrowly defined clinical core outcome set  
35 reported in past literature of many more outcomes [43,44].  
36  
37  
38

39 This study had several strengths. Our method is based on recommendations from an  
40 international panel of experts [25]. Inclusion of service-users and health-care professionals at  
41 every stage ensured that outcomes in the final core set embody shared priorities. The  
42 comprehensive and laborious long-list process ensured all potential outcomes were  
43 considered in the course of the consensus process. However, there were some limitations to  
44 our study. The research was only conducted in English, due to budgetary constraints,  
45 although our online rounds included participants from 12 countries. Furthermore, in many  
46 consensus meetings additional outcomes are often added, the method infrequently serves as  
47 means of reducing the number of outcomes included in the preliminary core outcome set  
48 from the Delphi [30]. However, in our case we found that the group did not agree with many  
49 of the outcomes and it was reduced to a very small COS of 4 items. This is beneficial in some  
50 ways, as we hope it is easier for researchers to operationalise a four-item core outcome set.  
51 However, to ensure that the spectrum of perceptions of safety by each group is addressed we  
52 recommend using the COS alongside an additional service user reported outcome measure  
53 (PROM) that encompasses the other outcomes that had high consensus in the Delphi.  
54  
55  
56  
57

58 The use of outcomes in mental health research and service, is becoming more contested in  
59 terms of what is meaningful and effective, it could be argued that core outcomes sets are less  
60

1  
2  
3 applicable to mental health populations than general health populations, given the complexity  
4 of mental health problems and the subjectivity of measuring it. However, as core outcomes  
5 sets are relatively uncommon in mental health, we believe (similar to other clinical  
6 populations) a small, agreed, feasible set of core outcomes will facilitate between study  
7 comparability and advancement in evidence collection [21,25].  
8  
9

## 10 **Future Directions**

11  
12 Development of this core outcome set involved participation of stakeholders from 12  
13 different countries; (primarily researchers) however, we recommend that further work should  
14 be undertaken to validate this core outcome set more widely, particularly in non-English  
15 speaking populations. The two of the final four outcomes and many of the preliminary 15  
16 outcomes to emerge from the Delphi, are not necessarily specific to mental health care  
17 transitions. Some outcomes are comparable to a similar core outcome set for care transitions  
18 of adolescents and young adults with special healthcare needs [45]. Future research may  
19 consider a ‘transitions of care’ core outcome set, to reduce the number of similar core  
20 outcome sets.  
21  
22

23  
24 Another key priority to make this core outcome set operationalised is to agree upon  
25 measurement criteria using the COSMIN guidelines [46]. We conducted some preliminary  
26 questionnaires with the Delphi panel to produce preliminary measurement recommendations,  
27 however there was very little agreement amongst panellists (see additional file 6). Another  
28 key priority to make this core outcome set operationalised is to agree upon measurement  
29 criteria using the COSMIN guidelines [46]. We conducted some preliminary questionnaires  
30 with the Delphi panel to produce preliminary measurement recommendations, however there  
31 was very little agreement amongst panellists (see additional file 6). The recommended  
32 measures by the panel were Kessler Psychological Distress (K10) and Recovery Quality of  
33 Life (ReQoL) within one month of discharge [47,48]. Readmission and suicide completed  
34 rates were recommended to be captured within 28 days of discharge using retrospective  
35 review of administrative data. However, these are only preliminary recommendations and we  
36 highly recommend a future study following COSMIN guidelines.  
37  
38  
39  
40

## 41 **Conclusion**

42  
43 The four outcomes included in our outcome set represent the consensus opinion of a group of  
44 service-users, health-care professionals, and international researchers and addresses an unmet  
45 necessity: assisting researchers in the design, implementation and reporting of interventions  
46 that aim to improve discharge from acute mental health settings. Ultimately, application of  
47 this core outcome set will enhance the relevance of future interventions to health-care  
48 professionals, the research community and service-users. If used, the core outcome set could  
49 provide more evidenced-based interventions, underpinned by theory of change outlining the  
50 relationships between the component of the intervention and the outcome it should  
51 improve[1,49]; which should increase service-user safety at this distressing time period.  
52  
53  
54

## 55 **Patients’ consent and permission to publish**

56  
57 All participants gave informed consent to be involved in the study ahead of data collection.  
58  
59

## 60 **Author Contributions**

1  
2  
3  
4 NT conceived the design of the study; conducted the literature search, meta-synthesis and  
5 Delphi; analysed the data; and drafted the majority of the manuscript. JW and NW  
6 contributed equally and provided oversight of the study design, analysed and synthesised the  
7 data and contributed significantly to the drafting of the manuscript. AG analysed and  
8 synthesised data, provided an expert by lived experience opinion on decisions made in  
9 regards to wording, study design, PPI involvement, and also contributed adaptations to the  
10 manuscript.  
11  
12

### 13 **Conflicts of Interest**

14  
15 The authors report no conflicts of interest  
16  
17

### 18 **Ethics Committee Approval**

19  
20 This research received a favourable ethics opinion from Nottingham University Business  
21 School Ethics Committee.  
22  
23

### 24 **Role of Funding Source**

25  
26 This research is funded by the NIHR Greater Manchester Patient Safety Translational  
27 Research Centre, they had no role in the writing of manuscript or decision to submit.  
28  
29

### 30 **Data Statement**

31  
32 Data is available upon reasonable request  
33  
34

### 35 **Acknowledgements**

36  
37 We would like to thank the patient and public involvement group for their help in designing  
38 the questionnaires.  
39

40 Figure 1 Caption: Process of reducing the outcomes to a set of four core outcomes  
41

42 **Word Count:** 5250  
43  
44

### 45 **References**

- 46  
47 [1] Tyler N, Wright N, Waring J. Interventions to improve discharge from acute adult  
48 mental health inpatient care to the community: systematic review and narrative  
49 synthesis. *BMC Health Serv Res* 2019;19:883. <https://doi.org/10.1186/s12913-019-4658-0>.  
50  
51 [2] Waring J, McDonald R, Harrison S. Safety and complexity: Inter-departmental  
52 relationships as a threat to patient safety in the operating department. *J Heal Organ*  
53 *Manag* 2006. <https://doi.org/10.1108/14777260610662753>.  
54  
55 [3] Wright N, Rowley E, Chopra A, Gregoriou K, Waring J. From admission to discharge  
56 in mental health services: a qualitative analysis of service user involvement. *Heal*  
57 *Expect* 2016;19:367–76. <https://doi.org/10.1111/hex.12361>.  
58  
59 [4] Walter F, Carr MJ, Mok PLH, Astrup A, Antonsen S, Pedersen CB, et al. Premature  
60 Mortality Among Patients Recently Discharged From Their First Inpatient Psychiatric

- Treatment. *JAMA Psychiatry* 2017;74:485–92.  
<https://doi.org/10.1001/jamapsychiatry.2017.0071>.
- [5] Burns J, Flynn S, Lowe R, Turnbull P, Baird A, Stones P, et al. The National Confidential Inquiry into Suicide and Homicide by People with Mental Illness. 2017.
- [6] Abraham O, Myers MN, Brothers AL, Montgomery J, Norman BA, Fabian T. Assessing need for pharmacist involvement to improve care coordination for patients on LAI antipsychotics transitioning from hospital to home: A work system approach. *Res Social Adm Pharm* 2017;13:1004–13.  
<https://doi.org/https://dx.doi.org/10.1016/j.sapharm.2017.02.006>.
- [7] Exbrayat S, Coudrot C, Gourdon X, Gay A, Sevos J, Pellet J, et al. Effect of telephone follow-up on repeated suicide attempt in patients discharged from an emergency psychiatry department: a controlled study. *BMC Psychiatry* 2017;17.  
<https://doi.org/10.1186/s12888-017-1258-6>.
- [8] Vigod SN, Kurdyak PA, Dennis C-L, Leszcz T, Taylor VH, Blumberger DM, et al. Transitional interventions to reduce early psychiatric readmissions in adults: systematic review. *Br J Psychiatry* 2013;202:187–94.  
<https://doi.org/10.1192/bjp.bp.112.115030>.
- [9] Waring J, Bishop S, Marshall F, Tyler N, Vickers R. An ethnographic study comparing approaches to inter-professional knowledge sharing and learning in discharge planning and care transitions. *J Heal Organ Manag* 2019.
- [10] Walker SA, Naji SA, Howie FL, Andrew J, Cameron IM, Eagles JM. The effectiveness of psychiatric discharge coordinators. *Prim Care Psychiatry* 2000.  
<https://doi.org/10.1185/135525700543370>.
- [11] Bennewith O, Evans J, Donovan J, Paramasivan S, Owen-Smith A, Hollingworth W, et al. A Contact-Based Intervention for People Recently Discharged from Inpatient Psychiatric Care: A Pilot Study. *Arch Suicide Res* 2014.  
<https://doi.org/10.1080/13811118.2013.838196>.
- [12] D'souza R. Improving Treatment Adherence and Longitudinal Outcomes in Patients with a Serious Mental Illness by Using Telemedicine. *J Telemed Telecare* 2002.  
<https://doi.org/10.1177/1357633X020080S251>.
- [13] Exbrayat S, Coudrot C, Gourdon X, Gay A, Sevos J, Pellet J, et al. Effect of telephone follow-up on repeated suicide attempt in patients discharged from an emergency psychiatry department: A controlled study. *BMC Psychiatry* 2017.  
<https://doi.org/10.1186/s12888-017-1258-6>.
- [14] Forchuk C, Martin ML, Chan YL, Jensen E. Therapeutic relationships: From psychiatric hospital to community. *J Psychiatr Ment Health Nurs* 2005;12:556–64.  
<https://doi.org/10.1111/j.1365-2850.2005.00873.x>.
- [15] Juven-Wetzler A, Bar-Ziv D, Cwikel-Hamzany S, Abudy A, Peri N, Zohar J. A pilot study of the “Continuation of Care” model in “revolving-door” patients. *Eur Psychiatry* 2012;27:229–33. <https://doi.org/10.1016/j.eurpsy.2011.05.003>.
- [16] Jensen E, Chapman P, Davis A, Forchuk C, Seymour B, Witcher P, et al. An Evaluation of Community-Based Discharge Planning in Acute Mental Health Care. *Can J Community Ment Heal* 2010;29:111–24. <https://doi.org/10.7870/cjcmh-2010-0038>.
- [17] Shaffer SL, Hutchison SL, Ayers AM, Goldberg RW, Herman D, Duch DA, et al. Brief critical time intervention to reduce psychiatric rehospitalization. *Psychiatr Serv* 2015;66:1155–61. <https://doi.org/http://dx.doi.org/10.1176/appi.ps.201400362>.
- [18] Tomita A, Herman DB. The Impact of Critical Time Intervention in Reducing Psychiatric Rehospitalization After Hospital Discharge. *Psychiatr Serv* 2012.  
<https://doi.org/10.1176/appi.ps.201100468>.

- 1  
2  
3 [19] Steffen S, Kösters M, Becker T, Puschner B. Discharge planning in mental health care:  
4 A systematic review of the recent literature. *Acta Psychiatr Scand* 2009;120:1–9.  
5 <https://doi.org/10.1111/j.1600-0447.2009.01373.x>.
- 6 [20] Steffen S, Kösters M, Becker T, Puschner B. Discharge planning in mental health care:  
7 A systematic review of the recent literature. *Acta Psychiatr Scand* 2009;120:1–9.  
8 <https://doi.org/http://dx.doi.org/10.1111/j.1600-0447.2009.01373.x>.
- 9 [21] Williamson PR, Altman DG, Bagley H, Barnes KL, Blazeby JM, Brookes ST, et al.  
10 The COMET Handbook: Version 1.0. *Trials* 2017. [https://doi.org/10.1186/s13063-](https://doi.org/10.1186/s13063-017-1978-4)  
11 [017-1978-4](https://doi.org/10.1186/s13063-017-1978-4).
- 12 [22] Williamson PR, Altman DG, Blazeby JM, Clarke M, Devane D, Gargon E, et al.  
13 Developing core outcome sets for clinical trials: Issues to consider. *Trials* 2012.  
14 <https://doi.org/10.1186/1745-6215-13-132>.
- 15 [23] Lang K. Outcomes for mental health services: what really matters? | HSR UK. 2019.
- 16 [24] Waring J, Marshall F, Bishop S, Sahota O, Walker M, Currie G, et al. An ethnographic  
17 study of knowledge sharing across the boundaries between care processes, services and  
18 organisations: the contributions to ‘safe’ hospital discharge. *Heal Serv Deliv Res* 2014.  
19 <https://doi.org/10.3310/hsdr02290>.
- 20 [25] Kirkham JJ, Davis K, Altman DG, Blazeby JM, Clarke M, Tunis S, et al. Core  
21 Outcome Set-STAndards for Development: The COS-STAD recommendations. *PLoS*  
22 *Med* 2017. <https://doi.org/10.1371/journal.pmed.1002447>.
- 23 [26] Pedersen ER, Helmuth ED, Marshall GN, Schell TL, PunKay M, Kurz J. Using  
24 Facebook to Recruit Young Adult Veterans: Online Mental Health Research. *JMIR*  
25 *Res Protoc* 2015. <https://doi.org/10.2196/resprot.3996>.
- 26 [27] Contributed Talks. *J Evid Based Med* 2019;12:24–7.  
27 <https://doi.org/10.1111/jebm.12336>.
- 28 [28] Thomas J, Harden A. Methods for the thematic synthesis of qualitative research in  
29 systematic reviews. *BMC Med Res Methodol* 2008;8:45. [https://doi.org/10.1186/1471-](https://doi.org/10.1186/1471-2288-8-45)  
30 [2288-8-45](https://doi.org/10.1186/1471-2288-8-45).
- 31 [29] Qualtrics. Qualtrics: The World’s Leading Research & Insights Platform. Qualtrics  
32 2016. <https://doi.org/10.3109/03639045.2013.790903>.
- 33 [30] Preston CC, Colman AM. Optimal number of response categories in rating scales:  
34 Reliability, validity, discriminating power, and respondent preferences. *Acta Psychol*  
35 (Amst) 2000;104:1–15. [https://doi.org/10.1016/S0001-6918\(99\)00050-5](https://doi.org/10.1016/S0001-6918(99)00050-5).
- 36 [31] Hsu C, Sandford B. The delphi technique: making sense of consensus. *Pract*  
37 *Assessment, Res Eval* 2007;12:1–8. [https://doi.org/10.1016/S0169-2070\(99\)00018-7](https://doi.org/10.1016/S0169-2070(99)00018-7).
- 38 [32] Bell BG, Spencer R, Avery AJ, Campbell SM. Tools for measuring patient safety in  
39 primary care settings using the RAND/UCLA appropriateness method. *BMC Fam*  
40 *Pract* 2014;15:110. <https://doi.org/10.1186/1471-2296-15-110>.
- 41 [33] Avery AJ, Dex GM, Mulvaney C, Serumaga B, Spencer R, Lester HE, et al.  
42 Development of prescribing-safety indicators for GPs using the RAND  
43 Appropriateness Method. *Br J Gen Pract* 2011;61:e526–36.  
44 <https://doi.org/10.3399/bjgp11X588501>.
- 45 [34] Kirkham JJ, Gorst S, Altman DG, Blazeby J, Clarke M, Devane D, et al. COS-STAR:  
46 A reporting guideline for studies developing core outcome sets (protocol). *Trials* 2015.  
47 <https://doi.org/10.1186/s13063-015-0913-9>.
- 48 [35] Walter F, Carr MJ, Mok PLH, Antonsen S, Pedersen CB, Shaw J, et al. Suicide  
49 Methods and Specific Types of Accidental Death and Fatal Poisoning Among  
50 Discharged Psychiatric Patients: A National Cohort Study. *J Clin Psychiatry* 2018;79.  
51 <https://doi.org/10.4088/JCP.17m11809>.
- 52 [36] Ali AM, Bottle A. How do we interpret readmission rates? *BMJ* 2018.
- 53  
54  
55  
56  
57  
58  
59  
60



- 1  
2  
3 <https://doi.org/10.1136/bmj.k3104>.
- 4 [37] Tomita A, Lukens EP, Herman DB. Mediation analysis of critical time intervention for  
5 persons living with serious mental illnesses: assessing the role of family relations in  
6 reducing psychiatric rehospitalization. *Psychiatr Rehabil J* 2014;37:4–10.  
7 <https://doi.org/10.1037/prj0000015>.
- 8 [38] Lovell K, Bee P, Brooks H, Cahoon P, Callaghan P, Carter L-A, et al. Embedding  
9 shared decision-making in the care of patients with severe and enduring mental health  
10 problems: The EQUIP pragmatic cluster randomised trial. *PLoS One*  
11 2018;13:e0201533. <https://doi.org/10.1371/journal.pone.0201533>.
- 12 [39] Falzarano M, health GZ-J of allied, 2013 undefined. Seeking consensus through the  
13 use of the Delphi technique in health sciences research. *IngentaconnectCom* n.d.
- 14 [40] Forchuk C, Russell G, Kingston-Macclure S, Turner K, Dill S. From psychiatric ward  
15 to the streets and shelters. *J Psychiatr Ment Health Nurs* 2006;13:301–8.  
16 <https://doi.org/http://dx.doi.org/10.1111/j.1365-2850.2006.00954.x>.
- 17 [41] Forchuk C, Godin M, Hoch JS, Kingston-MacClure S, Jeng M (Mo) S, Puddy L, et al.  
18 Preventing Homelessness After Discharge from Psychiatric Wards: Perspectives of  
19 Consumers and Staff. *J Psychosoc Nurs Ment Health Serv* 2013;51:24–31.  
20 <https://doi.org/10.3928/02793695-20130130-02>.
- 21 [42] Tomita A, Herman DB. The Role of a Critical Time Intervention on the Experience of  
22 Continuity of Care Among Persons With Severe Mental Illness After Hospital  
23 Discharge. *J Nerv Ment Dis* 2015;203:65–70.  
24 <https://doi.org/10.1097/NMD.0000000000000224>.
- 25 [43] Fish R, Sanders C, Adams R, Brewer J, Brookes ST, DeNardo J, et al. A core outcome  
26 set for clinical trials of chemoradiotherapy interventions for anal cancer (CORMAC): a  
27 patient and health-care professional consensus. *Lancet Gastroenterol Hepatol* 2018.  
28 [https://doi.org/10.1016/S2468-1253\(18\)30264-4](https://doi.org/10.1016/S2468-1253(18)30264-4).
- 29 [44] Boers M, Brooks P, Simon LS, Strand V, Tugwell P. OMERACT: An international  
30 initiative to improve outcome measurement in rheumatology. *Clin Exp Rheumatol*  
31 2005;23. <https://doi.org/10.1186/1745-6215-8-38>.
- 32 [45] Fair C, Cuttance J, Sharma N, Maslow G, Wiener L, Betz C, et al. International and  
33 Interdisciplinary Identification of Health Care Transition Outcomes. *JAMA Pediatr*  
34 2016;170:205. <https://doi.org/10.1001/jamapediatrics.2015.3168>.
- 35 [46] Mokkink LB, Terwee CB, Knol DL, Stratford PW, Alonso J, Patrick DL, et al. The  
36 COSMIN checklist for evaluating the methodological quality of studies on  
37 measurement properties: A clarification of its content. *BMC Med Res Methodol*  
38 2010;10. <https://doi.org/10.1186/1471-2288-10-22>.
- 39 [47] Keetharuth AD, Brazier J, Connell J, Bjorner JB, Carlton J, Buck ET, et al. Recovering  
40 Quality of Life (ReQoL): A new generic self-reported outcome measure for use with  
41 people experiencing mental health difficulties. *Br J Psychiatry* 2018.  
42 <https://doi.org/10.1192/bjp.2017.10>.
- 43 [48] Andrews G, Slade T. Interpreting scores on the Kessler Psychological Distress Scale  
44 (K10). *Aust N Z J Public Health* 2001. <https://doi.org/10.1111/j.1467-842X.2001.tb00310.x>.
- 45 [49] Davidoff F, Dixon-Woods M, Leviton L, Michie S. Demystifying theory and its use in  
46 improvement. *BMJ Qual Saf* 2015;24:228–38. <https://doi.org/10.1136/bmjqs-2014-003627>.
- 47  
48  
49  
50  
51  
52  
53  
54  
55  
56  
57  
58  
59  
60

1  
2  
3  
4  
5  
6  
7  
8  
9  
10  
11  
12  
13  
14  
15  
16  
17  
18  
19  
20  
21  
22  
23  
24  
25  
26  
27  
28  
29  
30  
31  
32  
33  
34  
35  
36  
37  
38  
39  
40  
41  
42  
43  
44  
45  
46  
47  
48  
49  
50  
51  
52  
53  
54  
55  
56  
57  
58  
59  
60



Process of reducing the outcomes to a set of four core outcomes

133x142mm (96 x 96 DPI)

## Supplementary Material

**File 1: Table of questions asked in qualitative questionnaire**

| Group                      | Question                                                                                                                                                      |
|----------------------------|---------------------------------------------------------------------------------------------------------------------------------------------------------------|
| All Participants           | What would make discharge from an acute mental health ward <b>safe</b> in your opinion?                                                                       |
| All Participants           | What would make discharge from an acute mental health ward <b>effective</b> in your opinion?                                                                  |
| All Participants           | What would you like to see prioritised for research into discharge from an acute ward?                                                                        |
| All Participants           | Can you think of any important outcomes to measure in research assessing discharge interventions?                                                             |
| Service User               | What do you think is the most difficult aspect of discharge from a mental health acute ward?                                                                  |
| Service User               | What might improve discharge from a mental health ward?                                                                                                       |
| Service User               | Was there any one person/group/intervention which really made a difference for you? If so what was it? What made it so powerful?                              |
| Service User               | Do you have any other feelings or concerns not addressed in previous questions?                                                                               |
| Family member/carer        | What do you consider to be the most difficult components of discharge for your family member/friend from an acute mental health ward?                         |
| Family member/carer        | What types of improvement would you expect to see in your family member/friend following a successful discharge from an acute mental health ward?             |
| Mental health professional | What do you consider to be the most difficult aspects of discharge from an acute unit for your service-users?                                                 |
| Mental health professional | Are there any changes/behaviours you would expect to see in a service-user during or following a safe and/or effective discharge?                             |
| Researchers                | If applicable, what outcomes did you measure in past research (of discharge interventions)?                                                                   |
| Researchers                | Are there any concepts that you think are important to measure, but chose not to, due to not having a suitable measurement instrument?                        |
| End users of research      | If you were looking to use research to inform changes to the discharge procedure within your professional role, what outcomes would you like to see reported? |
| End users of research      | In your opinion, what measurements would persuade you that a discharge intervention is effective?                                                             |



## File 2: Results of Meta-synthesis of Outcomes and data from questionnaire

### Clinical

| From Review                     | Additional from Meta-synthesis                                             |
|---------------------------------|----------------------------------------------------------------------------|
| Reoccurrence (i.e. Relapse)     | Stability                                                                  |
| Clinical Recovery               | Physical Health and Wellbeing                                              |
| Personal Recovery               | Iatrogenic harm (patient safety incidents- harm caused by the care system) |
| Substance Misuse (inc. alcohol) | Serious accidental injury                                                  |
| Self-injury (i.e. harm to self) | Mortality                                                                  |
| Suicide Risk                    | Mental health and illness (symptoms/psychological distress)                |
| Suicidal Ideation               |                                                                            |
| Suicide Attempted               |                                                                            |
| Suicide Completed               |                                                                            |
| Medication Knowledge            |                                                                            |
| Medication Adherence            |                                                                            |
| Medication Side Effects         |                                                                            |
| Medication Management           |                                                                            |
| Global Functioning              |                                                                            |

### Service

| From Review                                                  | Additional from Meta-synthesis                                            |
|--------------------------------------------------------------|---------------------------------------------------------------------------|
| Emergency department visits post discharge                   | Police intervention post discharge                                        |
| Readmission                                                  | Engagement with psychological intervention                                |
| Length of stay pre-discharge                                 | Engagement with community services                                        |
| Length of stay post-discharge (i.e. subsequent readmissions) | Availability of appropriate community support (i.e. allocated key worker) |
| Outpatient appointment/visit adherence                       | Length of time before follow up/aftercare                                 |
| Service use                                                  | Leaving the hospital against medical advice                               |
|                                                              | Service user involvement in decision making (shared decision making)      |
|                                                              | Serious incidents (i.e. serious incidents reported formally)              |

### Satisfaction

| From Review                                    | Additional from Meta-synthesis                                                                                       |
|------------------------------------------------|----------------------------------------------------------------------------------------------------------------------|
| Service user expectations of care              | Professionals/care teams satisfaction with information provision at discharge                                        |
| Service user satisfaction with discharge       | Service user satisfaction with information provision at discharge (e.g. regarding medication, risk, crisis planning) |
| Service user experience of discharge           |                                                                                                                      |
| Service user satisfaction with treatment       |                                                                                                                      |
| Carer/family/other satisfaction with discharge |                                                                                                                      |
| Staff satisfaction with discharge              |                                                                                                                      |

### Personal

| From Review                                              | Additional from Meta-synthesis                                                    |
|----------------------------------------------------------|-----------------------------------------------------------------------------------|
| Hopelessness                                             | Feelings of safety                                                                |
| Boredom                                                  | Feelings of support (from various groups- i.e. family, professionals and friends) |
| Loneliness                                               | Experience of stigma                                                              |
| Isolation                                                | Quality of interpersonal relationships (friends and family)                       |
| Coping skills                                            | Self-management                                                                   |
| Concern/anxiety about discharge                          |                                                                                   |
| Autonomy (e.g. independence, autonomous decision making) |                                                                                   |

|                                                |  |
|------------------------------------------------|--|
| Housing Stability                              |  |
| Discharge to appropriate accommodation         |  |
| Service user knowledge of own condition        |  |
| Quality of life                                |  |
| Community participation                        |  |
| Violence                                       |  |
| Aggression                                     |  |
| Victim of crime                                |  |
| Stable relationships with health professionals |  |
| Employment                                     |  |

### Discharge Planning

| From Review | Additional from Meta-synthesis                                                                                            |
|-------------|---------------------------------------------------------------------------------------------------------------------------|
|             | Service user involvement in discharge planning                                                                            |
|             | Family/carer involvement in discharge planning                                                                            |
|             | Advocate involvement in discharge planning                                                                                |
|             | Completion of planned care                                                                                                |
|             | Continuity of contact                                                                                                     |
|             | Service user readiness for discharge (incl. preparation)                                                                  |
|             | Clinical readiness for discharge                                                                                          |
|             | Experience of coercion at discharge (e.g. feeling forced to leave)                                                        |
|             | Provision of financial support (e.g. benefits advice, debt advice)                                                        |
|             | Delays in expected discharge                                                                                              |
|             | Service availability (e.g. availability of community services, CPN, follow-up, social worker, bed in residential service) |
|             | Family/carer/other readiness for discharge                                                                                |
|             | Staff understanding of safe and effective discharge                                                                       |
|             | Plan for community engagement                                                                                             |
|             | Is there a plan for care post discharge created                                                                           |
|             | Has the plan for care post-discharge been communicated with patient                                                       |
|             | Has information about the discharge been reported to other relevant services                                              |

### Changes/Combinations

| Outcomes from Review                  | Changes/Combinations                                                          |
|---------------------------------------|-------------------------------------------------------------------------------|
| Social Recovery                       | Combined into quality of interpersonal relationships                          |
| Relapse                               | PPI suggestion change to reoccurrence                                         |
| Self-harm                             | PPI suggestion change to self-injury                                          |
| Depression                            | Combined into symptoms                                                        |
| Anxiety                               | Combined into symptoms                                                        |
| Illegal drug use                      | Combined into substance misuse                                                |
| Alcohol use                           | Combined into substance misuse                                                |
| Addiction severity                    | Combined into substance misuse                                                |
| Crisis planning                       | Combined into information provision                                           |
| Risk communication                    | Combined into information provision                                           |
| Allocated worker                      | Combined into availability of appropriate community support                   |
| Better knowledge transfer             | Combined into information provision (professional)                            |
| Therapeutic alliance                  | Combined into stable relationships with HPs                                   |
| Contact with ambulatory care          | Combined into emergency visits                                                |
| Treatment adherence                   | Combined into medication adherence and engagement with psychological services |
| 7 day follow up                       | Changed to length of time before follow up for global audience                |
| Psychological distress                | Combined into symptoms                                                        |
| Family relations                      | Combined into quality of interpersonal relationships                          |
| Community integration and functioning | Combined into Community participation                                         |

### Outcomes Removed from Process

| Outcomes from Review      | Reason       |
|---------------------------|--------------|
| Antipsychotic Politherapy | Too specific |
| Autistic life             | Too specific |

|                                        |                           |
|----------------------------------------|---------------------------|
| Medication Problems                    | Too vague                 |
| Functional Recovery                    | Meaning not explicit      |
| Satisfaction with service in community | Not relevant for this COS |
| Global satisfaction with discharge     | Meaning not explicit      |
| Quality of care                        | Too vague                 |
| Treatment decision making              | Not relevant for this COS |
| Financial cost to provider             | Impossible to measure     |
| Number of beds                         | Too vague                 |
| Staff workload                         | Too vague                 |
| Freedom                                | Too vague                 |
| Self-activity                          | Too vague                 |

#### Carer outcomes

| Outcomes from Review               | Decision                 |
|------------------------------------|--------------------------|
| Caregiver Burden                   | Yes                      |
| Caregiver Health Status            | No (too specific)        |
| Caregiver Knowledge about illness  | Yes                      |
| <b>From Synthesis</b>              |                          |
| Carer support                      | No                       |
| Relationship between family and SU | No (probably a variable) |

File 3: Participant Demographics

| Categories |               |                     |                          |             |                       |            |            |            |       |               |                          |  |
|------------|---------------|---------------------|--------------------------|-------------|-----------------------|------------|------------|------------|-------|---------------|--------------------------|--|
| Group      | Service Users | Families and Carers | Healthcare Professionals | Researchers | End-users of Research |            |            |            |       |               |                          |  |
| <b>n</b>   | 27            | 17                  | 39                       | 37          | 15                    |            |            |            |       |               |                          |  |
| Gender     | Male          | Female              | Other                    |             |                       |            |            |            |       |               |                          |  |
| <b>n</b>   | 28            | 63                  | 0                        |             |                       |            |            |            |       |               |                          |  |
| Age        | 18-24         | 25-34               | 35-44                    | 45-54       | 55-64                 | 65-74      | 75-84      |            |       |               |                          |  |
| <b>n</b>   | 4             | 20                  | 30                       | 24          | 10                    | 4          | 1          |            |       |               |                          |  |
| Location   | International | East of England     | East Midlands            | London      | North West            | North East | South East | South West | Wales | West Midlands | Yorkshire and the Humber |  |
| <b>n</b>   | 24            | 2                   | 11                       | 7           | 16                    | 1          | 6          | 5          | 0     | 13            | 7                        |  |

Locations for International participants

| Country          | N |
|------------------|---|
| Australia        | 4 |
| Canada           | 2 |
| China            | 1 |
| France           | 1 |
| Germany          | 1 |
| Iran             | 1 |
| Italy            | 1 |
| Northern Ireland | 1 |
| South Africa     | 1 |
| Switzerland      | 4 |
| USA              | 7 |

1  
2  
3  
4  
5  
6  
7  
8  
9  
10  
11  
12  
13  
14  
15  
16  
17  
18  
19  
20  
21  
22  
23  
24  
25  
26  
27  
28  
29  
30  
31  
32  
33  
34  
35  
36  
37  
38  
39  
40  
41  
42  
43  
44  
45  
46  
47

**File 4: Full list of Delphi outcomes, consensus levels, and round of inclusion/exclusion**

|                                                                                                                      | R1 Percentage agreement | R1 Percentage Disagreement | Median | Researchers | Sus and carers | HCPs and DMs | Round 2 Status | Round 2 | Researcher | Sus and carers | HCP and DMs | Median |
|----------------------------------------------------------------------------------------------------------------------|-------------------------|----------------------------|--------|-------------|----------------|--------------|----------------|---------|------------|----------------|-------------|--------|
| Service user involvement in discharge planning (inc. feeling listened to)                                            | 87%                     | 4%                         | 7      | 65%         | 100%           | 95%          | Include        |         |            |                |             |        |
| Functioning (health, social, etc.)                                                                                   | 83%                     | 3%                         | 6      | 69%         | 100%           | 81%          | Include        |         |            |                |             |        |
| Mental health and illness (symptom/psychological distress)                                                           | 83%                     | 3%                         | 6      | 73%         | 91%            | 86%          | Include        |         |            |                |             |        |
| Personal Recovery                                                                                                    | 82%                     | 1%                         | 6      | 75%         | 86%            | 86%          | Include        |         |            |                |             |        |
| service user understanding of discharge plan                                                                         | 81%                     | 3%                         | 6      | 65%         | 91%            | 86%          | Include        |         |            |                |             |        |
| Quality of life                                                                                                      | 81%                     | 1%                         | 6.5    | 65%         | 90%            | 86%          | Include        |         |            |                |             |        |
| suicide Completed                                                                                                    | 80%                     | 4%                         | 7      | 80%         | 90%            | 68%          | Include        |         |            |                |             |        |
| Readmission                                                                                                          | 80%                     | 6%                         | 6      | 77%         | 77%            | 86%          | Include        |         |            |                |             |        |
| service user involvement in decision making (shared decision making)                                                 | 77%                     | 4%                         | 7      | 50%         | 95%            | 86%          | Include        |         |            |                |             |        |
| service user satisfaction with information provision at discharge (e.g. regarding medication, risk, crisis planning) | 77%                     | 6%                         | 6      | 65%         | 86%            | 81%          | Include        |         |            |                |             |        |
| service user knowledge of how to access community support (i.e. in an emergency)                                     | 77%                     | 3%                         | 6      | 58%         | 91%            | 86%          | Include        |         |            |                |             |        |
| Recurrence (i.e. relapse)                                                                                            | 75%                     | 1%                         | 6      | 58%         | 91%            | 76%          | Include        |         |            |                |             |        |
| Suicide Attempted                                                                                                    | 75%                     | 4%                         | 6      | 62%         | 86%            | 81%          | Include        |         |            |                |             |        |
| discharge to appropriate accommodation                                                                               | 75%                     | 3%                         | 6      | 69%         | 91%            | 67%          | Include        |         |            |                |             |        |
| service user satisfaction with treatment                                                                             | 74%                     | 7%                         | 6      | 58%         | 91%            | 71%          | Re-present     | 59%     | 43%        | 67%            | 70%         | 6      |
| service Availability (e.g. availability of community service, CPN, follow-up, social worker,                         | 74%                     | 7%                         | 6      | 46%         | 86%            | 95%          | Re-present     | 45%     | 27%        | 67%            | 50%         | 5      |

|                                                                                  |     |     |   |     |     |     |            |     |     |     |     |   |  |
|----------------------------------------------------------------------------------|-----|-----|---|-----|-----|-----|------------|-----|-----|-----|-----|---|--|
| bed in residential service)                                                      |     |     |   |     |     |     |            |     |     |     |     |   |  |
| Existence of a plan for community engagement/ care post discharge                | 74% | 4%  | 6 | 58% | 77% | 90% | Re-present | 72% | 57% | 83% | 90% | 6 |  |
| Feeling of support (from various group i.e. family, professional, friends)       | 72% | 4%  | 6 | 65% | 77% | 71% | Re-present | 43% | 33% | 50% | 50% | 5 |  |
| Suicide Risk                                                                     | 71% | 3%  | 6 | 58% | 77% | 81% | Re-present | 42% | 43% | 56% | 25% | 5 |  |
| Family/carer/other involvement in discharge planning (inc. feeling listened too) | 71% | 6%  | 6 | 65% | 77% | 75% | Re-present | 58% | 50% | 67% | 65% | 6 |  |
| service user readiness for discharge (incl. preparation)                         | 71% | 6%  | 6 | 58% | 77% | 81% | Re-present | 35% | 27% | 50% | 30% | 5 |  |
| Feeling of safety                                                                | 70% | 7%  | 6 | 65% | 73% | 71% | Re-present | 36% | 37% | 56% | 25% | 5 |  |
| service user satisfaction with discharge                                         | 69% | 4%  | 6 | 50% | 76% | 86% | Re-present | 45% | 40% | 50% | 50% | 5 |  |
| Physical Health and Wellbeing                                                    | 68% | 3%  | 6 | 50% | 77% | 81% | Re-present | 49% | 43% | 61% | 45% | 5 |  |
| service user experience of discharge                                             | 68% | 10% | 6 | 46% | 86% | 76% | Re-present | 29% | 23% | 44% | 30% | 5 |  |
| Housing stability                                                                | 68% | 3%  | 6 | 62% | 77% | 67% | Re-present | 41% | 37% | 39% | 40% | 5 |  |
| Coping skills                                                                    | 68% | 6%  | 6 | 50% | 77% | 80% | Re-present | 39% | 40% | 50% | 35% | 5 |  |
| Continuity of contact                                                            | 68% | 6%  | 6 | 64% | 77% | 62% | Re-present | 65% | 63% | 72% | 60% | 6 |  |
| Mortality                                                                        | 67% | 7%  | 6 | 68% | 76% | 57% | Re-present | 42% | 43% | 50% | 30% | 5 |  |
| self management                                                                  | 67% | 4%  | 6 | 46% | 86% | 71% | Re-present | 29% | 23% | 39% | 20% | 5 |  |
| Length of time before follow up/aftercare                                        | 65% | 6%  | 6 | 46% | 77% | 76% | Re-present | 58% | 43% | 83% | 65% | 6 |  |
| Isolation                                                                        | 65% | 9%  | 6 | 46% | 73% | 81% | Re-present | 55% | 50% | 72% | 45% | 6 |  |
| Availability of appropriate community support (i.e. allocated key worker)        | 64% | 9%  | 6 | 38% | 82% | 76% | Re-present | 52% | 27% | 72% | 70% | 6 |  |
| service user knowledge of own condition                                          | 64% | 6%  | 6 | 42% | 91% | 62% | Re-present | 36% | 30% | 50% | 35% | 4 |  |
| service user expectation of care                                                 | 63% | 3%  | 6 | 35% | 76% | 81% | Re-present | 28% | 20% | 28% | 40% | 4 |  |
| Hopelessness                                                                     | 63% | 9%  | 6 | 54% | 67% | 71% | Re-present | 46% | 47% | 44% | 45% | 5 |  |
| suicidal Ideation                                                                | 62% | 7%  | 6 | 46% | 77% | 67% | Re-present | 51% | 50% | 61% | 45% | 6 |  |

1  
2  
3  
4  
5  
6  
7  
8  
9  
10  
11  
12  
13  
14  
15  
16  
17  
18  
19  
20  
21  
22  
23  
24  
25  
26  
27  
28  
29  
30  
31  
32  
33  
34  
35  
36  
37  
38  
39  
40  
41  
42  
43  
44  
45  
46  
47

|                                                                             |     |     |   |     |     |     |            |     |     |     |     |   |
|-----------------------------------------------------------------------------|-----|-----|---|-----|-----|-----|------------|-----|-----|-----|-----|---|
| Medication Adherence                                                        | 62% | 4%  | 6 | 50% | 82% | 52% | Re-present | 45% | 47% | 44% | 40% | 5 |
| Loneliness                                                                  | 62% | 10% | 6 | 42% | 68% | 81% | Re-present | 41% | 37% | 56% | 30% | 5 |
| Information about the discharge reported to other relevant service          | 62% | 9%  | 6 | 50% | 73% | 71% | Re-present | 48% | 37% | 78% | 40% | 5 |
| service user experience of coercion at discharge                            | 61% | 6%  | 6 | 46% | 77% | 63% | Re-present | 43% | 40% | 67% | 35% | 5 |
| Clinical readiness for discharge                                            | 60% | 6%  | 6 | 48% | 67% | 67% | Re-present | 36% | 30% | 39% | 40% | 5 |
| Medication side Effects                                                     | 59% | 7%  | 6 | 38% | 77% | 67% | Re-present | 41% | 30% | 61% | 35% | 5 |
| Emergency department visit post discharge                                   | 59% | 6%  | 6 | 58% | 68% | 52% | Re-present | 62% | 63% | 67% | 60% | 6 |
| Quality of interpersonal relationship (friend and family)                   | 59% | 7%  | 6 | 50% | 77% | 52% | Re-present | 46% | 40% | 72% | 35% | 5 |
| Iatrogenic harm (patient safety incident or harm caused by the care system) | 59% | 4%  | 6 | 40% | 64% | 71% | Re-present | 51% | 37% | 72% | 50% | 6 |
| Completion of planned care                                                  | 59% | 7%  | 6 | 50% | 76% | 52% | Re-present | 39% | 40% | 56% | 30% | 5 |
| Concern/anxiety about discharge                                             | 58% | 9%  | 6 | 31% | 73% | 76% | Re-present | 26% | 17% | 33% | 35% | 4 |
| Autonomy (e.g. independence, autonomous decision making)                    | 57% | 3%  | 6 | 35% | 73% | 70% | Re-present | 36% | 27% | 50% | 30% | 5 |
| staff understanding of safe and effective discharge                         | 57% | 10% | 6 | 40% | 68% | 67% | Re-present | 41% | 30% | 67% | 35% | 4 |
| self injury (i.e. harm to self)                                             | 57% | 6%  | 6 | 50% | 64% | 52% | Re-present | 49% | 53% | 61% | 35% | 5 |
| Financial support (e.g. benefit advice, debt advice)                        | 57% | 9%  | 6 | 38% | 82% | 57% | Re-present | 46% | 40% | 72% | 30% | 5 |
| stable relationship with health professional                                | 55% | 4%  | 6 | 38% | 71% | 58% | Re-present | 33% | 37% | 50% | 20% | 5 |
| Medication Management                                                       | 54% | 3%  | 6 | 42% | 71% | 52% | Re-present | 42% | 37% | 61% | 40% | 5 |
| Carer/family/other satisfaction with discharge                              | 54% | 9%  | 6 | 35% | 68% | 57% | Re-present | 36% | 27% | 61% | 35% | 4 |
| Clinical Recovery                                                           | 53% | 7%  | 6 | 60% | 55% | 43% | Re-present | 36% | 33% | 50% | 30% | 5 |
| service use                                                                 | 52% | 4%  | 6 | 46% | 50% | 63% | Re-present | 30% | 33% | 39% | 15% | 4 |
| Violence                                                                    | 52% | 9%  | 6 | 46% | 60% | 48% | Re-present | 29% | 33% | 33% | 15% | 4 |
| Victim of crime                                                             | 52% | 12% | 6 | 38% | 68% | 48% | Re-present | 28% | 30% | 44% | 10% | 4 |
| Experience of stigma                                                        | 52% | 7%  | 6 | 42% | 59% | 57% | Re-present | 30% | 20% | 50% | 25% | 4 |

|                                                                                |                                 |     |     |     |     |     |                |         |     |     |        |     |   |
|--------------------------------------------------------------------------------|---------------------------------|-----|-----|-----|-----|-----|----------------|---------|-----|-----|--------|-----|---|
| Engagement with psychological intervention                                     | 51%                             | 4%  | 6   | 35% | 45% | 76% | Re-present     | 33%     | 30% | 67% | 5%     | 4   |   |
| Cancellation or change to follow up meeting                                    | 51%                             | 12% | 6   | 19% | 82% | 57% | Re-present     | 42%     | 23% | 67% | 40%    | 5   |   |
| serious incident (i.e. serious incident reported formally)                     | 50%                             | 6%  | 5.5 | 44% | 45% | 62% | Exclude        |         |     |     |        |     |   |
| Employment                                                                     | 50%                             | 7%  | 5.5 | 58% | 48% | 38% | Exclude        |         |     |     |        |     |   |
| Medication Knowledge                                                           | 49%                             | 9%  | 5   | 35% | 64% | 52% | Exclude        |         |     |     |        |     |   |
| Engagement with community service                                              | 49%                             | 4%  | 5   | 35% | 50% | 71% | Exclude        |         |     |     |        |     |   |
| Length of stay pre-discharge                                                   | 46%                             | 10% | 5   | 38% | 55% | 48% | Exclude        |         |     |     |        |     |   |
| Family/carer/other readiness for discharge                                     | 46%                             | 9%  | 5   | 42% | 55% | 43% | Exclude        |         |     |     |        |     |   |
| Leaving the hospital against medical advice                                    | 45%                             | 14% | 5   | 46% | 55% | 33% | Exclude        |         |     |     |        |     |   |
| Outpatient appointment/visit adherence                                         | 44%                             | 4%  | 5   | 54% | 57% | 24% | Exclude        |         |     |     |        |     |   |
| Aggression                                                                     | 44%                             | 10% | 5   | 42% | 43% | 48% | Exclude        |         |     |     |        |     |   |
| Delay in expected discharge                                                    | 43%                             | 13% | 5   | 12% | 67% | 57% | Exclude        |         |     |     |        |     |   |
| substance Misuse (incl. alcohol)                                               | 41%                             | 9%  | 5   | 28% | 50% | 48% | Exclude        |         |     |     |        |     |   |
| serious accidental injury                                                      | 40%                             | 12% | 5   | 25% | 36% | 62% | Exclude        |         |     |     |        |     |   |
| Community participation                                                        | 39%                             | 6%  | 5   | 35% | 36% | 48% | Exclude        |         |     |     |        |     |   |
| stability                                                                      | 38%                             | 4%  | 5   | 13% | 59% | 47% | Exclude        |         |     |     |        |     |   |
| Advocate involvement in discharge planning                                     | 37%                             | 12% | 5   | 24% | 45% | 45% | Exclude        |         |     |     |        |     |   |
| Professional/care team satisfaction with information provision at discharge    | 36%                             | 13% | 5   | 19% | 45% | 48% | Exclude        |         |     |     |        |     |   |
| Primary Care/Community service/Nongovernmental or Charity service satisfaction | 35%                             | 16% | 5   | 15% | 50% | 48% | Exclude        |         |     |     |        |     |   |
| Police intervention post discharge                                             | 34%                             | 16% | 5   | 35% | 32% | 35% | Exclude        |         |     |     |        |     |   |
| staff satisfaction with discharge                                              | 28%                             | 16% | 5   | 19% | 36% | 29% | Exclude        |         |     |     |        |     |   |
| Boredom                                                                        | 26%                             | 25% | 4   | 12% | 36% | 33% | Exclude        |         |     |     |        |     |   |
| Meaningful Activity (i.e. employment, studying, volunteering)                  | New outcome proposed in round 1 |     |     |     |     |     |                | Include | 77% | 73% | 83.33% | 80% | 6 |
| Resilience                                                                     | New outcome proposed in round 1 |     |     |     |     |     | Do not present |         |     |     |        |     |   |
| Dual harm (i.e. a person harms themselves and others)                          | New outcome proposed in round 1 |     |     |     |     |     |                | Exclude | 32% | 23% | 55.56% | 30% | 4 |



1  
2  
3  
4  
5  
6  
7  
8  
9  
10  
11  
12  
13  
14  
15  
16  
17  
18  
19  
20  
21  
22  
23  
24  
25  
26  
27  
28  
29  
30  
31  
32  
33  
34  
35  
36  
37  
38  
39  
40  
41  
42  
43  
44  
45  
46  
47

|                                                              |                                 |                |  |  |  |  |  |  |
|--------------------------------------------------------------|---------------------------------|----------------|--|--|--|--|--|--|
| Annual admissions                                            | New outcome proposed in round 1 | Do not present |  |  |  |  |  |  |
| Harm to others (violence, criminal or risk-taking behaviour) | New outcome proposed in round 1 | Do not present |  |  |  |  |  |  |
| Levels of patient confidentiality                            | New outcome proposed in round 1 | Do not present |  |  |  |  |  |  |
| Personal learning                                            | New outcome proposed in round 1 | Do not present |  |  |  |  |  |  |

For peer review only

**File 5: Proposed potential service user discharge experience PROM that includes items of most importance to stakeholders in addition to the core outcome set**

| Item                                                                 | Strongly Agree | Agree | Neither Agree nor Disagree | Disagree | Strongly Disagree |
|----------------------------------------------------------------------|----------------|-------|----------------------------|----------|-------------------|
| 1. I felt involved in my discharge planning                          |                |       |                            |          |                   |
| 2. I understood my discharge plan                                    |                |       |                            |          |                   |
| 3. I know how to access support in the community                     |                |       |                            |          |                   |
| 4. I was frequently involved in decisions about my care at discharge |                |       |                            |          |                   |
| 5. I was discharged to appropriate accommodation                     |                |       |                            |          |                   |
| 6. I was satisfied with the information provided to me at discharge  |                |       |                            |          |                   |

**File 6: Outcome Measure Recommendation Results**

## Methods

After the core outcome set was agreed in the consensus meeting, we invited all participants from the earlier stages of the project to recommend measures and time markers in a final online questionnaire. Participants were invited to participate if they had been involved in any of the previous online rounds. The invitation made it clear that the questionnaire is most relevant to researchers, but that other groups with an opinion or interest are welcome to contribute. This was due to the specific knowledge of instruments required to complete this round.

In this questionnaire participants were presented with the four core outcomes. For each core outcome they were presented with any measures used to assess that outcome in our systematic review studies [1] and any additional measures that had been recommended to the team during the process. Participants were asked to choose the one most appropriate, (don't know, other, new instrument, no instrument were also options). A second question also asked which time markers would be recommended, with options to select all applicable. These options were also developed based on time markers used in the systematic review [1].

## Results

Forty-three of the 93 invited participants responded (15 service users, 8 family members/carers, 23 researchers, 10 healthcare professionals, 3 end users of research), although as in previous rounds these were not distinct categories. Fifty-three percent of the respondents were researchers, this was expected as in the email we suggested that this stage may be more meaningful or of interest to this group, but as a team we chose not to exclude other groups with opinions on measurement instruments. Twenty-three percent of participants were international

researchers (from USA, Switzerland, Canada, and Australia). Table 4 shows the preliminary minimum measure recommendations and time markers, additional file 5 shows the results upon which the recommendations were based.

*Table 1: Summary of Measurement Recommendations*

| Core Outcome           | Instrument/Measure                          | Time Marker                 |
|------------------------|---------------------------------------------|-----------------------------|
| Readmission            | Retrospective review of administrative data | Within 28 days of discharge |
| Suicide Completed      | Retrospective review of administrative data | Within 28 days of discharge |
| Psychological Distress | Kessler Psychological Distress (K10)        | One month post-discharge    |
| Quality of Life        | ReQoL-10                                    | One month post-discharge    |

### 1. Readmission

A minimum recommendation of using retrospective review of administrative data for readmissions within a defined time period, the most agreed was 28 days. Participants indicated that routine data collection might cover slightly different time periods. Twenty-six of the 43 participants recommended a measure of around a month (1 month, 30 days or 28 days) with 28 days being this most popular. However, they also advise that this should be supplemented either by cross-checking with service-users, case managers or carers, where possible to improve quality of data. Those looking for more comprehensive data may also like to record 7 days, 3 months and 6 months as these were also popular recommendations.

### 2. Quality of Life

The participants recommended that researchers use the Recovering Quality of Life (ReQoL-10) at one month post-discharge [35]. This was the most recommended instrument by the group. However, many participants also voted for ReQoL 20, a large proportion of the group suggested this outcome. As this is a quality of life measure specific to mental health recovery they felt this is most appropriate. The one month time marker is in-keeping with the other COS time frames, making a more comprehensive and accessible core outcome set. Those using within-participant measures of quality of life may like to also measure a pre-discharge baseline. Researchers looking for more thorough assessment of quality of life may like to also measure at 7 days post-discharge and 3 months, as these were also highly recommended time markers or use the ReQoL 20 and report both scores for comparability.

### 3. Suicide Completed

The participants recommended retrospective review of administrative data, for suicide completed within 28 days of discharge. Retrospective review is in line with other outcomes and was marginally the highest suggestion. We chose within 28 days for consistency with readmission data. Researchers looking for more comprehensive data may want to use 7 days and 3 months as these were highly recommended also. They may also want to cross-check this information against other sources (carers/case managers) to ensure it is correct and

reported, particularly as participants mentioned the impact of incorrect coroner's reports on such data.

#### 4. Psychological Distress

The participants recommended Kessler Psychological Distress (K10) one month post-discharge [36]. For consistency with other outcomes we recommend measure at one month. Seven days and 3 months are also highly recommended, so we would recommend these for research that is more robust. Although there were very few votes for instruments for psychological distress and qualitative comments revealed that participants felt this is not measurable. The same amount of people who voted for K10 also voted for interviews or other measures and a similar amount recommended the development of a new measure, CORE-10 was similarly close [37]. Whilst we make this recommendation, we also suggest that future researchers may look to develop something specific for Psychological Distress in this core outcome set. Interviews would not effectively facilitate the between study comparison, the key purpose of a COS.

#### Outcome 1: Readmission

| Measure                                                                    | Number of votes | Important comments                                                                                                                                                                         |
|----------------------------------------------------------------------------|-----------------|--------------------------------------------------------------------------------------------------------------------------------------------------------------------------------------------|
| Interviews with SUs                                                        | 12              | <ul style="list-style-type: none"> <li>In some countries... there is no easily accessible data on readmission rates... in our experience self-reported in the most reliable way</li> </ul> |
| Retrospective review of administrative data                                | 13              | <ul style="list-style-type: none"> <li>Might not show people who need admission but don't because there's no bed</li> </ul>                                                                |
| Extracted from case-managers notes and cross-checked with hospital records | 10              | <ul style="list-style-type: none"> <li>Might be easier to gather administrative data, but worth cross-checking to improve quality of information</li> </ul>                                |
| Self-reported questionnaire                                                | 1               |                                                                                                                                                                                            |
| Other- carer interview                                                     | 2               |                                                                                                                                                                                            |
| Total                                                                      | 38              |                                                                                                                                                                                            |

**Conclusion:** A minimum recommendation of using retrospective review of administrative data. This will allow for various studies with diverse time and financial limits to use the COS. However, we also advise that this should be supplemented either by cross-checking with service-users, case managers or carers, where possible to improve quality of data.

#### Time Markers

| Time marker          | Number of Votes |
|----------------------|-----------------|
| Within 2 days        | 3               |
| Within 3 days        | 2               |
| Within 7 days        | 17              |
| Within 28 days       | 12              |
| Within 30 days       | 7               |
| Within 1 month       | 7               |
| Within 6 weeks       | 4               |
| Within 12 weeks      | 7               |
| Within 3 months      | 11              |
| Within 6 months      | 14              |
| Other (1yr and 3yrs) | 1               |

|                 |    |
|-----------------|----|
| Around 3 days   | 5  |
| Around a month  | 26 |
| Around 3 months | 18 |

**Conclusion:** The minimum recommendation to record readmission within 28 days. 26 of the 43 participants recommended a measure of around a month (1 month, 30 days or 28 days) with 28 being this most popular. Those looking for higher quality or more comprehensive data may also like to record 7 days, 3 months and 6 months as these were also popular recommendations.

## Outcome 2: Quality of Life

| Instrument                                          | Number of votes | Comments                                                                                                                                                                                                                                   |
|-----------------------------------------------------|-----------------|--------------------------------------------------------------------------------------------------------------------------------------------------------------------------------------------------------------------------------------------|
| ReQoL- 10                                           | 9               | 'I think ReQoL would be best for patients in MH services as I understand it was validated for CMHT patients but if someone didn't have contact with MH services before and isn't under a CMHT afterwards another measure might be better.' |
| ReQoL- 20                                           | 3               |                                                                                                                                                                                                                                            |
| Quality of Life Brief Version (Lehman)              | 2               |                                                                                                                                                                                                                                            |
| WHO Quality of Life Scale                           | 5               |                                                                                                                                                                                                                                            |
| Manchester Short Assessment Quality of Life (MANSA) | 1               |                                                                                                                                                                                                                                            |
| Satisfaction with Life Scale (SWLS)                 | 1               |                                                                                                                                                                                                                                            |
| SF12                                                | 2               |                                                                                                                                                                                                                                            |
| EQ5D                                                | 0               |                                                                                                                                                                                                                                            |
| AQoL-8D                                             | 0               |                                                                                                                                                                                                                                            |
| Other (ICECAP)                                      | 1               |                                                                                                                                                                                                                                            |
| Develop a new tool                                  | 2               |                                                                                                                                                                                                                                            |
| No instrument (interviews etc. instead)             | 7               | I think the use of tools should be complemented with interviews with service users and carers.                                                                                                                                             |
| Total                                               | 33              |                                                                                                                                                                                                                                            |
| ReQoL combined (10+20)                              | 12              |                                                                                                                                                                                                                                            |

**Conclusion:** We recommend that researchers use ReQoL-10. This was the most voted for instrument. If we also combine the scores with those who voted for ReQoL 20, a large proportion of the group suggested this outcome. As this is a quality of life measure specific to mental health recovery we feel this is most appropriate.

## Time markers

| Time Point                                     | Number of votes |
|------------------------------------------------|-----------------|
| Within 2 days                                  | 3               |
| Within 3 days                                  | 2               |
| Within 7 days                                  | 16              |
| Within 28 days                                 | 11              |
| Within 30 days                                 | 6               |
| Within 1 month                                 | 9               |
| Within 6 weeks                                 | 3               |
| Within 12 weeks                                | 5               |
| Within 3 months                                | 21              |
| Within 6 months                                | 11              |
| Other (within 9 months, 12 months and 3 years) | 2               |
| Pre-discharge                                  | 9               |
| Around 3 days                                  | 5               |
| Around 1 month                                 | 26              |
| Around 3 months                                | 26              |

**Conclusion:** We recommend a minimum measure of QoL at one month post-discharge in RCTs. This is in keeping with the readmission time frames, making a more comprehensive and accessible core outcome set. Those using within-participant measures of quality of life may like to

also measure a pre-discharge baseline. Those looking for more thorough assessment of QoL may like to also measure at 7 days post-discharge and 3 months, as these were also highly recommended time markers.

### Core Outcome 3: Suicide completed

| Measure                                                              | Number of votes |
|----------------------------------------------------------------------|-----------------|
| Retrospective review of administrative data                          | 18              |
| Extracted from case managers and cross-checked with hospital records | 17              |
| Extracted from clinical case notes                                   | 14              |
| Other                                                                |                 |
| Extracted from serious incident reporting                            |                 |
| From family and friends                                              | 4               |
| Total                                                                | 53              |

**Conclusion:** Retrospective review of administrative data. To keep in line with other outcomes and was marginally highest measure.

| Time Marker     | Number of votes |
|-----------------|-----------------|
| Within 2 days   | 2               |
| Within 3 days   | 2               |
| Within 7 days   | 20              |
| Within 28 days  | 12              |
| Within 30 days  | 4               |
| Within 1 month  | 9               |
| Within 6 weeks  | 0               |
| Within 12 weeks | 4               |
| Within 3 months | 14              |
| Within 6 months | 13              |
| Other           | 2               |
|                 |                 |
| Around 3 days   | 4               |
| Around 1 month  | 25              |
| Around 3 months | 18              |

**Conclusion.** Within 28 days for consistency with other outcomes. Other researchers may want to use 7 days and 3 months as these were highly recommended also.

### Outcome 4: Psychological Distress

| Instrument                                                    | Number of votes |
|---------------------------------------------------------------|-----------------|
| Kessler Psychological Distress (K10)                          | 6               |
| CORE-10                                                       | 5               |
| Brief Psychiatric Rating Scale (BPRS)                         | 3               |
| Brief Symptom Inventory (BSI)                                 | 1               |
| The positive and negative symptom scale                       | 1               |
| The Discharge List (DL) – 20 item scale                       | 2               |
| Clinical Global Impression to Assess illness severity         | 0               |
| ASI (Psychiatric problem subscale)                            | 0               |
| PSYRAT (Psychological Distress subscale)                      | 1               |
| Develop a new self-assessment tool for psychological distress | 5               |
| Other                                                         | 1               |
| No instrument (interview or other method instead)             | 6               |
| Total                                                         | 31              |

**Conclusion:** We recommend Kessler Psychological Distress (K10). Although there were very few votes for measures. The same amount of people who voted for K10 also voted for interviews or other measures and a similar amount recommended the development of a new measure,

CORE-10 was similarly close. Whilst we make this recommendation, we also suggest that future researchers may look to develop something specific for this core outcome set. Interviews would not allow for easy comparison of scores so would not be relevant for a core outcome set.

### Time Markers

| Time Marker                           | Number of votes |
|---------------------------------------|-----------------|
| Within 2 days                         | 2               |
| Within 3 days                         | 4               |
| Within 7 days                         | 22              |
| Within 28 days                        | 8               |
| Within 30 days                        | 4               |
| Within 1 month                        | 14              |
| Within 6 weeks                        | 3               |
| Within 12 weeks                       | 4               |
| Within 3 months                       | 15              |
| Within 6 months                       | 14              |
| Other                                 | 3               |
| Pre-discharge baseline measure at ... | 5               |
|                                       |                 |
| Around 3 days                         | 6               |
| Around 1 month                        | 26              |
| Around 3 months                       | 19              |

**Conclusion:** The minimum recommendation is one month post-discharge. For consistency with other outcomes we recommend measure at one month. 7 days and 3 months are also highly recommended, so we would recommend these for more thorough research.



1  
2  
3  
4  
5  
6  
7  
8  
9  
10  
11  
12  
13  
14  
15  
16  
17  
18  
19  
20  
21  
22  
23  
24  
25  
26  
27  
28  
29  
30  
31  
32  
33  
34  
35  
36  
37  
38  
39  
40  
41  
42  
43  
44  
45  
46  
47  
48  
49  
50  
51  
52  
53  
54  
55  
56  
57  
58  
59  
60

For peer review only

1  
2  
3  
4  
5  
6  
7  
8  
9  
10  
11  
12  
13  
14  
15  
16  
17  
18  
19  
20  
21  
22  
23  
24  
25  
26  
27  
28  
29  
30  
31  
32  
33  
34  
35  
36  
37  
38  
39  
40  
41  
42  
43  
44  
45  
46  
47  
48  
49  
50  
51  
52  
53  
54  
55  
56  
57  
58  
59  
60

For peer review only

# BMJ Open

## Developing a Core Outcome Set for Interventions to Improve Discharge from Mental Health Inpatient Services: A Survey, Delphi and Consensus Meeting with Key Stakeholder Groups.

|                                 |                                                                                                                                                                                                                                                         |
|---------------------------------|---------------------------------------------------------------------------------------------------------------------------------------------------------------------------------------------------------------------------------------------------------|
| Journal:                        | <i>BMJ Open</i>                                                                                                                                                                                                                                         |
| Manuscript ID                   | bmjopen-2019-034215.R2                                                                                                                                                                                                                                  |
| Article Type:                   | Original research                                                                                                                                                                                                                                       |
| Date Submitted by the Author:   | 25-Feb-2020                                                                                                                                                                                                                                             |
| Complete List of Authors:       | Tyler, Natasha; The University of Manchester, NIHR Greater Manchester Patient Safety Translational Research Centre<br>Wright, Nicola; University of Nottingham<br>Grundy, Andrew; University of Nottingham<br>Waring, Justin ; University of Birmingham |
| <b>Primary Subject Heading</b>: | Mental health                                                                                                                                                                                                                                           |
| Secondary Subject Heading:      | Health services research                                                                                                                                                                                                                                |
| Keywords:                       | MENTAL HEALTH, Core Outcome Set, Discharge, Care Transitions, Acute Adult Mental Health Services                                                                                                                                                        |
|                                 |                                                                                                                                                                                                                                                         |

SCHOLARONE™  
Manuscripts



I, the Submitting Author has the right to grant and does grant on behalf of all authors of the Work (as defined in the below author licence), an exclusive licence and/or a non-exclusive licence for contributions from authors who are: i) UK Crown employees; ii) where BMJ has agreed a CC-BY licence shall apply, and/or iii) in accordance with the terms applicable for US Federal Government officers or employees acting as part of their official duties; on a worldwide, perpetual, irrevocable, royalty-free basis to BMJ Publishing Group Ltd ("BMJ") its licensees and where the relevant Journal is co-owned by BMJ to the co-owners of the Journal, to publish the Work in this journal and any other BMJ products and to exploit all rights, as set out in our [licence](#).

The Submitting Author accepts and understands that any supply made under these terms is made by BMJ to the Submitting Author unless you are acting as an employee on behalf of your employer or a postgraduate student of an affiliated institution which is paying any applicable article publishing charge ("APC") for Open Access articles. Where the Submitting Author wishes to make the Work available on an Open Access basis (and intends to pay the relevant APC), the terms of reuse of such Open Access shall be governed by a Creative Commons licence – details of these licences and which [Creative Commons](#) licence will apply to this Work are set out in our licence referred to above.

Other than as permitted in any relevant BMJ Author's Self Archiving Policies, I confirm this Work has not been accepted for publication elsewhere, is not being considered for publication elsewhere and does not duplicate material already published. I confirm all authors consent to publication of this Work and authorise the granting of this licence.

1  
2  
3 Title: Developing a Core Outcome Set for Interventions to Improve Discharge from  
4 Mental Health Inpatient Services: A Survey, Delphi and Consensus Meeting with Key  
5 Stakeholder Groups.  
6  
7  
8

9  
10 Authors:

11 Corresponding Author: Natasha Tyler (Greater Manchester Patient Safety Translational  
12 Research Centre, University of Manchester, Manchester, UK,  
13 [Natasha.tyler@manchester.ac.uk](mailto:Natasha.tyler@manchester.ac.uk), 0161 275 7620)  
14

15  
16 Nicola Wright (University of Nottingham, Nottingham, UK)  
17

18 Andrew Grundy (University of Nottingham, Nottingham, UK)  
19

20 Justin Waring (Health Services Management Centre, University of Birmingham,  
21 Birmingham, UK)  
22  
23  
24  
25  
26  
27  
28  
29  
30  
31  
32  
33  
34  
35  
36  
37  
38  
39  
40  
41  
42  
43  
44  
45  
46  
47  
48  
49  
50  
51  
52  
53  
54  
55  
56  
57  
58  
59  
60

## Abstract

### Objective

To develop a core set of outcomes to be used in all future studies into discharge from acute mental health services to increase homogeneity of outcome reporting.

### Design

We used a cross-sectional online survey with qualitative responses to derive a comprehensive list of outcomes, followed by two online Delphi rounds and a face-to-face consensus meeting.

### Setting

The setting the core outcome set applies to is acute adult mental health.

### Participants

Participants were recruited from five stakeholder groups: service-users, families and carers, researchers, healthcare professionals and policy makers.

### Interventions

The core outcome set is intended for all interventions that aim to improve discharge from acute mental health services to the community.

### Results

Ninety-three participants in total completed the questionnaire, 69 in Delphi round 1, and 68 in round 2, with relatively even representation of groups. Eleven participants attended the consensus meeting. Service-users, healthcare professionals, researchers, carers/families and end-users of research agreed on a four-item core outcome set: Readmission, Suicide completed, Service-user reported psychological distress and Quality of life.

### Conclusion

Implementation of the core outcome set in future trials research will provide a framework to achieve standardisation, facilitate selection of outcome measures, allow between-study comparisons, and ultimately enhance the relevance of trial or research findings to healthcare professionals, researchers, policy makers and service users.

## Article Summary

### Strengths and Limitations

- This is the first initiative to reduce heterogeneity in outcome reporting for interventions that improve discharge from acute mental health services.
- A high level of consensus amongst 69 service users, families/carers, healthcare professionals, researchers and policy makers was achieved.
- COS-STAR reporting guidelines were followed.

- Although the stakeholder group included international researchers, service users and healthcare professionals were recruited only from the UK.
- Not all of the participants who contributed online attended the face-to-face meeting, whereby the core outcome set was reduced considerably.

## Funding

This work was funded by the National Institute for Health Research (NIHR) Greater Manchester Patient Safety Translational Research Centre (NIHR Greater Manchester PSTRC). The views expressed are those of the author(s) and not necessarily those of the NIHR or the Department of Health and Social Care.

## Competing Interests

The authors report no competing interests.

## Key Words

- Acute Adult Mental Health Services
- Core Outcome Set
- Mental Health
- Discharge
- Care Transitions

## Background

Care transitions (when patient care is transferred from one team, department or organisation to another) are widely recognised as a vulnerable and high-risk stage in the care pathway [1–3]. Safety issues may be intensified in acute mental health services, where care transitions are described as chaotic [3]. For example, suicide risk increases post-discharge from acute mental health services [4,5]. A growing body of research describes these risks either directly in terms of identified ‘safety’ events or indirectly in terms of broader ‘problems’, including for example treatment non-adherence, inappropriate readmissions, increased risk of self-injury or suicide attempts [3,6–8].

Internationally, researchers have attempted to find solutions to the problems or threats to safety associated with discharge from acute mental health services by developing interventions that aim to improve different aspects of discharge planning, transitions, continuity of care, and follow-up care [9]. Some interventions aim to improve discharge by introducing new roles, for example a discharge co-ordinator [10]. Others focus on increasing contact between clinical staff and service users, for example using letters or telephone follow-up [11–13]. Many ‘successful’ interventions in reducing readmission, bridged the boundaries between ward and community by providing types of ward-based care in the community [14,15] or where community teams lead discharge planning on the wards [16].



1  
2  
3  
4  
5  
6  
7  
8  
9  
10  
11  
12  
13  
14  
15  
16  
17  
18  
19  
20  
21  
22  
23  
24  
25  
26  
27  
28  
29  
30  
31  
32  
33  
34  
35  
36  
37  
38  
39  
40  
41  
42  
43  
44  
45  
46  
47  
48  
49  
50  
51  
52  
53  
54  
55  
56  
57  
58  
59  
60

There has been little attempt to compare these diverse interventions. Existing reviews have included either a narrow range of studies addressing a single outcome or focus on a specific time frame in an attempt to synthesise results [8,17]. Comparison and meta-synthesis of effectiveness of interventions has reported limited success. Across the papers included in our systematic review and those by other researchers [1,18], variation in the outcomes reported is substantial. This limits between study comparability and delays advancement in evidence collection. Furthermore, outcomes in these trials were not necessarily representative of the measures that service users would consider important at discharge. Both matters can potentially be addressed with the development of a ‘core outcome set’, defined as “an agreed, standardised collection of outcomes which should be measured and reported, as a minimum, in all trials for a specific clinical area” [19].

The development and use of ‘core outcome sets’ has been endorsed as a means to reduce outcome heterogeneity in research, and to increase the relevance of research through the involvement of key stakeholders in its development [20]. There is an emerging body of literature highlighting the difficulties of defining and assessing outcomes in a mental health population [21]. There is also evidence of a lack of agreement amongst key groups about what should be measured and in what capacity and an evident tension between the population health perspective and provision of individualised care [17,21]. One aforementioned previous review identified the need for consensus on outcome definitions in discharge planning interventions [17]. Similarly a recent Kings Fund report suggested broader consensus upon the outcomes that matter is imperative for advancement [21]. Therefore, generating agreement amongst healthcare professionals, service users, policy makers and researchers is a difficult but imperative task, to enable the useful direction of healthcare services [21]. The difficulties are further exemplified when applied to care transitions, a multi-agency, multi-stage, complex period of the care pathway [3,22]. This paper outlines the development of a core outcome set for research of interventions to improve discharge from acute mental health wards to the community.

The objective of this study was to obtain international consensus on a set of core outcome measures to be reported in all interventions intended to improve discharge from mental health inpatient services.

## Methods

### Study overview

The scope of the core outcome set was defined according to the criteria recommended by Core Outcome Measures in Effectiveness Trials (COMET) [23]. The study was prospectively registered with the COMET initiative (1276). The health condition was functional conditions (mental disorders other than dementia, and includes severe mental illness such as schizophrenia). The population was adults aged 18-65, the intervention was any interventions that aimed to improve discharge from an acute mental health setting to the community. The core outcome set was developed using four stages, including service users and healthcare professionals at each stage: (1) a long list of outcomes was generated through a systematic review [1] and qualitative survey; (2) the resulting long outcome list was used to populate an online Delphi process (2 rounds); and (3) the results of the Delphi survey were appraised at a consensus meeting and the final core outcome set was established. The process included a series of core research team meetings at every stage, the team comprised of a

1  
2  
3 researcher and core outcome set developer, an associate professor in mental health and  
4 mental health nurse, a researcher and expert by lived experience of acute services and an  
5 expert in patient safety. Participants did not fit into distinct homogeneous groups, for  
6 example mental health professionals were sometimes also past service users or family  
7 members of service users. Similarly researchers had personal experience of inpatient mental  
8 health services. Therefore, wherever possible we considered the group as whole and tried not  
9 to compare categories.  
10

## 11 12 **Participants**

13  
14  
15 Participants were recruited in a number of ways in December 2018 to January 2019.  
16 Academic researchers were recruited if their research had been included in our systematic  
17 review or if they were known researchers in the field identified by the team. End-users of  
18 research (policy makers, NGOs, NHS management, commissioners, advocates etc.) were  
19 recruited via searching for publicly available contact details or using our team's professional  
20 networks or social media. Service users and healthcare professionals were recruited through  
21 social media. Twitter was nominated as the primary platform for recruitment due to its ability  
22 to reach into the specific communities of interest we required: mental health professionals,  
23 service users and families/carers. Using social media has been reported as a cost-effective and  
24 efficient way to recruit those from potentially stigmatised groups [24]. Further, the peer  
25 network structures of social media platforms enable users to recruit other users through  
26 sharing links within their networks.  
27  
28

29  
30 The same participant group was used throughout the iterative research process, therefore, in  
31 order to reduce attrition, those who dropped out in early rounds were invited to re-join the  
32 panel in subsequent rounds. Participants were recruited for the consensus meeting during the  
33 Delphi, UK participants were asked to indicate whether they would be interested in a face-to-  
34 face meeting. We invited a random sample of interested participants to attend, that ensured  
35 representative of the stakeholder groups. If a participant declined the invite a similarly  
36 matched participant was invited from the Delphi panel principally, or the teams wider  
37 network.  
38  
39

## 40 41 **Stage 1: Gathering information**

42  
43  
44 In addition to the outcomes extracted from the systematic review [1], outcomes of importance  
45 to each stakeholder group were identified through qualitative surveys. For the main body of  
46 the questionnaire, we used open questions that were developed to elicit potential additional  
47 outcomes. The questions were loosely modelled on questions developed for a large scale  
48 outcome generation study for a depression core outcome set which were developed with  
49 service users and healthcare professionals [25]. The question format was mirrored, but  
50 adapted for a mental health discharge theme. The views of a PPI (patient and public  
51 involvement), group sought to confirm appropriateness of questions and instructions (n=5).  
52  
53

54  
55 After reading a participant information sheet and giving informed consent (by ticking a box),  
56 participants selected their stakeholder group (s) and watched a video that describes core  
57 outcome sets to non-experts. All participants were then presented with four open-ended  
58 questions relating to safe and effective discharge (see additional file 1). Participants were  
59 later presented with 3-5 questions specifically developed for their stakeholder group,  
60 additional file 1 outlines all of the questions. If a participant were a member of more than one

1  
2  
3 group, they answered questions relevant to multiple groups. Participants also answered a  
4 number of demographic questions: years of experience, country of residence, area of UK (if  
5 applicable), gender, age and email address for follow-up. The round was open for 6 weeks  
6 beginning December 10<sup>th</sup> 2018.  
7  
8  
9

10 Qualitative data was coded to identify outcomes and thematically synthesised [26]. This  
11 involved line-by-line coding of text and development of descriptive themes, the final stage  
12 involved generating analytical themes, which were converted into potential outcomes where  
13 applicable. Outcomes were identified both indirectly, by extrapolating from service users'  
14 experiences (e.g. What would make discharge from an acute mental health ward safe in your  
15 opinion?), and directly, by asking specifically about outcomes (e.g. Can you think of any  
16 important outcomes to measure in research assessing discharge interventions?).  
17  
18

19 Outcomes from the systematic review [1] and qualitative surveys were combined to generate  
20 a long list of outcomes. This list, along with relevant quotes from the qualitative data, was  
21 discussed by the core research team in a structured meeting. Each outcome was considered in  
22 turn and each member had the opportunity to present arguments for or against inclusion. For  
23 each outcome, the group decided whether it should be a stand-alone outcome, combined with  
24 other codes of a similar thematic nature or removed from the process due to being of limited  
25 importance for a core outcome set. For example, we agreed to merge closely related items  
26 (e.g. *family relations* and *quality of interpersonal relationships*) and to exclude outcomes  
27 considered to be of limited importance (e.g., specific to a specialised area of care: *Autistic*  
28 *life*; or intervention *Antipsychotic Politherapy*). Unless there was a unanimous decision to  
29 merge or remove an outcome, it remained as a stand-alone outcome. The group decisions  
30 about each outcome are documented in additional file 2.  
31  
32  
33  
34

## 35 **Stage 2: Delphi survey**

36  
37 The Delphi technique is a research method aimed at generating consensus. It solicits opinions  
38 from stakeholders groups in an iterative process of answering questions. After each round the  
39 responses are summarised and redistributed for discussion in the next round. We chose to  
40 have two rounds of Delphi in this study. The final outcome list that was decided upon after  
41 the group discussion in stage 1 was used to develop the first Delphi questionnaire. Any  
42 outcomes without consensus after the first round, were re-presented in round 2. The outcome  
43 list and instructions for the questionnaires were reviewed for face validity, understanding, and  
44 acceptability by a PPI group (n=5) and modified according to feedback.  
45  
46  
47

48 A link to the survey was sent via email. Each round remained open for 14 days and  
49 participants received two follow-up reminder emails. Round 1 was open from late February  
50 2019 to early March 2019, round 2 was late March 2019 to early April 2019. We ran the  
51 Delphi survey manually using Qualtrics: a secure online hosting platform [27]. In each  
52 round, participants were asked whether the items should become part of a core outcome set.  
53 A 7-point Likert scale was used, described as: Strongly Agree (7), Agree (6), Slightly Agree  
54 (5), Neither Agree nor disagree (4), Slightly Disagree (3), Disagree (2), Strongly Disagree  
55 (1). There is no definitive research indicating the optimal number of points to have on a  
56 Likert scale but scales between 5 and 9 points have been suggested as having the best  
57 reliability, so we chose a 7 point scale [28]. There was a free-text comments box and  
58 participants were encouraged to provide comments that would be fed-back anonymously to  
59  
60

1  
2  
3 the group. Participants could suggest additional outcomes at the end of round 1, which were  
4 reviewed by the core research team. Any outcome not already represented was added to  
5 round 2.  
6

7  
8 In round 2 median group scores for each outcome and anonymous comments for and against  
9 from the previous round were presented and participants were asked to reflect on the  
10 information presented and score each outcome again. The percentage of participant  
11 agreement with each outcome on a scale of 1–7 was calculated from the scores obtained  
12 during round 1 and again in round 2.  
13

14  
15 Literature suggests that consensus levels should be set a priori at a minimum of 70 percent  
16 [23,29]. We unanimously chose a 75% consensus level, slightly higher than the minimum to  
17 increase sensitivity, but to still allow for a varied pool of applicable outcomes given the  
18 tension in the literature around disagreement between service-user, health professional and  
19 policy-makers opinions of mental health outcomes [21]. Consensus criteria were defined a  
20 priori: outcomes scored as Agree or Strongly Agree (6-7) by 75% or more of the group  
21 reached consensus for inclusion and were included in the provisional core outcome set.  
22 Outcomes scored as Disagree or Strongly Disagree (1-2) by 75% or more were defined as  
23 having reached consensus for exclusion and were excluded. Outcomes not fulfilling criteria  
24 for consensus inclusion or exclusion were defined as not having reached consensus and were  
25 re-presented in round 2.  
26  
27

28  
29 As no outcomes met the original criteria for having reached consensus for exclusion after  
30 round 1, it was agreed by the research team to redefine the criteria for having reached  
31 consensus for exclusion if 50% or less of participants scored the item as Strongly Agree or  
32 Agree (6-7). Reducing exclusion criteria after round 1 has been used effectively in past core  
33 outcome set research [30].  
34  
35

### 36 **Stage 3: Consensus meeting**

37  
38 The results of the Delphi survey were presented at a consensus meeting. The main goal of the  
39 consensus meeting was to decide which items will be included in the final core outcome set.  
40 This was chaired by an independent researcher with expertise in consensus methodology, and  
41 who was not a member of the core research team. Participants were sampled to achieve a  
42 balanced representation of service users, health-care professionals, researchers and end-users  
43 of research. We aimed to have a small representative group of between 9 and 12 to enable  
44 meaningful small group discussions, similar to consensus meetings chaired by the facilitator  
45 in other fields [30,31]. International participation was restricted because of budgetary  
46 constraints.  
47  
48

49  
50 The format of the consensus meeting comprised of a) a short overview of the study and b) a  
51 summary of the Delphi results sorted by stakeholder group, beginning with the outcomes that  
52 met consensus [32]. Outcomes identified in round 1 and 2 of the Delphi as having reached  
53 consensus for inclusion were presented first. Participants were asked if there were any  
54 fundamental reasons why these should not be included in the core outcome set. Divergent  
55 views were actively sought and the chair ensured everyone had opportunity to participate in  
56 discussions before voting commenced. Outcomes from the preliminary core outcome set were  
57 discussed in terms of feasibility and voted upon. Voting was conducted anonymously using  
58 cards in an envelope with bivariate response options (include/exclude). Voting and  
59  
60

1  
2  
3 consensus criteria followed the same format as in the Delphi (75% for inclusion). Results  
4 were presented after the voting of all outcomes had finished. Outcomes deemed to be having  
5 reached consensus for exclusion or with no consensus in the Delphi were reviewed and  
6 participants were asked if there were any fundamental reasons why these should be included  
7 in the core outcome set. Individual outcomes were discussed only if proposed as being  
8 important by a meeting participant. Outcomes meeting criteria for consensus were included in  
9 the core outcome set; all other items excluded. The meeting finished with the presentation  
10 and a final review and discussion of the core outcome set.  
11  
12

### 13 **Patient and Public Involvement**

14  
15  
16 Five patient representatives worked with researchers to develop the online questionnaires.  
17 Patients were represented alongside professionals and researchers in the consensus panel.  
18 One member of the research team (and co-author) is an expert by lived experience and was  
19 involved in all design and analysis decisions.  
20

### 21 **Ethics and registration**

22  
23 Our findings are reported in line with the Core Outcome Set-Standards for Reporting (COS-  
24 STAR) guidance [32]. The study was prospectively registered with the COMET initiative  
25 (1276). The study was approved by the University of Nottingham Business School ethics  
26 committee and all participants gave informed consent  
27  
28  
29  
30

## 31 **Results**

### 32 **Stage 1: Information gathering**

33  
34  
35 Our systematic review has been described in detail elsewhere [1]. In summary 69 outcome  
36 categories were identified from 45 studies. Ninety-three participants in total, from 12  
37 countries completed the information gathering questionnaire. However, as aforementioned,  
38 many identified with more than one stakeholder group, therefore we do not have absolute  
39 homogenous stakeholder group numbers, 27 identified as service users, 17 family/carers, 39  
40 health-care professionals, 15 end-user of research and 37 researchers. Additional file 3  
41 presents participants demographics. Qualitative questionnaires revealed an additional 45  
42 outcomes that were not identified in the literature (for example, outcomes concerning  
43 involvement in discharge planning, see additional file 2). After discussion within the research  
44 team, 82 standardised outcome terms were taken forward into the Delphi process; 19  
45 outcomes were combined/collapsed and 13 were removed, see additional file 2.  
46  
47  
48

### 49 **Stage 2: Delphi process**

50  
51 Sixty-nine participants completed round 1 of the Delphi (22 service users, families and  
52 carers, 26 researchers and 21 healthcare professionals and decision makers) and 68  
53 participants completed round 2 (30 researchers, 18 service users and families and 20  
54 healthcare professionals and decision makers). Whilst 5 participants dropped out after round  
55 1, 4 participants joined the panel in round 2 (these individuals participated the qualitative  
56 questionnaire but not round 1). There was a 1.4% attrition between round 1 and 2 of the  
57 Delphi. Seven additional outcomes were proposed by participants during round 1, of which  
58  
59  
60



two were added into round 2 after a core team discussion. The full list of Delphi items is available in additional file 4.

After round 1, 14 outcomes met the criteria for consensus inclusion (75% or more agreed/strongly agree with that outcome, see table 1). Twenty outcomes met the revised

|                                                                                                                      | Percentage agreement | Percentage Disagreement | Median | Researchers | Service users and families | HCPs and DMs |
|----------------------------------------------------------------------------------------------------------------------|----------------------|-------------------------|--------|-------------|----------------------------|--------------|
| Service user involvement in discharge planning (inc. feeling listened to)                                            | 87%                  | 4%                      | 7      | 65%         | 100%                       | 95%          |
| Functioning (health, social, etc.)                                                                                   | 83%                  | 3%                      | 6      | 69%         | 100%                       | 81%          |
| Mental health and illness (symptom/psychological distress)                                                           | 83%                  | 3%                      | 6      | 73%         | 91%                        | 86%          |
| Personal Recovery                                                                                                    | 82%                  | 1%                      | 6      | 75%         | 86%                        | 86%          |
| Service user understanding of discharge plan                                                                         | 81%                  | 3%                      | 6      | 65%         | 91%                        | 86%          |
| Quality of life                                                                                                      | 81%                  | 1%                      | 6.5    | 65%         | 90%                        | 86%          |
| Suicide Completed                                                                                                    | 80%                  | 4%                      | 7      | 80%         | 90%                        | 68%          |
| Readmission                                                                                                          | 80%                  | 6%                      | 6      | 77%         | 77%                        | 86%          |
| Service user involvement in decision making (shared decision making)                                                 | 77%                  | 4%                      | 7      | 50%         | 95%                        | 86%          |
| Service user satisfaction with information provision at discharge (e.g. regarding medication, risk, crisis planning) | 77%                  | 6%                      | 6      | 65%         | 86%                        | 81%          |

criteria for having reached consensus for exclusion (50% or less of participants agreed/strongly agreed with that outcome). Forty-eight outcomes did not meet consensus criteria for inclusion or exclusion and were re-presented to the group in round 2. Therefore, 50 outcomes were presented in round 2, only one outcome met the criteria for consensus after this round: meaningful activity. No outcomes met criteria for exclusion and 49 did not meet consensus. Additional file 4 shows consensus levels for each outcome in each round.

*Table 1: The Preliminary Core Outcome Set at the end of the online Delphi.*

|                                                                                  |     |    |   |     |     |     |
|----------------------------------------------------------------------------------|-----|----|---|-----|-----|-----|
| Service user knowledge of how to access community support (i.e. in an emergency) | 77% | 3% | 6 | 58% | 91% | 86% |
| Recurrence (i.e. relapse)                                                        | 75% | 1% | 6 | 58% | 91% | 76% |
| Suicide Attempted                                                                | 75% | 4% | 6 | 62% | 86% | 81% |
| Discharge to appropriate accommodation                                           | 75% | 3% | 6 | 69% | 91% | 67% |
| Meaningful Activity (included in Round 2)                                        |     |    |   | 73% | 80% | 79% |

### Stage 3: Consensus Meeting

Eleven participants attended the consensus meeting, as in previous rounds these categories were not exclusive, six participants were researchers, three identified as service users, three as healthcare professionals and three end-users of research, see table 2. Table 3 shows the quantitative results of the meeting.

The preliminary 15-item core outcome set was considered individually and discussions indicated that many of the outcomes were elements of an ideal discharge, and process outcomes/variables, but probably not measurable outcomes that should be included in a core outcome set. After these discussions and independent and anonymous voting, five items no longer met consensus criteria for inclusion. First, 'service user involvement' in discharge planning, and the associated items 'Service user understanding of discharge plan', 'Service user involvement in decision making', 'Service user satisfaction with information provision at discharge'; and 'Service user knowledge of how to access community support'. There was a discussion that these are very important elements of a successful discharge, but not core outcomes due to issues surrounding validity and meaning.

'Mental health and illness' was initially close to consensus with 73% consensus to include, however those that chose to exclude found it to be too vague, and articulated that they were most interested in measuring acute psychological distress, rather than mental health and illness. The service user representatives in the group interpreted "recovery" to mean a complete amelioration of symptoms and even when in "recovery" individuals described continuing to experience distress and difficulties with their mental health. We chose to therefore separate the broader mental health and illness outcome into self-reported psychological distress and clinician reported mental health. The granular outcome of self-reported psychological distress resulted in 100% consensus to include. On the contrary clinician reported mental health did not meet consensus criteria (45%). Similar discussions happened around the recurrence (relapse) outcome, whereby its inclusion in a core outcome set, would ultimately necessitate buy-in to criteria model, which suggested that mental health problems could and should be completely resolved.

Discussions around the ‘suicide attempted’ outcome indicated that participants felt that suicide attempts or self-harm had diverse motivations and definitions and they discussed the issues of delineating the boundaries of self-harm and suicide attempts and how this is documented. After the consensus meeting this outcome no-longer meet consensus criteria to include. Discussions surrounding personal recovery, functioning and meaningful activity indicated that participants considered these outcomes too vague and subjective to be a component of a core outcome set. There was consensus to exclude meaningful activity and recovery, and no consensus to include personal recovery. There was consensus to exclude discharge to appropriate accommodation, discussion indicated this was primarily because this spanned the health and social care boundaries and may not be applicable to every intervention.

On completion of the meeting, only four outcomes met consensus criteria for inclusion, see Table 4. A core outcome set of four was agreed, participants agreed that the following should be included: readmission, quality of life, suicide completed and service user reported psychological distress. Readmission was the most frequently used outcome in past research, and despite limitations, participants felt it was one of the only proxy measures of appropriate discharge. Quality of life and psychological distress were considered important ways of quantitatively assessing the psycho-social elements of discharge; which are of primary importance. Suicide completed was considered rare but imperative data to capture given the research highlighting the relationship between acute mental health discharge and suicide highlighted by a growing body of literature [5,33]. Figure 1 shows the process undertaken to reach the core outcome set.

Table 2: Participants that attended consensus meeting

| PP Number | Researcher | Service User | Healthcare Professional | End-user of Research |
|-----------|------------|--------------|-------------------------|----------------------|
| 1         | X          |              |                         |                      |
| 2         | X          |              |                         |                      |
| 3         | X          |              |                         |                      |
| 4         | X          |              | X                       |                      |
| 5         | X          | X            |                         |                      |
| 6         | X          |              |                         | X                    |
| 7         |            |              | X                       |                      |
| 8         |            |              | X                       | X                    |
| 9         |            | X            |                         |                      |
| 10        |            | X            |                         |                      |
| 11        |            |              |                         | X                    |
| Total     | 6          | 3            | 3                       | 3                    |

Table 3: Outcomes of consensus meeting, levels of consensus in anonymous voting

|             | Include | Exclude | Percentage |
|-------------|---------|---------|------------|
| Readmission | 10      | 1       | 91%        |



|                                                                   |    |    |      |
|-------------------------------------------------------------------|----|----|------|
| Service user reported psychological distress                      | 11 | 0  | 100% |
| Suicide completed                                                 | 9  | 2  | 82%  |
| QoL                                                               | 9  | 2  | 82%  |
| Reoccurrence                                                      | 4  | 7  | 36%  |
| Mental Health and Illness                                         | 8  | 3  | 73%  |
| Service user involvement in decision making                       | 7  | 4  | 64%  |
| Personal Recovery                                                 | 6  | 5  | 55%  |
| Meaningful Activity                                               | 1  | 10 | 9%   |
| Functioning                                                       | 1  | 10 | 9%   |
| Clinician Reported Mental Health                                  | 5  | 6  | 45%  |
| Service User Satisfaction with information provision at discharge | 3  | 8  | 27%  |
| Service user understanding of the discharge plan                  | 3  | 8  | 27%  |
| Suicide Attempted                                                 | 3  | 8  | 27%  |
| Service User Involvement in Discharge Planning                    | 6  | 5  | 55%  |
| Knowledge of how to access support in a crisis                    | 5  | 6  | 45%  |
| Discharge to appropriate accommodation                            | 0  | 11 | 0%   |

Table 4: The final core outcome set

| Final Core Outcome Set |                                              |
|------------------------|----------------------------------------------|
| 1                      | Readmission                                  |
| 2                      | Quality of Life                              |
| 3                      | Suicide Completed                            |
| 4                      | Service User Reported Psychological Distress |

<insert figure 1>

## Discussion

1  
2  
3  
4 This study provides the first international consensus on outcomes for intervention studies  
5 concerning discharge from an acute adult mental health inpatient setting. We could not  
6 identify any other published core outcome sets for interventions concerning discharge from  
7 acute mental health services. Moreover, there are very few core outcome sets for mental  
8 health, despite recommendations for consensus in the literature [18,21]. All the included  
9 outcomes were agreed upon by more than 75% of a group of relatively equally-represented  
10 service-users and family/carers, health-care professionals, researchers and end-user of  
11 research using consensus methods. We recommend that all future research studies evaluating  
12 interventions for discharge from acute adult mental health settings use this core outcome set  
13 as a framework for outcome selection, to compliment, rather than replace any other outcomes  
14 that are relevant to their research question. As discharge from acute services is a particularly  
15 challenging period for those experiencing mental health problems [3,33], it's important to  
16 understand what interventions work and more specifically which elements of an intervention  
17 improve which particular outcomes. This core outcome set provides a framework for  
18 between-study comparison, ultimately enabling researchers to articulate the theory of change  
19 that underpins interventions.  
20  
21  
22  
23

24 In our systematic review [1], we identified 22 studies that reported readmission rates as an  
25 outcome, yet almost all of them captured this in different ways: some used self-report data,  
26 some clinical case notes or some retrospective administrative data, others used case  
27 manager's reports. In addition the time markers were variable, some used country specific  
28 time markers in line with policy such as 28 days in the UK [34], whilst others chose a series  
29 of time markers such as within 1 month, 3 month and 6 months, but the time markers were  
30 rarely directly comparable. Similarly, six studies measured quality of life but, only two used  
31 the same measurement instrument (Lehman's Quality of Life) [16,35]. In the current study,  
32 we have developed consensus that Quality of Life and Readmission are important and  
33 feasible to measure, robust recommendations of how best to measure these are now needed.  
34  
35

36 There were some unexpected exclusions in the core outcome set, for example mental health  
37 symptoms and treatment adherence were frequently used in past research [1], but not  
38 included in the core outcome set. In the background of this paper we described the recent  
39 Kings Fund report that suggested generating agreement amongst healthcare professionals,  
40 service users, policy makers and researchers is a difficult but imperative task [21]. Our work  
41 reiterates this findings, and the small four-item core outcome set represents the only  
42 outcomes that are unanimously agreed upon, despite so many outcomes being of upmost  
43 importance to service-users and families.  
44

45 This research has further highlighted the importance of shared decision making and service-  
46 user and family involvement to all stakeholder groups [36].  
47  
48

49 This study indicates an impending desire to assess service-user satisfaction and involvement  
50 in the process. Whilst such outcomes, were excluded in later stages of this research, it does  
51 not reduce their prospective importance in discharge interventions or provision of care at  
52 discharge. The five most agreed upon elements of service-user involvement and satisfaction  
53 in discharge were: Service user involvement in discharge planning; Service user  
54 understanding of discharge plan; Service user involvement in decision making; Service user  
55 satisfaction with information provision at discharge; Service user knowledge of how to access  
56 community support. Policy makers and healthcare management might consider measuring  
57 these five things in local level initiatives as overriding principles of care to ensure they are  
58 not missing from care provision.  
59  
60

1  
2  
3 Research highlighting the importance of involving service users in mental health care  
4 planning is emerging, along with measures of such activity. Therefore, we suggest that future  
5 research could include a service user reported outcome measure of involvement alongside the  
6 4-item core outcome set and any other chosen measures. This could be measured in an  
7 existing instrument of service-user involvement care planning in mental health, such as the  
8 EQUIP PROM (Patient Reported Outcome Measure) [36]. The 6 outcomes described above  
9 can also be presented as self-reported Likert measure of service user involvement in  
10 discharge planning (see additional file 5). These 6 items are developed from synthesis of  
11 academic literature, qualitative questionnaires and met criteria for consensus amongst experts  
12 in round 2, so from a psychometric perspective would arguably meet initial face and content  
13 validity criteria [37].  
14  
15

16  
17 The difficulties of developing a mental health core outcome set was further epitomised when  
18 applied to care transitions: a service-level (rather than specific clinical population) multi-  
19 agency, multi-stage, complex period of the care pathway [3,22]. Generating a set of  
20 meaningful applicable outcomes that span primary and secondary care, across multiple  
21 physical locations, that are relevant for every service user was imperative. For example, a  
22 great deal of past literature focuses on housing interventions [38–40], and whilst housing is a  
23 significant safety issue at discharge, it's not necessarily relevant to all service users. This  
24 multi-agency, multi-morbidity complexity was arguably one factor that resulted in the small  
25 set of generic outcomes, that arguably differs from narrowly defined clinical core outcome set  
26 reported in past literature of many more outcomes [41,42].  
27  
28

29  
30 This study had several strengths. Our method is based on recommendations from an  
31 international panel of experts [23]. Inclusion of service-users and health-care professionals at  
32 every stage ensured that outcomes in the final core set embody shared priorities. The  
33 comprehensive and laborious long-list process ensured all potential outcomes were  
34 considered in the course of the consensus process. However, there were some limitations to  
35 our study. The research was only conducted in English, due to budgetary constraints,  
36 although our online rounds included participants from 12 countries. Furthermore, in many  
37 consensus meetings additional outcomes are often added, the method infrequently serves as  
38 means of reducing the number of outcomes included in the preliminary core outcome set  
39 from the Delphi [30]. However, in our case we found that the group did not agree with many  
40 of the outcomes and it was reduced to a very small COS of 4 items. This is beneficial in some  
41 ways, as we hope it is easier for researchers to operationalise a four-item core outcome set.  
42  
43  
44

45  
46 The use of outcomes in mental health research and service, is becoming more contested in  
47 terms of what is meaningful and effective, it could be argued that core outcomes sets are less  
48 applicable to mental health populations than general health populations, given the complexity  
49 of mental health problems and the subjectivity of measuring it. However, as core outcomes  
50 sets are relatively uncommon in mental health, we believe (similar to other clinical  
51 populations) a small, agreed, feasible set of core outcomes will facilitate between study  
52 comparability and advancement in evidence collection [19,23].  
53  
54

### 55 **Future Directions**

56  
57 Development of this core outcome set involved participation of stakeholders from 12  
58 different countries; (primarily researchers) however, we recommend that further work should  
59 be undertaken to validate this core outcome set more widely, particularly in non-English  
60

speaking populations. The two of the final four outcomes and many of the preliminary 15 outcomes to emerge from the Delphi, are not necessarily specific to mental health care transitions. Some outcomes are comparable to a similar core outcome set for care transitions of adolescents and young adults with special healthcare needs [43]. Future research may consider a 'transitions of care' core outcome set, to reduce the number of similar core outcome sets.

Another key priority to make this core outcome set operationalised is to agree upon measurement criteria using the COSMIN guidelines [44]. We conducted some preliminary questionnaires with the Delphi panel to produce preliminary measurement recommendations, however there was very little agreement amongst panellists (see additional file 6). Another key priority to make this core outcome set operationalised is to agree upon measurement criteria using the COSMIN guidelines [44]. We conducted some preliminary questionnaires with the Delphi panel to produce preliminary measurement recommendations, however there was very little agreement amongst panellists (see additional file 6). The recommended measures by the panel were Kessler Psychological Distress (K10) and Recovery Quality of Life (ReQoL) within one month of discharge [45,46]. Readmission and suicide completed rates were recommended to be captured within 28 days of discharge using retrospective review of administrative data. However, these are only preliminary recommendations and we highly recommend a future study following COSMIN guidelines.

## Conclusion

The four outcomes included in our outcome set represent the consensus opinion of a group of service-users, health-care professionals, and international researchers and addresses an unmet necessity: assisting researchers in the design, implementation and reporting of interventions that aim to improve discharge from acute mental health settings. Ultimately, application of this core outcome set will enhance the relevance of future interventions to health-care professionals, the research community and service-users. If used, the core outcome set could provide more evidenced-based interventions, underpinned by theory of change outlining the relationships between the component of the intervention and the outcome it should improve[1,47]; which should increase service-user safety at this distressing time period.

## Patients' consent and permission to publish

All participants gave informed consent to be involved in the study ahead of data collection.

## Author Contributions

NT conceived the design of the study; conducted the literature search, meta-synthesis and Delphi; analysed the data; and drafted the majority of the manuscript. JW and NW contributed equally and provided oversight of the study design, analysed and synthesised the data and contributed significantly to the drafting of the manuscript. AG analysed and synthesised data, provided an expert by lived experience opinion on decisions made in regards to wording, study design, PPI involvement, and also contributed adaptations to the manuscript.

## Conflicts of Interest

1  
2  
3 The authors report no conflicts of interest  
4

### 5 **Ethics Committee Approval**

6  
7  
8 This research received a favourable ethics opinion from Nottingham University Business  
9 School Ethics Committee.

### 10 **Role of Funding Source**

11  
12  
13 This research is funded by the NIHR Greater Manchester Patient Safety Translational  
14 Research Centre, they had no role in the writing of manuscript or decision to submit.

### 15 **Data Statement**

16  
17  
18 Data is available upon reasonable request

### 19 **Acknowledgements**

20  
21  
22 We would like to thank the patient and public involvement group for their help in designing  
23 the questionnaires. The following participants chose to be acknowledged for their  
24 participation and the remainder chose to remain anonymous:

25  
26  
27 Amy Clowes, Andrew Gallivan, Anna Hegedus, Anna Willis, Bernd Puschner, Cara Sturgess,  
28 Cassandra Lovelock, Cheryl Forchuk RN PhD, Colette Ramsey, David Cochrane, David  
29 Smelson, David Smith, Deb Smith, Dr Leah Quinlivan, Dr Nicola Clibbens, Dr Sarah  
30 Markham, Dr. Pucciarelli Gianluca, PhD, E Thomas, Emma Ward, Hameed Khan, Hazel  
31 Nash, Helene Provencher, Jan Hutchinson, Jane McNeice, Jean Nicholls, Justin Scanlan, Kyri  
32 Gregoriou, Law, Yik Wa, Liz Monaghan, Mark S. Smith, Mark Trewin, Matthew Mckenzie,  
33 Michael P. Hengartner, Mohammad Ghadirivasfi, Mrs Z Burns, Philippe Golay, Phyllis  
34 Solomon, Ph.D., Prof Roger Webb, Rebecca Stack, Sarah, Sarah Gunn, Sarah Markham,  
35 Shaun Thomson, Umar Kankiya, Usha Sambamoorthi, Zoe Swithenbank  
36  
37  
38  
39  
40  
41  
42

43 Figure 1 Caption: Process of reducing the outcomes to a set of four core outcomes  
44

45 **Word Count:** 5250

### 46 **References**

- 47  
48  
49  
50 [1] Tyler N, Wright N, Waring J. Interventions to improve discharge from acute adult  
51 mental health inpatient care to the community: systematic review and narrative  
52 synthesis. *BMC Health Serv Res* 2019;19:883. <https://doi.org/10.1186/s12913-019-4658-0>.  
53  
54 [2] Waring J, McDonald R, Harrison S. Safety and complexity: Inter-departmental  
55 relationships as a threat to patient safety in the operating department. *J Heal Organ*  
56 *Manag* 2006. <https://doi.org/10.1108/14777260610662753>.  
57  
58 [3] Wright N, Rowley E, Chopra A, Gregoriou K, Waring J. From admission to discharge  
59 in mental health services: a qualitative analysis of service user involvement. *Heal*  
60 *Expect* 2016;19:367–76. <https://doi.org/10.1111/hex.12361>.



- 1  
2  
3 [4] Walter F, Carr MJ, Mok PLH, Astrup A, Antonsen S, Pedersen CB, et al. Premature  
4 Mortality Among Patients Recently Discharged From Their First Inpatient Psychiatric  
5 Treatment. *JAMA Psychiatry* 2017;74:485–92.  
6 <https://doi.org/10.1001/jamapsychiatry.2017.0071>.  
7  
8 [5] Burns J, Flynn S, Lowe R, Turnbull P, Baird A, Stones P, et al. The National  
9 Confidential Inquiry into Suicide and Homicide by People with Mental Illness. 2017.  
10 [6] Abraham O, Myers MN, Brothers AL, Montgomery J, Norman BA, Fabian T.  
11 Assessing need for pharmacist involvement to improve care coordination for patients  
12 on LAI antipsychotics transitioning from hospital to home: A work system approach.  
13 *Res Social Adm Pharm* 2017;13:1004–13.  
14 <https://doi.org/https://dx.doi.org/10.1016/j.sapharm.2017.02.006>.  
15 [7] Exbrayat S, Coudrot C, Gourdon X, Gay A, Sevos J, Pellet J, et al. Effect of telephone  
16 follow-up on repeated suicide attempt in patients discharged from an emergency  
17 psychiatry department: a controlled study. *BMC Psychiatry* 2017;17.  
18 <https://doi.org/10.1186/s12888-017-1258-6>.  
19 [8] Vigod SN, Kurdyak PA, Dennis C-L, Leszcz T, Taylor VH, Blumberger DM, et al.  
20 Transitional interventions to reduce early psychiatric readmissions in adults:  
21 systematic review. *Br J Psychiatry* 2013;202:187–94.  
22 <https://doi.org/10.1192/bjp.bp.112.115030>.  
23 [9] Waring J, Bishop S, Marshall F, Tyler N, Vickers R. An ethnographic study comparing  
24 approaches to inter-professional knowledge sharing and learning in discharge planning  
25 and care transitions. *J Heal Organ Manag* 2019.  
26 [10] Walker SA, Naji SA, Howie FL, Andrew J, Cameron IM, Eagles JM. The  
27 effectiveness of psychiatric discharge coordinators. *Prim Care Psychiatry* 2000.  
28 <https://doi.org/10.1185/135525700543370>.  
29 [11] Bennewith O, Evans J, Donovan J, Paramasivan S, Owen-Smith A, Hollingworth W,  
30 et al. A Contact-Based Intervention for People Recently Discharged from Inpatient  
31 Psychiatric Care: A Pilot Study. *Arch Suicide Res* 2014.  
32 <https://doi.org/10.1080/13811118.2013.838196>.  
33 [12] D'souza R. Improving Treatment Adherence and Longitudinal Outcomes in Patients  
34 with a Serious Mental Illness by Using Telemedicine. *J Telemed Telecare* 2002.  
35 <https://doi.org/10.1177/1357633X020080S251>.  
36 [13] Exbrayat S, Coudrot C, Gourdon X, Gay A, Sevos J, Pellet J, et al. Effect of telephone  
37 follow-up on repeated suicide attempt in patients discharged from an emergency  
38 psychiatry department: A controlled study. *BMC Psychiatry* 2017.  
39 <https://doi.org/10.1186/s12888-017-1258-6>.  
40 [14] Forchuk C, Martin ML, Chan YL, Jensen E. Therapeutic relationships: From  
41 psychiatric hospital to community. *J Psychiatr Ment Health Nurs* 2005;12:556–64.  
42 <https://doi.org/10.1111/j.1365-2850.2005.00873.x>.  
43 [15] Juven-Wetzler A, Bar-Ziv D, Cwikel-Hamzany S, Abudy A, Peri N, Zohar J. A pilot  
44 study of the “Continuation of Care” model in “revolving-door” patients. *Eur*  
45 *Psychiatry* 2012;27:229–33. <https://doi.org/10.1016/j.eurpsy.2011.05.003>.  
46 [16] Jensen E, Chapman P, Davis A, Forchuk C, Seymour B, Witcher P, et al. An  
47 Evaluation of Community-Based Discharge Planning in Acute Mental Health Care.  
48 *Can J Community Ment Heal* 2010;29:111–24. <https://doi.org/10.7870/cjcmh-2010-0038>.  
49 [17] Steffen S, Kösters M, Becker T, Puschner B. Discharge planning in mental health care:  
50 A systematic review of the recent literature. *Acta Psychiatr Scand* 2009;120:1–9.  
51 <https://doi.org/10.1111/j.1600-0447.2009.01373.x>.  
52 [18] Steffen S, Kösters M, Becker T, Puschner B. Discharge planning in mental health care:

- 1  
2  
3 A systematic review of the recent literature. *Acta Psychiatr Scand* 2009;120:1–9.  
4 <https://doi.org/http://dx.doi.org/10.1111/j.1600-0447.2009.01373.x>.
- 5 [19] Williamson PR, Altman DG, Bagley H, Barnes KL, Blazeby JM, Brookes ST, et al.  
6 The COMET Handbook: Version 1.0. *Trials* 2017. [https://doi.org/10.1186/s13063-](https://doi.org/10.1186/s13063-017-1978-4)  
7 [017-1978-4](https://doi.org/10.1186/s13063-017-1978-4).
- 8 [20] Williamson PR, Altman DG, Blazeby JM, Clarke M, Devane D, Gargon E, et al.  
9 Developing core outcome sets for clinical trials: Issues to consider. *Trials* 2012.  
10 <https://doi.org/10.1186/1745-6215-13-132>.
- 11 [21] Lang K. Outcomes for mental health services: what really matters? | HSR UK. 2019.
- 12 [22] Waring J, Marshall F, Bishop S, Sahota O, Walker M, Currie G, et al. An ethnographic  
13 study of knowledge sharing across the boundaries between care processes, services and  
14 organisations: the contributions to ‘safe’ hospital discharge. *Heal Serv Deliv Res* 2014.  
15 <https://doi.org/10.3310/hsdr02290>.
- 16 [23] Kirkham JJ, Davis K, Altman DG, Blazeby JM, Clarke M, Tunis S, et al. Core  
17 Outcome Set-STAndards for Development: The COS-STAD recommendations. *PLoS*  
18 *Med* 2017. <https://doi.org/10.1371/journal.pmed.1002447>.
- 19 [24] Pedersen ER, Helmuth ED, Marshall GN, Schell TL, PunKay M, Kurz J. Using  
20 Facebook to Recruit Young Adult Veterans: Online Mental Health Research. *JMIR*  
21 *Res Protoc* 2015. <https://doi.org/10.2196/resprot.3996>.
- 22 [25] Contributed Talks. *J Evid Based Med* 2019;12:24–7.  
23 <https://doi.org/10.1111/jebm.12336>.
- 24 [26] Thomas J, Harden A. Methods for the thematic synthesis of qualitative research in  
25 systematic reviews. *BMC Med Res Methodol* 2008;8:45. [https://doi.org/10.1186/1471-](https://doi.org/10.1186/1471-2288-8-45)  
26 [2288-8-45](https://doi.org/10.1186/1471-2288-8-45).
- 27 [27] Qualtrics. Qualtrics: The World’s Leading Research & Insights Platform. Qualtrics  
28 2016. <https://doi.org/10.3109/03639045.2013.790903>.
- 29 [28] Preston CC, Colman AM. Optimal number of response categories in rating scales:  
30 Reliability, validity, discriminating power, and respondent preferences. *Acta Psychol*  
31 (Amst) 2000;104:1–15. [https://doi.org/10.1016/S0001-6918\(99\)00050-5](https://doi.org/10.1016/S0001-6918(99)00050-5).
- 32 [29] Hsu C, Sandford B. The delphi technique: making sense of consensus. *Pract*  
33 *Assessment, Res Eval* 2007;12:1–8. [https://doi.org/10.1016/S0169-2070\(99\)00018-7](https://doi.org/10.1016/S0169-2070(99)00018-7).
- 34 [30] Bell BG, Spencer R, Avery AJ, Campbell SM. Tools for measuring patient safety in  
35 primary care settings using the RAND/UCLA appropriateness method. *BMC Fam*  
36 *Pract* 2014;15:110. <https://doi.org/10.1186/1471-2296-15-110>.
- 37 [31] Avery AJ, Dex GM, Mulvaney C, Serumaga B, Spencer R, Lester HE, et al.  
38 Development of prescribing-safety indicators for GPs using the RAND  
39 Appropriateness Method. *Br J Gen Pract* 2011;61:e526–36.  
40 <https://doi.org/10.3399/bjgp11X588501>.
- 41 [32] Kirkham JJ, Gorst S, Altman DG, Blazeby J, Clarke M, Devane D, et al. COS-STAR:  
42 A reporting guideline for studies developing core outcome sets (protocol). *Trials* 2015.  
43 <https://doi.org/10.1186/s13063-015-0913-9>.
- 44 [33] Walter F, Carr MJ, Mok PLH, Antonsen S, Pedersen CB, Shaw J, et al. Suicide  
45 Methods and Specific Types of Accidental Death and Fatal Poisoning Among  
46 Discharged Psychiatric Patients: A National Cohort Study. *J Clin Psychiatry* 2018;79.  
47 <https://doi.org/10.4088/JCP.17m11809>.
- 48 [34] Ali AM, Bottle A. How do we interpret readmission rates? *BMJ* 2018.  
49 <https://doi.org/10.1136/bmj.k3104>.
- 50 [35] Tomita A, Lukens EP, Herman DB. Mediation analysis of critical time intervention for  
51 persons living with serious mental illnesses: assessing the role of family relations in  
52 reducing psychiatric rehospitalization. *Psychiatr Rehabil J* 2014;37:4–10.  
53  
54  
55  
56  
57  
58  
59  
60

- 1  
2  
3  
4  
5  
6  
7  
8  
9  
10  
11  
12  
13  
14  
15  
16  
17  
18  
19  
20  
21  
22  
23  
24  
25  
26  
27  
28  
29  
30  
31  
32  
33  
34  
35  
36  
37  
38  
39  
40  
41  
42  
43  
44  
45  
46  
47  
48  
49  
50  
51  
52  
53  
54  
55  
56  
57  
58  
59  
60
- <https://doi.org/10.1037/prj0000015>.
- [36] Lovell K, Bee P, Brooks H, Cahoon P, Callaghan P, Carter L-A, et al. Embedding shared decision-making in the care of patients with severe and enduring mental health problems: The EQUIP pragmatic cluster randomised trial. *PLoS One* 2018;13:e0201533. <https://doi.org/10.1371/journal.pone.0201533>.
- [37] Falzarano M, health GZ-J of allied, 2013 undefined. Seeking consensus through the use of the Delphi technique in health sciences research. *IngentaconnectCom* n.d.
- [38] Forchuk C, Russell G, Kingston-Macclure S, Turner K, Dill S. From psychiatric ward to the streets and shelters. *J Psychiatr Ment Health Nurs* 2006;13:301–8. <https://doi.org/http://dx.doi.org/10.1111/j.1365-2850.2006.00954.x>.
- [39] Forchuk C, Godin M, Hoch JS, Kingston-MacClure S, Jeng M (Mo) S, Puddy L, et al. Preventing Homelessness After Discharge from Psychiatric Wards: Perspectives of Consumers and Staff. *J Psychosoc Nurs Ment Health Serv* 2013;51:24–31. <https://doi.org/10.3928/02793695-20130130-02>.
- [40] Tomita A, Herman DB. The Role of a Critical Time Intervention on the Experience of Continuity of Care Among Persons With Severe Mental Illness After Hospital Discharge. *J Nerv Ment Dis* 2015;203:65–70. <https://doi.org/10.1097/NMD.0000000000000224>.
- [41] Fish R, Sanders C, Adams R, Brewer J, Brookes ST, DeNardo J, et al. A core outcome set for clinical trials of chemoradiotherapy interventions for anal cancer (CORMAC): a patient and health-care professional consensus. *Lancet Gastroenterol Hepatol* 2018. [https://doi.org/10.1016/S2468-1253\(18\)30264-4](https://doi.org/10.1016/S2468-1253(18)30264-4).
- [42] Boers M, Brooks P, Simon LS, Strand V, Tugwell P. OMERACT: An international initiative to improve outcome measurement in rheumatology. *Clin Exp Rheumatol* 2005;23. <https://doi.org/10.1186/1745-6215-8-38>.
- [43] Fair C, Cuttance J, Sharma N, Maslow G, Wiener L, Betz C, et al. International and Interdisciplinary Identification of Health Care Transition Outcomes. *JAMA Pediatr* 2016;170:205. <https://doi.org/10.1001/jamapediatrics.2015.3168>.
- [44] Mokkink LB, Terwee CB, Knol DL, Stratford PW, Alonso J, Patrick DL, et al. The COSMIN checklist for evaluating the methodological quality of studies on measurement properties: A clarification of its content. *BMC Med Res Methodol* 2010;10. <https://doi.org/10.1186/1471-2288-10-22>.
- [45] Keetharuth AD, Brazier J, Connell J, Bjorner JB, Carlton J, Buck ET, et al. Recovering Quality of Life (ReQoL): A new generic self-reported outcome measure for use with people experiencing mental health difficulties. *Br J Psychiatry* 2018. <https://doi.org/10.1192/bjp.2017.10>.
- [46] Andrews G, Slade T. Interpreting scores on the Kessler Psychological Distress Scale (K10). *Aust N Z J Public Health* 2001. <https://doi.org/10.1111/j.1467-842X.2001.tb00310.x>.
- [47] Davidoff F, Dixon-Woods M, Leviton L, Michie S. Demystifying theory and its use in improvement. *BMJ Qual Saf* 2015;24:228–38. <https://doi.org/10.1136/bmjqs-2014-003627>.



1  
2  
3  
4  
5  
6  
7  
8  
9  
10  
11  
12  
13  
14  
15  
16  
17  
18  
19  
20  
21  
22  
23  
24  
25  
26  
27  
28  
29  
30  
31  
32  
33  
34  
35  
36  
37  
38  
39  
40  
41  
42  
43  
44  
45  
46  
47  
48  
49  
50  
51  
52  
53  
54  
55  
56  
57  
58  
59  
60



Process of reducing the outcomes to a set of four core outcomes

133x142mm (96 x 96 DPI)

## Supplementary Material

**File 1: Table of questions asked in qualitative questionnaire**

| Group                      | Question                                                                                                                                                      |
|----------------------------|---------------------------------------------------------------------------------------------------------------------------------------------------------------|
| All Participants           | What would make discharge from an acute mental health ward <b>safe</b> in your opinion?                                                                       |
| All Participants           | What would make discharge from an acute mental health ward <b>effective</b> in your opinion?                                                                  |
| All Participants           | What would you like to see prioritised for research into discharge from an acute ward?                                                                        |
| All Participants           | Can you think of any important outcomes to measure in research assessing discharge interventions?                                                             |
| Service User               | What do you think is the most difficult aspect of discharge from a mental health acute ward?                                                                  |
| Service User               | What might improve discharge from a mental health ward?                                                                                                       |
| Service User               | Was there any one person/group/intervention which really made a difference for you? If so what was it? What made it so powerful?                              |
| Service User               | Do you have any other feelings or concerns not addressed in previous questions?                                                                               |
| Family member/carer        | What do you consider to be the most difficult components of discharge for your family member/friend from an acute mental health ward?                         |
| Family member/carer        | What types of improvement would you expect to see in your family member/friend following a successful discharge from an acute mental health ward?             |
| Mental health professional | What do you consider to be the most difficult aspects of discharge from an acute unit for your service-users?                                                 |
| Mental health professional | Are there any changes/behaviours you would expect to see in a service-user during or following a safe and/or effective discharge?                             |
| Researchers                | If applicable, what outcomes did you measure in past research (of discharge interventions)?                                                                   |
| Researchers                | Are there any concepts that you think are important to measure, but chose not to, due to not having a suitable measurement instrument?                        |
| End users of research      | If you were looking to use research to inform changes to the discharge procedure within your professional role, what outcomes would you like to see reported? |
| End users of research      | In your opinion, what measurements would persuade you that a discharge intervention is effective?                                                             |

## File 2: Results of Meta-synthesis of Outcomes and data from questionnaire

### Clinical

| From Review                     | Additional from Meta-synthesis                                             |
|---------------------------------|----------------------------------------------------------------------------|
| Reoccurrence (i.e. Relapse)     | Stability                                                                  |
| Clinical Recovery               | Physical Health and Wellbeing                                              |
| Personal Recovery               | Iatrogenic harm (patient safety incidents- harm caused by the care system) |
| Substance Misuse (inc. alcohol) | Serious accidental injury                                                  |
| Self-injury (i.e. harm to self) | Mortality                                                                  |
| Suicide Risk                    | Mental health and illness (symptoms/psychological distress)                |
| Suicidal Ideation               |                                                                            |
| Suicide Attempted               |                                                                            |
| Suicide Completed               |                                                                            |
| Medication Knowledge            |                                                                            |
| Medication Adherence            |                                                                            |
| Medication Side Effects         |                                                                            |
| Medication Management           |                                                                            |
| Global Functioning              |                                                                            |

### Service

| From Review                                                  | Additional from Meta-synthesis                                            |
|--------------------------------------------------------------|---------------------------------------------------------------------------|
| Emergency department visits post discharge                   | Police intervention post discharge                                        |
| Readmission                                                  | Engagement with psychological intervention                                |
| Length of stay pre-discharge                                 | Engagement with community services                                        |
| Length of stay post-discharge (i.e. subsequent readmissions) | Availability of appropriate community support (i.e. allocated key worker) |
| Outpatient appointment/visit adherence                       | Length of time before follow up/aftercare                                 |
| Service use                                                  | Leaving the hospital against medical advice                               |
|                                                              | Service user involvement in decision making (shared decision making)      |
|                                                              | Serious incidents (i.e. serious incidents reported formally)              |

### Satisfaction

| From Review                                    | Additional from Meta-synthesis                                                                                       |
|------------------------------------------------|----------------------------------------------------------------------------------------------------------------------|
| Service user expectations of care              | Professionals/care teams satisfaction with information provision at discharge                                        |
| Service user satisfaction with discharge       | Service user satisfaction with information provision at discharge (e.g. regarding medication, risk, crisis planning) |
| Service user experience of discharge           |                                                                                                                      |
| Service user satisfaction with treatment       |                                                                                                                      |
| Carer/family/other satisfaction with discharge |                                                                                                                      |
| Staff satisfaction with discharge              |                                                                                                                      |

### Personal

| From Review                                              | Additional from Meta-synthesis                                                    |
|----------------------------------------------------------|-----------------------------------------------------------------------------------|
| Hopelessness                                             | Feelings of safety                                                                |
| Boredom                                                  | Feelings of support (from various groups- i.e. family, professionals and friends) |
| Loneliness                                               | Experience of stigma                                                              |
| Isolation                                                | Quality of interpersonal relationships (friends and family)                       |
| Coping skills                                            | Self-management                                                                   |
| Concern/anxiety about discharge                          |                                                                                   |
| Autonomy (e.g. independence, autonomous decision making) |                                                                                   |

|                                                |  |
|------------------------------------------------|--|
| Housing Stability                              |  |
| Discharge to appropriate accommodation         |  |
| Service user knowledge of own condition        |  |
| Quality of life                                |  |
| Community participation                        |  |
| Violence                                       |  |
| Aggression                                     |  |
| Victim of crime                                |  |
| Stable relationships with health professionals |  |
| Employment                                     |  |

### Discharge Planning

| From Review | Additional from Meta-synthesis                                                                                            |
|-------------|---------------------------------------------------------------------------------------------------------------------------|
|             | Service user involvement in discharge planning                                                                            |
|             | Family/carer involvement in discharge planning                                                                            |
|             | Advocate involvement in discharge planning                                                                                |
|             | Completion of planned care                                                                                                |
|             | Continuity of contact                                                                                                     |
|             | Service user readiness for discharge (incl. preparation)                                                                  |
|             | Clinical readiness for discharge                                                                                          |
|             | Experience of coercion at discharge (e.g. feeling forced to leave)                                                        |
|             | Provision of financial support (e.g. benefits advice, debt advice)                                                        |
|             | Delays in expected discharge                                                                                              |
|             | Service availability (e.g. availability of community services, CPN, follow-up, social worker, bed in residential service) |
|             | Family/carer/other readiness for discharge                                                                                |
|             | Staff understanding of safe and effective discharge                                                                       |
|             | Plan for community engagement                                                                                             |
|             | Is there a plan for care post discharge created                                                                           |
|             | Has the plan for care post-discharge been communicated with patient                                                       |
|             | Has information about the discharge been reported to other relevant services                                              |

### Changes/Combinations

| Outcomes from Review                  | Changes/Combinations                                                          |
|---------------------------------------|-------------------------------------------------------------------------------|
| Social Recovery                       | Combined into quality of interpersonal relationships                          |
| Relapse                               | PPI suggestion change to reoccurrence                                         |
| Self-harm                             | PPI suggestion change to self-injury                                          |
| Depression                            | Combined into symptoms                                                        |
| Anxiety                               | Combined into symptoms                                                        |
| Illegal drug use                      | Combined into substance misuse                                                |
| Alcohol use                           | Combined into substance misuse                                                |
| Addiction severity                    | Combined into substance misuse                                                |
| Crisis planning                       | Combined into information provision                                           |
| Risk communication                    | Combined into information provision                                           |
| Allocated worker                      | Combined into availability of appropriate community support                   |
| Better knowledge transfer             | Combined into information provision (professional)                            |
| Therapeutic alliance                  | Combined into stable relationships with HPs                                   |
| Contact with ambulatory care          | Combined into emergency visits                                                |
| Treatment adherence                   | Combined into medication adherence and engagement with psychological services |
| 7 day follow up                       | Changed to length of time before follow up for global audience                |
| Psychological distress                | Combined into symptoms                                                        |
| Family relations                      | Combined into quality of interpersonal relationships                          |
| Community integration and functioning | Combined into Community participation                                         |

### Outcomes Removed from Process

| Outcomes from Review      | Reason       |
|---------------------------|--------------|
| Antipsychotic Politherapy | Too specific |
| Autistic life             | Too specific |

|                                        |                           |
|----------------------------------------|---------------------------|
| Medication Problems                    | Too vague                 |
| Functional Recovery                    | Meaning not explicit      |
| Satisfaction with service in community | Not relevant for this COS |
| Global satisfaction with discharge     | Meaning not explicit      |
| Quality of care                        | Too vague                 |
| Treatment decision making              | Not relevant for this COS |
| Financial cost to provider             | Impossible to measure     |
| Number of beds                         | Too vague                 |
| Staff workload                         | Too vague                 |
| Freedom                                | Too vague                 |
| Self-activity                          | Too vague                 |

#### Carer outcomes

| Outcomes from Review               | Decision                 |
|------------------------------------|--------------------------|
| Caregiver Burden                   | Yes                      |
| Caregiver Health Status            | No (too specific)        |
| Caregiver Knowledge about illness  | Yes                      |
| <b>From Synthesis</b>              |                          |
| Carer support                      | No                       |
| Relationship between family and SU | No (probably a variable) |

File 3: Participant Demographics

| Categories |               |                     |                          |             |                       |            |            |            |       |               |                          |  |
|------------|---------------|---------------------|--------------------------|-------------|-----------------------|------------|------------|------------|-------|---------------|--------------------------|--|
| Group      | Service Users | Families and Carers | Healthcare Professionals | Researchers | End-users of Research |            |            |            |       |               |                          |  |
| <b>n</b>   | 27            | 17                  | 39                       | 37          | 15                    |            |            |            |       |               |                          |  |
| Gender     | Male          | Female              | Other                    |             |                       |            |            |            |       |               |                          |  |
| <b>n</b>   | 28            | 63                  | 0                        |             |                       |            |            |            |       |               |                          |  |
| Age        | 18-24         | 25-34               | 35-44                    | 45-54       | 55-64                 | 65-74      | 75-84      |            |       |               |                          |  |
| <b>n</b>   | 4             | 20                  | 30                       | 24          | 10                    | 4          | 1          |            |       |               |                          |  |
| Location   | International | East of England     | East Midlands            | London      | North West            | North East | South East | South West | Wales | West Midlands | Yorkshire and the Humber |  |
| <b>n</b>   | 24            | 2                   | 11                       | 7           | 16                    | 1          | 6          | 5          | 0     | 13            | 7                        |  |

Locations for International participants

| Country          | N |
|------------------|---|
| Australia        | 4 |
| Canada           | 2 |
| China            | 1 |
| France           | 1 |
| Germany          | 1 |
| Iran             | 1 |
| Italy            | 1 |
| Northern Ireland | 1 |
| South Africa     | 1 |
| Switzerland      | 4 |
| USA              | 7 |

File 4: Full list of Delphi outcomes, consensus levels, and round of inclusion/exclusion

|                                                                                                                      | R1 Percentage agreement | R1 Percentage Disagreement | Median | Researchers | Sus and carers | HCPs and DMs | Round 2 Status | Round 2 | Researcher | Sus and carers | HCP and DMs | Median |
|----------------------------------------------------------------------------------------------------------------------|-------------------------|----------------------------|--------|-------------|----------------|--------------|----------------|---------|------------|----------------|-------------|--------|
| Service user involvement in discharge planning (inc. feeling listened to)                                            | 87%                     | 4%                         | 7      | 65%         | 100%           | 95%          | Include        |         |            |                |             |        |
| Functioning (health, social, etc.)                                                                                   | 83%                     | 3%                         | 6      | 69%         | 100%           | 81%          | Include        |         |            |                |             |        |
| Mental health and illness (symptom/psychological distress)                                                           | 83%                     | 3%                         | 6      | 73%         | 91%            | 86%          | Include        |         |            |                |             |        |
| Personal Recovery                                                                                                    | 82%                     | 1%                         | 6      | 75%         | 86%            | 86%          | Include        |         |            |                |             |        |
| service user understanding of discharge plan                                                                         | 81%                     | 3%                         | 6      | 65%         | 91%            | 86%          | Include        |         |            |                |             |        |
| Quality of life                                                                                                      | 81%                     | 1%                         | 6.5    | 65%         | 90%            | 86%          | Include        |         |            |                |             |        |
| suicide Completed                                                                                                    | 80%                     | 4%                         | 7      | 80%         | 90%            | 68%          | Include        |         |            |                |             |        |
| Readmission                                                                                                          | 80%                     | 6%                         | 6      | 77%         | 77%            | 86%          | Include        |         |            |                |             |        |
| service user involvement in decision making (shared decision making)                                                 | 77%                     | 4%                         | 7      | 50%         | 95%            | 86%          | Include        |         |            |                |             |        |
| service user satisfaction with information provision at discharge (e.g. regarding medication, risk, crisis planning) | 77%                     | 6%                         | 6      | 65%         | 86%            | 81%          | Include        |         |            |                |             |        |
| service user knowledge of how to access community support (i.e. in an emergency)                                     | 77%                     | 3%                         | 6      | 58%         | 91%            | 86%          | Include        |         |            |                |             |        |
| Recurrence (i.e. relapse)                                                                                            | 75%                     | 1%                         | 6      | 58%         | 91%            | 76%          | Include        |         |            |                |             |        |
| Suicide Attempted                                                                                                    | 75%                     | 4%                         | 6      | 62%         | 86%            | 81%          | Include        |         |            |                |             |        |
| discharge to appropriate accommodation                                                                               | 75%                     | 3%                         | 6      | 69%         | 91%            | 67%          | Include        |         |            |                |             |        |
| service user satisfaction with treatment                                                                             | 74%                     | 7%                         | 6      | 58%         | 91%            | 71%          | Re-present     | 59%     | 43%        | 67%            | 70%         | 6      |
| service Availability (e.g. availability of community service, CPN, follow-up, social worker,                         | 74%                     | 7%                         | 6      | 46%         | 86%            | 95%          | Re-present     | 45%     | 27%        | 67%            | 50%         | 5      |

|                                                                                  |     |     |   |     |     |     |            |     |     |     |     |   |  |
|----------------------------------------------------------------------------------|-----|-----|---|-----|-----|-----|------------|-----|-----|-----|-----|---|--|
| bed in residential service)                                                      |     |     |   |     |     |     |            |     |     |     |     |   |  |
| Existence of a plan for community engagement/ care post discharge                | 74% | 4%  | 6 | 58% | 77% | 90% | Re-present | 72% | 57% | 83% | 90% | 6 |  |
| Feeling of support (from various group i.e. family, professional, friends)       | 72% | 4%  | 6 | 65% | 77% | 71% | Re-present | 43% | 33% | 50% | 50% | 5 |  |
| Suicide Risk                                                                     | 71% | 3%  | 6 | 58% | 77% | 81% | Re-present | 42% | 43% | 56% | 25% | 5 |  |
| Family/carer/other involvement in discharge planning (inc. feeling listened too) | 71% | 6%  | 6 | 65% | 77% | 75% | Re-present | 58% | 50% | 67% | 65% | 6 |  |
| service user readiness for discharge (incl. preparation)                         | 71% | 6%  | 6 | 58% | 77% | 81% | Re-present | 35% | 27% | 50% | 30% | 5 |  |
| Feeling of safety                                                                | 70% | 7%  | 6 | 65% | 73% | 71% | Re-present | 36% | 37% | 56% | 25% | 5 |  |
| service user satisfaction with discharge                                         | 69% | 4%  | 6 | 50% | 76% | 86% | Re-present | 45% | 40% | 50% | 50% | 5 |  |
| Physical Health and Wellbeing                                                    | 68% | 3%  | 6 | 50% | 77% | 81% | Re-present | 49% | 43% | 61% | 45% | 5 |  |
| service user experience of discharge                                             | 68% | 10% | 6 | 46% | 86% | 76% | Re-present | 29% | 23% | 44% | 30% | 5 |  |
| Housing stability                                                                | 68% | 3%  | 6 | 62% | 77% | 67% | Re-present | 41% | 37% | 39% | 40% | 5 |  |
| Coping skills                                                                    | 68% | 6%  | 6 | 50% | 77% | 80% | Re-present | 39% | 40% | 50% | 35% | 5 |  |
| Continuity of contact                                                            | 68% | 6%  | 6 | 64% | 77% | 62% | Re-present | 65% | 63% | 72% | 60% | 6 |  |
| Mortality                                                                        | 67% | 7%  | 6 | 68% | 76% | 57% | Re-present | 42% | 43% | 50% | 30% | 5 |  |
| self management                                                                  | 67% | 4%  | 6 | 46% | 86% | 71% | Re-present | 29% | 23% | 39% | 20% | 5 |  |
| Length of time before follow up/aftercare                                        | 65% | 6%  | 6 | 46% | 77% | 76% | Re-present | 58% | 43% | 83% | 65% | 6 |  |
| Isolation                                                                        | 65% | 9%  | 6 | 46% | 73% | 81% | Re-present | 55% | 50% | 72% | 45% | 6 |  |
| Availability of appropriate community support (i.e. allocated key worker)        | 64% | 9%  | 6 | 38% | 82% | 76% | Re-present | 52% | 27% | 72% | 70% | 6 |  |
| service user knowledge of own condition                                          | 64% | 6%  | 6 | 42% | 91% | 62% | Re-present | 36% | 30% | 50% | 35% | 4 |  |
| service user expectation of care                                                 | 63% | 3%  | 6 | 35% | 76% | 81% | Re-present | 28% | 20% | 28% | 40% | 4 |  |
| Hopelessness                                                                     | 63% | 9%  | 6 | 54% | 67% | 71% | Re-present | 46% | 47% | 44% | 45% | 5 |  |
| suicidal Ideation                                                                | 62% | 7%  | 6 | 46% | 77% | 67% | Re-present | 51% | 50% | 61% | 45% | 6 |  |



1  
2  
3  
4  
5  
6  
7  
8  
9  
10  
11  
12  
13  
14  
15  
16  
17  
18  
19  
20  
21  
22  
23  
24  
25  
26  
27  
28  
29  
30  
31  
32  
33  
34  
35  
36  
37  
38  
39  
40  
41  
42  
43  
44  
45  
46  
47

|                                                                             |     |     |   |     |     |     |            |     |     |     |     |   |
|-----------------------------------------------------------------------------|-----|-----|---|-----|-----|-----|------------|-----|-----|-----|-----|---|
| Medication Adherence                                                        | 62% | 4%  | 6 | 50% | 82% | 52% | Re-present | 45% | 47% | 44% | 40% | 5 |
| Loneliness                                                                  | 62% | 10% | 6 | 42% | 68% | 81% | Re-present | 41% | 37% | 56% | 30% | 5 |
| Information about the discharge reported to other relevant service          | 62% | 9%  | 6 | 50% | 73% | 71% | Re-present | 48% | 37% | 78% | 40% | 5 |
| service user experience of coercion at discharge                            | 61% | 6%  | 6 | 46% | 77% | 63% | Re-present | 43% | 40% | 67% | 35% | 5 |
| Clinical readiness for discharge                                            | 60% | 6%  | 6 | 48% | 67% | 67% | Re-present | 36% | 30% | 39% | 40% | 5 |
| Medication side Effects                                                     | 59% | 7%  | 6 | 38% | 77% | 67% | Re-present | 41% | 30% | 61% | 35% | 5 |
| Emergency department visit post discharge                                   | 59% | 6%  | 6 | 58% | 68% | 52% | Re-present | 62% | 63% | 67% | 60% | 6 |
| Quality of interpersonal relationship (friend and family)                   | 59% | 7%  | 6 | 50% | 77% | 52% | Re-present | 46% | 40% | 72% | 35% | 5 |
| Iatrogenic harm (patient safety incident or harm caused by the care system) | 59% | 4%  | 6 | 40% | 64% | 71% | Re-present | 51% | 37% | 72% | 50% | 6 |
| Completion of planned care                                                  | 59% | 7%  | 6 | 50% | 76% | 52% | Re-present | 39% | 40% | 56% | 30% | 5 |
| Concern/anxiety about discharge                                             | 58% | 9%  | 6 | 31% | 73% | 76% | Re-present | 26% | 17% | 33% | 35% | 4 |
| Autonomy (e.g. independence, autonomous decision making)                    | 57% | 3%  | 6 | 35% | 73% | 70% | Re-present | 36% | 27% | 50% | 30% | 5 |
| staff understanding of safe and effective discharge                         | 57% | 10% | 6 | 40% | 68% | 67% | Re-present | 41% | 30% | 67% | 35% | 4 |
| self injury (i.e. harm to self)                                             | 57% | 6%  | 6 | 50% | 64% | 52% | Re-present | 49% | 53% | 61% | 35% | 5 |
| Financial support (e.g. benefit advice, debt advice)                        | 57% | 9%  | 6 | 38% | 82% | 57% | Re-present | 46% | 40% | 72% | 30% | 5 |
| stable relationship with health professional                                | 55% | 4%  | 6 | 38% | 71% | 58% | Re-present | 33% | 37% | 50% | 20% | 5 |
| Medication Management                                                       | 54% | 3%  | 6 | 42% | 71% | 52% | Re-present | 42% | 37% | 61% | 40% | 5 |
| Carer/family/other satisfaction with discharge                              | 54% | 9%  | 6 | 35% | 68% | 57% | Re-present | 36% | 27% | 61% | 35% | 4 |
| Clinical Recovery                                                           | 53% | 7%  | 6 | 60% | 55% | 43% | Re-present | 36% | 33% | 50% | 30% | 5 |
| service use                                                                 | 52% | 4%  | 6 | 46% | 50% | 63% | Re-present | 30% | 33% | 39% | 15% | 4 |
| Violence                                                                    | 52% | 9%  | 6 | 46% | 60% | 48% | Re-present | 29% | 33% | 33% | 15% | 4 |
| Victim of crime                                                             | 52% | 12% | 6 | 38% | 68% | 48% | Re-present | 28% | 30% | 44% | 10% | 4 |
| Experience of stigma                                                        | 52% | 7%  | 6 | 42% | 59% | 57% | Re-present | 30% | 20% | 50% | 25% | 4 |

|                                                                                |                                 |     |     |     |     |     |                |         |     |     |        |     |   |
|--------------------------------------------------------------------------------|---------------------------------|-----|-----|-----|-----|-----|----------------|---------|-----|-----|--------|-----|---|
| Engagement with psychological intervention                                     | 51%                             | 4%  | 6   | 35% | 45% | 76% | Re-present     | 33%     | 30% | 67% | 5%     | 4   |   |
| Cancellation or change to follow up meeting                                    | 51%                             | 12% | 6   | 19% | 82% | 57% | Re-present     | 42%     | 23% | 67% | 40%    | 5   |   |
| serious incident (i.e. serious incident reported formally)                     | 50%                             | 6%  | 5.5 | 44% | 45% | 62% | Exclude        |         |     |     |        |     |   |
| Employment                                                                     | 50%                             | 7%  | 5.5 | 58% | 48% | 38% | Exclude        |         |     |     |        |     |   |
| Medication Knowledge                                                           | 49%                             | 9%  | 5   | 35% | 64% | 52% | Exclude        |         |     |     |        |     |   |
| Engagement with community service                                              | 49%                             | 4%  | 5   | 35% | 50% | 71% | Exclude        |         |     |     |        |     |   |
| Length of stay pre-discharge                                                   | 46%                             | 10% | 5   | 38% | 55% | 48% | Exclude        |         |     |     |        |     |   |
| Family/carer/other readiness for discharge                                     | 46%                             | 9%  | 5   | 42% | 55% | 43% | Exclude        |         |     |     |        |     |   |
| Leaving the hospital against medical advice                                    | 45%                             | 14% | 5   | 46% | 55% | 33% | Exclude        |         |     |     |        |     |   |
| Outpatient appointment/visit adherence                                         | 44%                             | 4%  | 5   | 54% | 57% | 24% | Exclude        |         |     |     |        |     |   |
| Aggression                                                                     | 44%                             | 10% | 5   | 42% | 43% | 48% | Exclude        |         |     |     |        |     |   |
| Delay in expected discharge                                                    | 43%                             | 13% | 5   | 12% | 67% | 57% | Exclude        |         |     |     |        |     |   |
| substance Misuse (incl. alcohol)                                               | 41%                             | 9%  | 5   | 28% | 50% | 48% | Exclude        |         |     |     |        |     |   |
| serious accidental injury                                                      | 40%                             | 12% | 5   | 25% | 36% | 62% | Exclude        |         |     |     |        |     |   |
| Community participation                                                        | 39%                             | 6%  | 5   | 35% | 36% | 48% | Exclude        |         |     |     |        |     |   |
| stability                                                                      | 38%                             | 4%  | 5   | 13% | 59% | 47% | Exclude        |         |     |     |        |     |   |
| Advocate involvement in discharge planning                                     | 37%                             | 12% | 5   | 24% | 45% | 45% | Exclude        |         |     |     |        |     |   |
| Professional/care team satisfaction with information provision at discharge    | 36%                             | 13% | 5   | 19% | 45% | 48% | Exclude        |         |     |     |        |     |   |
| Primary Care/Community service/Nongovernmental or Charity service satisfaction | 35%                             | 16% | 5   | 15% | 50% | 48% | Exclude        |         |     |     |        |     |   |
| Police intervention post discharge                                             | 34%                             | 16% | 5   | 35% | 32% | 35% | Exclude        |         |     |     |        |     |   |
| staff satisfaction with discharge                                              | 28%                             | 16% | 5   | 19% | 36% | 29% | Exclude        |         |     |     |        |     |   |
| Boredom                                                                        | 26%                             | 25% | 4   | 12% | 36% | 33% | Exclude        |         |     |     |        |     |   |
| Meaningful Activity (i.e. employment, studying, volunteering)                  | New outcome proposed in round 1 |     |     |     |     |     |                | Include | 77% | 73% | 83.33% | 80% | 6 |
| Resilience                                                                     | New outcome proposed in round 1 |     |     |     |     |     | Do not present |         |     |     |        |     |   |
| Dual harm (i.e. a person harms themselves and others)                          | New outcome proposed in round 1 |     |     |     |     |     |                | Exclude | 32% | 23% | 55.56% | 30% | 4 |

1  
2  
3  
4  
5  
6  
7  
8  
9  
10  
11  
12  
13  
14  
15  
16  
17  
18  
19  
20  
21  
22  
23  
24  
25  
26  
27  
28  
29  
30  
31  
32  
33  
34  
35  
36  
37  
38  
39  
40  
41  
42  
43  
44  
45  
46  
47

|                                                              |                                 |                |  |  |  |  |  |  |  |
|--------------------------------------------------------------|---------------------------------|----------------|--|--|--|--|--|--|--|
| Annual admissions                                            | New outcome proposed in round 1 | Do not present |  |  |  |  |  |  |  |
| Harm to others (violence, criminal or risk-taking behaviour) | New outcome proposed in round 1 | Do not present |  |  |  |  |  |  |  |
| Levels of patient confidentiality                            | New outcome proposed in round 1 | Do not present |  |  |  |  |  |  |  |
| Personal learning                                            | New outcome proposed in round 1 | Do not present |  |  |  |  |  |  |  |

For peer review only

**File 5: Proposed potential service user discharge experience PROM that includes items of most importance to stakeholders in addition to the core outcome set**

| Item                                                                 | Strongly Agree | Agree | Neither Agree nor Disagree | Disagree | Strongly Disagree |
|----------------------------------------------------------------------|----------------|-------|----------------------------|----------|-------------------|
| 1. I felt involved in my discharge planning                          |                |       |                            |          |                   |
| 2. I understood my discharge plan                                    |                |       |                            |          |                   |
| 3. I know how to access support in the community                     |                |       |                            |          |                   |
| 4. I was frequently involved in decisions about my care at discharge |                |       |                            |          |                   |
| 5. I was discharged to appropriate accommodation                     |                |       |                            |          |                   |
| 6. I was satisfied with the information provided to me at discharge  |                |       |                            |          |                   |

**File 6: Outcome Measure Recommendation Results**

## Methods

After the core outcome set was agreed in the consensus meeting, we invited all participants from the earlier stages of the project to recommend measures and time markers in a final online questionnaire. Participants were invited to participate if they had been involved in any of the previous online rounds. The invitation made it clear that the questionnaire is most relevant to researchers, but that other groups with an opinion or interest are welcome to contribute. This was due to the specific knowledge of instruments required to complete this round.

In this questionnaire participants were presented with the four core outcomes. For each core outcome they were presented with any measures used to assess that outcome in our systematic review studies [1] and any additional measures that had been recommended to the team during the process. Participants were asked to choose the one most appropriate, (don't know, other, new instrument, no instrument were also options). A second question also asked which time markers would be recommended, with options to select all applicable. These options were also developed based on time markers used in the systematic review [1].

## Results

Forty-three of the 93 invited participants responded (15 service users, 8 family members/carers, 23 researchers, 10 healthcare professionals, 3 end users of research), although as in previous rounds these were not distinct categories. Fifty-three percent of the respondents were researchers, this was expected as in the email we suggested that this stage may be more meaningful or of interest to this group, but as a team we chose not to exclude other groups with opinions on measurement instruments. Twenty-three percent of participants were international

researchers (from USA, Switzerland, Canada, and Australia). Table 4 shows the preliminary minimum measure recommendations and time markers, additional file 5 shows the results upon which the recommendations were based.

Table 1: Summary of Measurement Recommendations

| Core Outcome           | Instrument/Measure                          | Time Marker                 |
|------------------------|---------------------------------------------|-----------------------------|
| Readmission            | Retrospective review of administrative data | Within 28 days of discharge |
| Suicide Completed      | Retrospective review of administrative data | Within 28 days of discharge |
| Psychological Distress | Kessler Psychological Distress (K10)        | One month post-discharge    |
| Quality of Life        | ReQoL-10                                    | One month post-discharge    |

### 1. Readmission

A minimum recommendation of using retrospective review of administrative data for readmissions within a defined time period, the most agreed was 28 days. Participants indicated that routine data collection might cover slightly different time periods. Twenty-six of the 43 participants recommended a measure of around a month (1 month, 30 days or 28 days) with 28 days being this most popular. However, they also advise that this should be supplemented either by cross-checking with service-users, case managers or carers, where possible to improve quality of data. Those looking for more comprehensive data may also like to record 7 days, 3 months and 6 months as these were also popular recommendations.

### 2. Quality of Life

The participants recommended that researchers use the Recovering Quality of Life (ReQoL-10) at one month post-discharge [35]. This was the most recommended instrument by the group. However, many participants also voted for ReQoL 20, a large proportion of the group suggested this outcome. As this is a quality of life measure specific to mental health recovery they felt this is most appropriate. The one month time marker is in-keeping with the other COS time frames, making a more comprehensive and accessible core outcome set. Those using within-participant measures of quality of life may like to also measure a pre-discharge baseline. Researchers looking for more thorough assessment of quality of life may like to also measure at 7 days post-discharge and 3 months, as these were also highly recommended time markers or use the ReQoL 20 and report both scores for comparability.

### 3. Suicide Completed

The participants recommended retrospective review of administrative data, for suicide completed within 28 days of discharge. Retrospective review is in line with other outcomes and was marginally the highest suggestion. We chose within 28 days for consistency with readmission data. Researchers looking for more comprehensive data may want to use 7 days and 3 months as these were highly recommended also. They may also want to cross-check this information against other sources (carers/case managers) to ensure it is correct and

reported, particularly as participants mentioned the impact of incorrect coroner's reports on such data.

#### 4. Psychological Distress

The participants recommended Kessler Psychological Distress (K10) one month post-discharge [36]. For consistency with other outcomes we recommend measure at one month. Seven days and 3 months are also highly recommended, so we would recommend these for research that is more robust. Although there were very few votes for instruments for psychological distress and qualitative comments revealed that participants felt this is not measurable. The same amount of people who voted for K10 also voted for interviews or other measures and a similar amount recommended the development of a new measure, CORE-10 was similarly close [37]. Whilst we make this recommendation, we also suggest that future researchers may look to develop something specific for Psychological Distress in this core outcome set. Interviews would not effectively facilitate the between study comparison, the key purpose of a COS.

#### Outcome 1: Readmission

| Measure                                                                    | Number of votes | Important comments                                                                                                                                                                         |
|----------------------------------------------------------------------------|-----------------|--------------------------------------------------------------------------------------------------------------------------------------------------------------------------------------------|
| Interviews with SUs                                                        | 12              | <ul style="list-style-type: none"> <li>In some countries... there is no easily accessible data on readmission rates... in our experience self-reported in the most reliable way</li> </ul> |
| Retrospective review of administrative data                                | 13              | <ul style="list-style-type: none"> <li>Might not show people who need admission but don't because there's no bed</li> </ul>                                                                |
| Extracted from case-managers notes and cross-checked with hospital records | 10              | <ul style="list-style-type: none"> <li>Might be easier to gather administrative data, but worth cross-checking to improve quality of information</li> </ul>                                |
| Self-reported questionnaire                                                | 1               |                                                                                                                                                                                            |
| Other- carer interview                                                     | 2               |                                                                                                                                                                                            |
| Total                                                                      | 38              |                                                                                                                                                                                            |

**Conclusion:** A minimum recommendation of using retrospective review of administrative data. This will allow for various studies with diverse time and financial limits to use the COS. However, we also advise that this should be supplemented either by cross-checking with service-users, case managers or carers, where possible to improve quality of data.

#### Time Markers

| Time marker          | Number of Votes |
|----------------------|-----------------|
| Within 2 days        | 3               |
| Within 3 days        | 2               |
| Within 7 days        | 17              |
| Within 28 days       | 12              |
| Within 30 days       | 7               |
| Within 1 month       | 7               |
| Within 6 weeks       | 4               |
| Within 12 weeks      | 7               |
| Within 3 months      | 11              |
| Within 6 months      | 14              |
| Other (1yr and 3yrs) | 1               |

|                 |    |
|-----------------|----|
| Around 3 days   | 5  |
| Around a month  | 26 |
| Around 3 months | 18 |

**Conclusion:** The minimum recommendation to record readmission within 28 days. 26 of the 43 participants recommended a measure of around a month (1 month, 30 days or 28 days) with 28 being this most popular. Those looking for higher quality or more comprehensive data may also like to record 7 days, 3 months and 6 months as these were also popular recommendations.

## Outcome 2: Quality of Life

| Instrument                                          | Number of votes | Comments                                                                                                                                                                                                                                   |
|-----------------------------------------------------|-----------------|--------------------------------------------------------------------------------------------------------------------------------------------------------------------------------------------------------------------------------------------|
| ReQoL- 10                                           | 9               | 'I think ReQoL would be best for patients in MH services as I understand it was validated for CMHT patients but if someone didn't have contact with MH services before and isn't under a CMHT afterwards another measure might be better.' |
| ReQoL- 20                                           | 3               |                                                                                                                                                                                                                                            |
| Quality of Life Brief Version (Lehman)              | 2               |                                                                                                                                                                                                                                            |
| WHO Quality of Life Scale                           | 5               |                                                                                                                                                                                                                                            |
| Manchester Short Assessment Quality of Life (MANSA) | 1               |                                                                                                                                                                                                                                            |
| Satisfaction with Life Scale (SWLS)                 | 1               |                                                                                                                                                                                                                                            |
| SF12                                                | 2               |                                                                                                                                                                                                                                            |
| EQ5D                                                | 0               |                                                                                                                                                                                                                                            |
| AQoL-8D                                             | 0               |                                                                                                                                                                                                                                            |
| Other (ICECAP)                                      | 1               |                                                                                                                                                                                                                                            |
| Develop a new tool                                  | 2               |                                                                                                                                                                                                                                            |
| No instrument (interviews etc. instead)             | 7               | I think the use of tools should be complemented with interviews with service users and carers.                                                                                                                                             |
| Total                                               | 33              |                                                                                                                                                                                                                                            |
| ReQoL combined (10+20)                              | 12              |                                                                                                                                                                                                                                            |

**Conclusion:** We recommend that researchers use ReQoL-10. This was the most voted for instrument. If we also combine the scores with those who voted for ReQoL 20, a large proportion of the group suggested this outcome. As this is a quality of life measure specific to mental health recovery we feel this is most appropriate.

## Time markers

| Time Point                                     | Number of votes |
|------------------------------------------------|-----------------|
| Within 2 days                                  | 3               |
| Within 3 days                                  | 2               |
| Within 7 days                                  | 16              |
| Within 28 days                                 | 11              |
| Within 30 days                                 | 6               |
| Within 1 month                                 | 9               |
| Within 6 weeks                                 | 3               |
| Within 12 weeks                                | 5               |
| Within 3 months                                | 21              |
| Within 6 months                                | 11              |
| Other (within 9 months, 12 months and 3 years) | 2               |
| Pre-discharge                                  | 9               |
| Around 3 days                                  | 5               |
| Around 1 month                                 | 26              |
| Around 3 months                                | 26              |

**Conclusion:** We recommend a minimum measure of QoL at one month post-discharge in RCTs. This is in keeping with the readmission time frames, making a more comprehensive and accessible core outcome set. Those using within-participant measures of quality of life may like to



also measure a pre-discharge baseline. Those looking for more thorough assessment of QoL may like to also measure at 7 days post-discharge and 3 months, as these were also highly recommended time markers.

### Core Outcome 3: Suicide completed

| Measure                                                              | Number of votes |
|----------------------------------------------------------------------|-----------------|
| Retrospective review of administrative data                          | 18              |
| Extracted from case managers and cross-checked with hospital records | 17              |
| Extracted from clinical case notes                                   | 14              |
| Other                                                                |                 |
| Extracted from serious incident reporting                            |                 |
| From family and friends                                              | 4               |
| Total                                                                | 53              |

**Conclusion:** Retrospective review of administrative data. To keep in line with other outcomes and was marginally highest measure.

| Time Marker     | Number of votes |
|-----------------|-----------------|
| Within 2 days   | 2               |
| Within 3 days   | 2               |
| Within 7 days   | 20              |
| Within 28 days  | 12              |
| Within 30 days  | 4               |
| Within 1 month  | 9               |
| Within 6 weeks  | 0               |
| Within 12 weeks | 4               |
| Within 3 months | 14              |
| Within 6 months | 13              |
| Other           | 2               |
|                 |                 |
| Around 3 days   | 4               |
| Around 1 month  | 25              |
| Around 3 months | 18              |

**Conclusion.** Within 28 days for consistency with other outcomes. Other researchers may want to use 7 days and 3 months as these were highly recommended also.

### Outcome 4: Psychological Distress

| Instrument                                                    | Number of votes |
|---------------------------------------------------------------|-----------------|
| Kessler Psychological Distress (K10)                          | 6               |
| CORE-10                                                       | 5               |
| Brief Psychiatric Rating Scale (BPRS)                         | 3               |
| Brief Symptom Inventory (BSI)                                 | 1               |
| The positive and negative symptom scale                       | 1               |
| The Discharge List (DL) – 20 item scale                       | 2               |
| Clinical Global Impression to Assess illness severity         | 0               |
| ASI (Psychiatric problem subscale)                            | 0               |
| PSYRAT (Psychological Distress subscale)                      | 1               |
| Develop a new self-assessment tool for psychological distress | 5               |
| Other                                                         | 1               |
| No instrument (interview or other method instead)             | 6               |
| Total                                                         | 31              |

**Conclusion:** We recommend Kessler Psychological Distress (K10). Although there were very few votes for measures. The same amount of people who voted for K10 also voted for interviews or other measures and a similar amount recommended the development of a new measure,

CORE-10 was similarly close. Whilst we make this recommendation, we also suggest that future researchers may look to develop something specific for this core outcome set. Interviews would not allow for easy comparison of scores so would not be relevant for a core outcome set.

#### Time Markers

| Time Marker                           | Number of votes |
|---------------------------------------|-----------------|
| Within 2 days                         | 2               |
| Within 3 days                         | 4               |
| Within 7 days                         | 22              |
| Within 28 days                        | 8               |
| Within 30 days                        | 4               |
| Within 1 month                        | 14              |
| Within 6 weeks                        | 3               |
| Within 12 weeks                       | 4               |
| Within 3 months                       | 15              |
| Within 6 months                       | 14              |
| Other                                 | 3               |
| Pre-discharge baseline measure at ... | 5               |
|                                       |                 |
| Around 3 days                         | 6               |
| Around 1 month                        | 26              |
| Around 3 months                       | 19              |

**Conclusion:** The minimum recommendation is one month post-discharge. For consistency with other outcomes we recommend measure at one month. 7 days and 3 months are also highly recommended, so we would recommend these for more thorough research.

1  
2  
3  
4  
5  
6  
7  
8  
9  
10  
11  
12  
13  
14  
15  
16  
17  
18  
19  
20  
21  
22  
23  
24  
25  
26  
27  
28  
29  
30  
31  
32  
33  
34  
35  
36  
37  
38  
39  
40  
41  
42  
43  
44  
45  
46  
47  
48  
49  
50  
51  
52  
53  
54  
55  
56  
57  
58  
59  
60

For peer review only

1  
2  
3  
4  
5  
6  
7  
8  
9  
10  
11  
12  
13  
14  
15  
16  
17  
18  
19  
20  
21  
22  
23  
24  
25  
26  
27  
28  
29  
30  
31  
32  
33  
34  
35  
36  
37  
38  
39  
40  
41  
42  
43  
44  
45  
46  
47  
48  
49  
50  
51  
52  
53  
54  
55  
56  
57  
58  
59  
60

For peer review only

1

2

3

4

5

6

7

8

9

10

11

12

13

14

15

16

17

18

19

20

21

22

23

24

25

26

27

28

29

30

31

32

33

34

35

36

37

38

39

40

41

42

43

44

45

46

47

48

49

50

51

52

53

54

55

56

57

58

59

60

| SECTION/TOPIC             | ITEM No. | CHECKLIST ITEM                                                                                                                                                                                                   | PAGE NO. |
|---------------------------|----------|------------------------------------------------------------------------------------------------------------------------------------------------------------------------------------------------------------------|----------|
| <b>TITLE/ABSTRACT</b>     |          |                                                                                                                                                                                                                  |          |
| Title                     | 1a       | Identify in the title that the paper reports the development of a COS                                                                                                                                            | 1        |
| Abstract                  | 1b       | Provide a structured summary                                                                                                                                                                                     | 2        |
| <b>INTRODUCTION</b>       |          |                                                                                                                                                                                                                  |          |
| Background and Objectives | 2a       | Describe the background and explain the rationale for developing the COS.                                                                                                                                        | 3-4      |
|                           | 2b       | Describe the specific objectives with reference to developing a COS.                                                                                                                                             | 4        |
| Scope                     | 3a       | Describe the health condition(s) and population(s) covered by the COS.                                                                                                                                           | 4        |
|                           | 3b       | Describe the intervention(s) covered by the COS.                                                                                                                                                                 | 4        |
|                           | 3c       | Describe the setting(s) in which the COS is to be applied.                                                                                                                                                       | 4        |
| <b>METHODS</b>            |          |                                                                                                                                                                                                                  |          |
| Protocol/Registry Entry   | 4        | Indicate where the COS development protocol can be accessed, if available, and/or the study registration details.                                                                                                | 4        |
| Participants              | 5        | Describe the rationale for stakeholder groups involved in the COS development process, eligibility criteria for participants from each group, and a description of how the individuals involved were identified. | 5        |
| Information Sources       | 6a       | Describe the information sources used to identify an initial list of outcomes.                                                                                                                                   | 5        |
|                           | 6b       | Describe how outcomes were dropped/combined, with reasons (if applicable).                                                                                                                                       | 6        |
| Consensus Process         | 7        | Describe how the consensus process was undertaken.                                                                                                                                                               | 6-8      |
| Outcome Scoring           | 8        | Describe how outcomes were scored and how scores were summarised.                                                                                                                                                | 6-8      |
| Consensus Definition      | 9a       | Describe the consensus definition.                                                                                                                                                                               | 7-8      |
|                           | 9b       | Describe the procedure for determining how outcomes were included or excluded from consideration during the consensus process.                                                                                   | 7-8      |
| Ethics and Consent        | 10       | Provide a statement regarding the ethics and consent issues for the study.                                                                                                                                       | 8        |
| <b>RESULTS</b>            |          |                                                                                                                                                                                                                  |          |
| Protocol Deviations       | 11       | Describe any changes from the protocol (if applicable), with reasons, and describe what impact these changes have on the results.                                                                                | N/A      |
| Participants              | 12       | Present data on the number and relevant characteristics of the people involved at all stages of COS development.                                                                                                 | 8-9      |
| Outcomes                  | 13a      | List all outcomes considered at the start of the consensus process.                                                                                                                                              | SF4      |
|                           | 13b      | Describe any new outcomes introduced and any outcomes dropped, with reasons, during the consensus process.                                                                                                       | SF2&4    |
| COS                       | 14       | List the outcomes in the final COS.                                                                                                                                                                              | 12       |
| <b>DISCUSSION</b>         |          |                                                                                                                                                                                                                  |          |
| Limitations               | 15       | Discuss any limitations in the COS development process.                                                                                                                                                          | 15       |
| Conclusions               | 16       | Provide an interpretation of the final COS in the context of other evidence, and implications for future research.                                                                                               | 15       |
| <b>OTHER INFORMATION</b>  |          |                                                                                                                                                                                                                  |          |
| Funding                   | 17       | Describe sources of funding/role of funders.                                                                                                                                                                     | 17       |
| Conflicts of Interest     | 18       | Describe any conflicts of interest within the study team and how these were managed.                                                                                                                             | 16       |

doi:10.1371/journal.pmed.1002148.t001
